# Supplementary material
Source: PubMed Central journal article supplement (PMC3266183)

## **Networks of intergenic long-range enhancers and SNP-RNAs driving castration-resistant phenotype of human prostate cancer**

Anna Glinskii , Shuang Ma , Jun Ma , Denise Grant-Lanza , Chang-Uk Lim , Ian Guest , Stewart Sell, Ralph Buttyan, Gennadi Glinsky

Translational and Functional Genomics Laboratory, Department of Pathology and Laboratory Medicine, and Department of Surgery, Division of Urology, Albany Medical College,

Orday Cancer Center, Orday Research Institute, Inc., Center for Medical Science  
150 New Scotland Ave, Albany, NY 12208

Genlighttechnologies Corporation, Inc., 939 Coast Blvd., Suite 4M, La Jolla, Ca 92037

Email: [genlightec@gmail.com](mailto:genlightec@gmail.com)

Running title: Intergenic trans-regulatory non-coding SNP-RNAs

Supplement Description

1. Supplemental Text
2. Supplemental Methods
3. Supplemental References
4. Supplemental Figure Legends
5. Supplemental Figures S1-S10
6. Supplemental Tables S1-S10

## Supplemental Text

Transcriptome analysis using high-density tiling arrays demonstrated that vast majority of transcripts in human cells is represented by non-coding RNAs, biogenesis and functional significance of which remain obscure (1-7). Whole-genome transcript mapping studies of *H. sapiens* discovered a genome-scale highly efficient, pervasive transcription of introns and intergenic sequences and documented presence of promoter-associated short RNAs (PASR) and termini-associated short RNAs (TASR; ref. 1-7). Deep sequencing analysis of small RNAs (<200 nucleotides) from human cells revealed that post-transcriptional processing generates a remarkably diverse family of small non-coding RNAs (8). Fine mapping of transcriptional products originated from active promoters of protein-coding genes by RNA polymerase II (RNAPII) identified a population of small non-coding RNAs of 20 to 90 nucleotides in length termed transcription start site-associated RNAs (TSSa-RNAs; ref. 9). This widespread divergent bidirectional transcription at promoters of protein-coding genes may help to maintain a “competence” state of promoter regions poised for subsequent regulation (9). Consistent with the regulatory role of non-coding RNAs, it has been shown that RNAPII transcription of ncRNAs is required for chromatin remodeling at the fission yeast *Schizosaccharomyces pombe* *fbp1(+)* locus during transcriptional activation, which indicates that active transcription through the promoter-associated non-coding regions is required to make promoter sequences accessible to RNAPII and transcriptional activators (10).

Recent significant progress in our knowledge of genetic traits which are associated with increased risk of developing multiple human disorders is driven by combined application of intellectual expertise as well as methodological and conceptual principles of genomics and molecular epidemiology to large-scale genome-wide association studies (GWAS) of SNP variations (reviewed in 11-16). A dominant mechanistic approach is based on considerations of the potential effects of SNP variations on protein-coding genes within or near boundaries of which the genetic variants are located. This protein-centric strategy was recently extended to consider the SNP variants residing within boundaries of genes encoding microRNAs and SNPs within microRNA-target sites in mRNAs (reviewed in 11-16). One of notable common outcomes of GWAS is that many disease-linked SNPs identified to date are located within introns or non-genic regions of human genomes which have no direct relations to known protein-coding sequences or microRNA genes. These data suggest that non-canonical mechanisms of phenotype-altering effects of genetic variations may be relevant. A disease phenocode hypothesis has been articulated that is stating that intergenic DNA sequence variations associated with multiple common human disorders may affect phenotypes *in trans* via non-protein-coding SNP sequence-bearing RNA intermediaries (11-14).

Using microarray expression profiling of all known PCGs and microRNA genes, RNA interference (RNAi) and gene transfer approaches, we are dissecting the molecular anatomy and biological consequences of the epigenetic regulatory cross-talk between transRNAs and microRNAs. We identified a set of 4 “stemness” microRNAs (mir-20b; miR-375; miR-205; miR-486) which are up-regulated in the following

experimental and clinical samples: normal human cells engineered to constitutively express *NALP1*-locus autoimmunity transRNAs, human embryonic stem cells, blood-borne human prostate carcinoma (PC) metastasis precursor cells, clinical PC samples, human PC cell lines selected for increased malignant potential in vivo. We documented altered expression patterns of cancer predisposition (CP) transRNAs in cell lines genetically engineered to stably express selected “stemness” microRNAs and **in human cells engineered to constitutively express *NALP1*-locus autoimmunity transRNAs (Supplemental Figure 3).**

## References

1. Bertone P, Stolc V, Royce TE, Rozowsky JS, Urban AE, Zhu X, Rinn JL, Tongprasit W, Samanta M, Weissman S, Gerstein M, Snyder M. Global identification of human transcribed sequences with genome tiling arrays. *Science* 2004; 306:2242-6.
2. ENCODE Project Consortium. Identification and analysis of functional elements in 1% of the human genome by the ENCODE pilot project. *Nature* 2007; 447:799-816.
3. Washietl S, Pedersen JS, Korbelt JO, Stocsits C, Gruber AR, Hackermüller J, Hertel J, Lindemeyer M, Reiche K, Tanzer A, Ucla C, Wyss C, Antonarakis SE, Denoeud F, Lagarde J, Drenkow J, Kapranov P, Gingeras TR, Guigó R, Snyder M, Gerstein MB, Reymond A, Hofacker IL, Stadler PF. Structured RNAs in the ENCODE selected regions of the human genome. *Genome Res* 2007; 17: 852-64.
4. Rozowsky JS, Newburger D, Sayward F, Wu J, Jordan G, Korbelt JO, Nagalakshmi U, Yang J, Zheng D, Guigó R, Gingeras TR, Weissman S, Miller P, Snyder M, Gerstein MB. The DART classification of unannotated transcription within the ENCODE regions: associating transcription with known and novel loci. *Genome Res* 2007; 17:732-45.
5. Kapranov P, Cheng J, Dike S, Nix DA, Dutttagupta R, Willingham AT, Stadler PF, Hertel J, Hackermüller J, Hofacker IL, Bell I, Cheung E, Drenkow J, Dumais E, Patel S, Helt G, Ganesh M, Ghosh S, Piccolboni A, Sementchenko V, Tammana H, Gingeras TR. RNA maps reveal new RNA classes and a possible function for pervasive transcription. *Science* 2007; 316: 1484-8.
6. Gerstein MB, Bruce C, Rozowsky JS, Zheng D, Du J, Korbelt JO, Emanuelsson O, Zhang ZD, Weissman S, Snyder M. What is a gene, post-ENCODE? History and updated definition. *Genome Res* 2007; 17:669-81.
7. Gingeras TR. Origin of phenotypes: genes and transcripts. *Genome Res* 2007; 17:682-90.
8. Fejes-Toth K, Sotirova V, Sachidanandam R, Assaf G, Hannon GJ, Kapranov P, Foissac S, Willingham AT, Dutttagupta R, Dumais E, Gingeras TR. Affymetrix ENCODE Transcriptome Project; Cold Spring Harbor Laboratory ENCODE Transcriptome Project. Post-transcriptional processing generates a diversity of 5'-modified long and short RNAs. *Nature* 2009; 457: 1028-32.
9. Seila AC, Calabrese JM, Levine SS, Yeo GW, Rahl PB, Flynn RA, Young RA, Sharp PA. Divergent transcription from active promoters. *Science* 2008; 322: 1849-51.
10. Hirota K, Miyoshi T, Kugou K, Hoffman CS, Shibata T, Ohta K. Stepwise chromatin remodelling by a cascade of transcription initiation of non-coding RNAs. *Nature* 2008; 456:130-4.
11. Glinksky G. Phenotype-defining functions of multiple non-coding RNA pathways. *Cell Cycle* 2008 7:1630-9.

12. Glinsky GV. An SNP-guided microRNA map of fifteen common human disorders identifies a consensus disease phenocode aiming at principal components of the nuclear import pathway. *Cell Cycle* 2008 7: 2570-83.
13. Glinsky GV. SNP-guided microRNA maps (MirMaps) of 16 common human disorders identify a clinically-accessible therapy reversing transcriptional aberrations of nuclear import and inflammasome pathways. *Cell Cycle* 2008 7: 3564-76.
14. Glinsky GV. Disease phenocode analysis identifies SNP-guided microRNA maps (MirMaps) associated with human "master" disease genes. *Cell Cycle* 2008 7: 3680-94.
15. Glinskii, AB, Ma, J, Ma, S, Grant, D, Lim, C, Sell, S, Glinsky, GV. Identification of intergenic trans-regulatory RNAs containing a disease-linked SNP sequence and targeting cell cycle progression/differentiation pathways in multiple common human disorders. *Cell Cycle* 2009: 3925-42.
16. Glinsky, GV. Genome template switch hypothesis of cancer predisposition. Regulation of MicroRNA Noncoding RNA Expression, *Functional Genomics*. In: Proceedings of the 100th Annual Meeting of the American Association for Cancer Research; 2009 Apr 18-22; Denver, CO. Philadelphia (PA): AACR; 2009. Abstract nr 2652.
17. Glinsky GV. Human genome connectivity code links disease-associated SNPs, microRNAs and pyknons. *Cell Cycle* 2009; 8:925-30.

## Supplemental Materials and Methods

### Disease associated SNP meta-analysis and mapping of genomic coordinates

Primary data sets of SNPs for meta-analysis of genomic coordinates of SNP variations identified in genome-wide association studies (GWAS) of up to 712,253 samples comprising 221,158 disease cases, 322,862 controls, and 168,233 case/control subjects of obesity GWAS were obtained from previously published studies (References in online Supplement). Mapping of the SNP genomic coordinates was performed based on the NCBI release of Human Genome Build 36.3 (reference assembly). Genomic coordinates of the human K4-K36 domains and human lincRNAs are available in the online Supplement data set (7). Genomic coordinates and gene names of the human bivalent domain genes were obtained from the recently published study (8).

### Cell Lines

Human BJ1, RWPE1, HME1, U937, and THP-1 cell lines were obtained from ATCC. hTERT-immortalized BJ1 cells were previously described (1).

**Tumor Cell Xenografts.** Sub-confluent monolayers of control LNCaP or LNCaP-P1 cells were trypsinized and counted, then resuspended in RPMI-1640 medium with 25% charcoal-dextran stripped-fetal bovine serum (CDS-FBS) and 50% (vol/vol) 2 X Matrigel (Millipore, Inc., Billerica, MA). Aliquots (250  $\mu$ l) containing  $10^6$  cells were then injected subcutaneously in the flanks of 8-week male NCR Nu/Nu mice (Taconic, Inc.) that had been surgically castrated 10 days prior through a scrotal incision under anesthesia or sham-castrated involving the scrotal incision without removal of the testis. Tumor size was estimated from largest diameter (a), smallest diameter (b) and height (c) measurements with calipers with tumor volume calculated using the formula  $V = \pi/6 \times a \times b \times c$  (Dethlefsen, LA, Prewitt, JMS, Mendelsohn, ML Analysis of tumor growth curves, J Natl Cancer Inst, 40: 389-405, 1968). Mice were euthanized at the end of the experiments and tumors were surgically recovered.

### Microarray gene expression analysis

Technical and analytical aspects as well as stringent QC and statistical protocols of gene expression analysis experiments was carried-out essentially as described in our published work (2-6). Briefly, the array hybridization and processing, data retrieval and analysis was carried out using standard sets of the Affymetrix equipment, software, and protocols in state-of-the-art Affymetrix microarray core facility. RNA was extracted from cell cultures of two independent biological replicates of each experimental condition and analyzed for sample purity and integrity using BioAnalyzer (Agilent). Expression analysis of 54,675 transcripts was carried out for each sample in duplicates using Affymetrix HG-U133A Plus 2.0 arrays. Data retrieval and analysis was performed using MAS5.0 software and concordant changes of gene expression for each experimental condition were determined at the statistical threshold p value < 0.05 (two-tailed T-test). All microarray analysis data are publicly available coincidentally with the date of publication.

### microRNA isolation and activity analysis.

microRNA was extracted from adherent cells lysed on culture plates using the *mirVana* miRNA Isolation kit (Ambion). Homogenized cell lysates were frozen at -80 °C for at least 24 hours prior to microRNA purification. miRNA concentration was checked using

a NanoDrop (Thermo Scientific) before checking quality on a Bioanalyzer (Agilent Technologies).

To assay the activity of microRNAs in transfected cells we used a miRNA Luciferase Reporter Vector (Signosis) specific for microRNA of interest. The target site sequence of the reporter vector is complementary to the miRNA, therefore a decrease in luciferase signal would indicate an increase in microRNA activity. Cells were transfected with the reporter vector using FuGENE 6 Transfection Reagent (Roche); the transfection was allowed to run 48 hours before the cells were lysed using Luciferase Cell Culture Lysis Reagent (Promega). The lysates were read using the FLUOstar OPTIMA system (BMG Lab Technologies), with 20 micro liters of Luciferase Assay Reagent (Promega) injected into each well immediately prior to reading.

### **miRNA expression analysis.**

To analyze a spectrum of miRNA activity in the infected cell lines, we performed qPCR using the TaqMan Human MicroRNA Array v1.0 (Applied Biosystems) run on the 7900HT Fast Real-Time PCR System, fitted with the specific block to run 384-well TaqMan Low Density Arrays (Applied Biosystems). This TaqMan array is distributed on a micro fluidics card, which allows for high reproducibility with minimal error. The array contains 365 different human miRNA assays and two small nucleolar RNAs that function as endogenous controls for data normalization. All miRNA samples were analyzed for quality control and processed at the Functional Genomics Core of the University of Rochester in Rochester, New York. We used the SDS 2.2 software, the platform for the computer interface with the 7900HT PCR System, to generate normalized data, compare samples, and calculate RQ.

### **Cell Staining and Flow Cytometry**

Cells were stained at a concentration of  $1 \times 10^6$  cells per 100  $\mu$ l of HBSS with 2% HICS. Antibodies at appropriate dilutions (CD14-Pacific Blue, Biolegend, Inc; and CD11b-Alexa Fluor® 647, Biolegend, Inc) were added. Staining duration was for 30min with rotation at 4°C. Cells were then washed with staining medium three times and re-suspended in staining medium. The stained specimens were then analyzed using FACSVantage (BD Biosciences, San Diego, CA; <http://www.bdbiosciences.com>) or FACSAria with either Diva or CellQuest software (BD Biosciences). The cell counter of the flow cytometers was used to determine cell numbers. Cells were collected into HBSS with 2% HICS.

### **Induced Differentiation of U937 and THP-1 cells**

Approximately  $2 \times 10^6$  U937 or THP-1 cells ( $5 \times 10^5$  cells/ml) in a 25 cm flask were induced to differentiate by treatment with 20  $\mu$ M PMA (Sigma-Aldrich) for 4 days.

### **Lentivirus Production and Generation of stably transfected BJ1, U937, RWPE1, LNCap, and THP-1 cells**

Allele-specific sense and anti-sense variants of the rs2670660 sequence of 52 nt in length (Figure 1A; nucleotide sequence shown in shaded box) were chemically synthesized and cloned sequentially into pUC57 plasmid by EcoRV (GeneScript Corporation) and pCDH-CMV-MCS-EF1-copGFP plasmid by EcoRI and NotI (SystemsBio). The integrity and molecular identity of the synthetic sequences as well as designed plasmid vectors were monitored by restriction enzyme mapping analysis and direct sequencing. Lentiviruses were generated by co-transfecting pLentiviral vector

with GFP only plasmids (control cultures) or GFP plasmids with synthetic allele-specific 52 nt sequences of the SNP rs2670660 as shown in Figure 1 (see Ref. 4 and Supplemental Material for additional information) and packaging mix (Invitrogen) into 293FT cells using Lipofectamine 2000 according to the manufacturer's instructions (Invitrogen), and then target cells were infected with viral supernatant for 24hr. Flow cytometry analysis for GFP expression were performed to confirm the infection and assess the transfection efficiency. Experiments were carried out using cultures with transfection efficiency > 90%.

### **Luciferase reporter assays**

Luciferase reporter assays were carried-out to identify allele-specific features of SNP-bearing RNA and DNA sequences. Enhancer/insulator activities of the 2 kb intergenic DNA sequence containing distinct allelic variants of the rs2670660 NLRP1-locus SNP. Luciferase reporter assays to assess the enhancer activity of 2 kb NLRP1-locus intergenic region was carried out in RWPE1 and HEK293 cells transiently expressing either control luciferase reporter plasmids or plasmids containing chemically synthesized 2 kb sequences flanking distinct allelic variants of the *NLRP1*-locus intergenic SNP rs2670660, which is positioned exactly in the middle of the enhancer's sequence. Because allelic differences in the luciferase reporter assays tend to be modest, measurements were controlled by multiple replications of all experimental elements of the enhancer assay. We considered the possibility of multiple levels of variations, including plasmid preps, transfection replicates (along with transfection efficiency measurements, such as using the Renilla luciferase co-transfection controls for normalization). At least three independent experiments were carried out for each setting and three replicates of the luciferase assay were performed in each experiment. Results were validated using at least two independent plasmid preps to control for this potentially significant source of variation.

### **Colony Growth Assay**

Cells from sub-confluent cultures (~ 70% confluence) were seeded in triplicates into 6-well plates (100 cells per well), cultured for 2 weeks, and then stained with 0.1% crystal violet for 5 min. Plates were scanned and number of colonies containing > 50 cells was counted.

### **Protocols for identification of endogenous trans-regulatory small RNAs encoded by the SNP rs2670660**

1. Extract small RNA from cells using mirVana isolation kit. (**protocol A**)
2. Detect if there is DNA contamination by performing PCR using extracted RNA as template and  $\beta$ -actin as primer. (**protocol B**)
3. Synthesize cDNA from small RNA extracted. (**protocol C**)
4. Perform first PCR using primer set 2 (GC2F and GC2R). (**protocol B**)
5. Clean up PCR product and evaluate cleanup PCR product on 1.2% gel. (**protocol D**)
6. Perform nested PCR using cleanup first PCR product as template and primer set 1 (GC1F and GC1R) and evaluate nested PCR product on 1.2% gel. (**protocol B**)
7. Cut the DNA band of interest from the gel, extract and purify the DNA for further sequencing analysis. (**protocol E**)

## APPENDIX

### ***Protocol A: Extract small RNA from cells using mirVana isolation kit, AB #1560, 1561***

#### **Cell lysis and homogenization**

1. Collect culture medium containing cells and spin cells down. Aspirate the culture medium and wash the cells with 4 ml PBS. Spin cells down again.
  2. Add 600  $\mu$ l Lysis/Binding solution and resuspend cell pellet by pipetting up and down.
  3. Add 1/10 volume (60  $\mu$ l) of miRNA Homogenate Additive to the cell lysate, mix well by vortexing and leave it on ice for 10 min. keep at -80°C overnight.
- ❖ Starting number of cells:  $5 \times 10^6$  cells.

#### **Organic extraction**

4. Add a volume of Acid-Phenol:Chloroform (equal to the cell lysate before adding Additive).
  - ❖ Be sure to withdraw from the bottom phase in the bottle of Acid-Phenol:Chloroform.
5. Vortex for 30-60 sec to mix and then centrifuge for 5 min at 10,000  $\times$ g at RT to separate the aqueous and organic phases.
6. Carefully remove the aqueous (upper) phase without disturbing the lower phase, and transfer it to a new tube. Note the volume removed.

#### **Final small RNAs isolation**

- ❖ Preheat Elute Solution to 95°C.
  - ❖ Put 100% ethanol at RT.
7. Add 1/3 volume of 100% ethanol to the aqueous phase collected. Mix thoroughly by vortexing.
  8. Pipet the lysate/ethanol mixture onto a filter cartridge placed on a collection tube. (up to 700  $\mu$ l can be applied at a time) Centrifuge at 10,000  $\times$ g (usually 10,000 rpm) for 15 sec to pass the mixture through the filter. Transfer the flow-through to a fresh tube and repeat pipetting and centrifuging for excessive mixture.
  9. Pool the collected filtrate. Note the total volume of flow-through.
  10. Add 2/3 volume RT 100% ethanol to filtrate and mix thoroughly.
  11. Pipet the filtrate /ethanol mixture onto a second filter (up to 700  $\mu$ l can be applied at a time) and centrifuge at 10,000  $\times$ g (usually 10,000 rpm) for 15 sec to pass the mixture through the filter. Discard the flow-through and repeat pipetting and centrifuging for excessive mixture.
  12. Apply 700  $\mu$ l miRNA Wash Solution 1 to the Filter Cartridge and centrifuge for 5-10 sec. Discard the flow-through and replace the Filter Cartridge into the same collection tube.
  13. Apply 500  $\mu$ l Wash Solution 2/3 and centrifuge for 5-10 sec and discard the flow-through. Repeat once with a second 500  $\mu$ l Wash Solution 2/3.
  14. After discarding the flow-through, spin the Filter Cartridge on collection tube for 1 min to remove residual fluid from the filter.



15. Transfer the Filter Cartridge into a fresh Collection tube. Apply 100  $\mu$ l of pre-heated 95°C Elution Solution to the center of the filter, close the cap and spin at maximum speed for 20-30 sec to elute the RNA. Keep the RNA at -80°C.

**Protocol B: PCR**

1. In a clean tube on ice, combine PCR reagents to a 25  $\mu$ l final volume.

|                             | For each 25 $\mu$ l reaction        |
|-----------------------------|-------------------------------------|
| Water, RNase-free           | ___ $\mu$ l                         |
| PCR Buffer (10X)            | 2.5 $\mu$ l                         |
| PCR Nucleotide Mix (10mM)   | 0.5 $\mu$ l                         |
| Taq DNA polymerase (50X)    | 0.5 $\mu$ l                         |
| template                    | ___ $\mu$ l                         |
| Forward primer (10 $\mu$ M) | 1 $\mu$ l (0.4 $\mu$ M final conc.) |
| Reverse primer (10 $\mu$ M) | 1 $\mu$ l (0.4 $\mu$ M final conc.) |
| Total                       | 25 $\mu$ l                          |

Mix contents of tube by vortexing, collect contents at bottom of tube and store on ice.

2. Thermal cycle

|                      |      |                          |
|----------------------|------|--------------------------|
| Initial denaturation | 95°C | 3 min                    |
| For cycle 40 or more |      |                          |
| Denaturation         | 95°C | 30 sec                   |
| Annealing            | 55°C | 30 sec                   |
| Extension            | 72°C | 1 min (or 1 or 2 min/kb) |
| Final extension      | 72°C | 3 min                    |
| Hold                 | 4°C  |                          |

3. Evaluating PCR product on 1.2 % agarose gel.

**Protocol C: RT to synthesize cDNA (for 25  $\mu$ l cDNA product)**

1. In the first tube, mix RNA and reverse primer well by vortexing at half speed for several sec, spin the tubes in a microcentrifuge at 4°C and keep on ice. (total 10µl)

|         | RNA (µl)       | Random Primer (50 µM, µl) | Water (µl)              |
|---------|----------------|---------------------------|-------------------------|
| For RNA | ___ µl (=1 µg) | 1                         | ___µl (= 9– RNA volume) |

2. Heat RNA/primer mixture at 75°C for 5 min and cool on ice for 5 min.
3. Make master mix from the following items:

|                              | each sample (µl) | Total (µl) x |
|------------------------------|------------------|--------------|
| water                        | 6.75             |              |
| RT buffer (5X)               | 5                |              |
| PCR nucleotide mix (10mM)    | 1.25             |              |
| RNase inhibitor (4 units/µl) | 1                |              |
| M-MLV RT (25X)               | 1                |              |
| Total                        | 15               |              |

Mix contents of tube by vortexing, keep on ice 5 min, vortex again, spin the tubes and keep on ice.

4. Add 15 µl mixtures from step 3 into the first tube on ice.
5. Design a thermal cycler program
  - Step 42°C, 30 min
  - 1
  - Step 95°C, 5 min
  - 2
  - Step 4°C for storage until removal from the thermal cycler
  - 3
6. Dilute 25 µl RT products (cDNA) 10 times and use 10 µl diluted cDNA as template in PCR. Aliquot the leftover and keep in -20°C freezer.

**Protocol D: PCR product purification by Montage PCR Centrifugal Filter Devices (Millipore, p36461)**

1. Insert the Montage PCR sample reservoir into one of the two vials provided.
2. Pipette 300 µl distilled water or TE buffer into sample reservoir without touching the membrane. Add 100 µl PCR reaction to the reservoir. Seal with attached cap.
3. Place assembly in a compatible centrifuge and counter-balance with a similar device.
4. Spin the Montage PCR unit at 1000 xg for 15 min. (no longer than 15 min and no greater than 1000 xg)

5. Remove assembly from centrifuge. Separate vial from sample reservoir. Save filtrate.
6. Place sample reservoir upright into a clean vial and add 20  $\mu$ l distilled water or TE buffer carefully to the purple end of the reservoir. Avoid touching the membrane surface.
7. Invert the reservoir into a clean vial and spin at 1000  $\times$ g for 2 min.

***Protocol E: Extraction and purification of DNA from gel using QIAquick Gel Extraction Kit***

- All centrifugation are carried out at 17,900 $\times$  (13,000rpm) at RT.
- Add 100% ethanol to Buffer PE before use.
- The yellow color of Buffer QG indicates a pH $\leq$ 7.5.

**Procedure**

1. Excise the DNA fragment from the agarose gel with a clean, sharp scapel.
2. Weigh the gel slice in a colorless tube. Add 3 volumes of Buffer QG to 1 volume of gel (100mg=100  $\mu$ l).
3. Incubate at 50<sup>0</sup>C for 10 min (or until the gel slice has completely dissolved). Vortex the tube every 2-3 min to mix during the incubation.
4. After the gel slice has dissolved completely, check that the color of the mixture is yellow (similar to Buffer QC without dissolved agarose).  
If the color of the mixture is orange or violet, add 10  $\mu$ l of 3 M sodium acetate, pH5.0. the color of the mixture will turn to yellow.
5. Add 1 gel volume of isopropanol to the sample and mix.  
Do not centrifuge the sample at this stage.
6. Place a QIAquick spin column in a provided 2 ml collection tube.
7. Apply the sample to the QIAquick column and centrifuge for 1 min.  
The maximum volume of the column reservoir is 800  $\mu$ l. for the sample volumes of more than 800  $\mu$ l, simply load and spin again.
8. Discard flow-through and place QIAquick column back in the same collection tube.
9. Add 0.5 ml of Buffer QC to QIAquick column and centrifuge for 1 min to completely remove agarose traces. Discard the flow-through.
10. Add 0.75 ml of Buffer PE to QIAquick column, let it stand for 2-5 min, and centrifuge for 1 min.
11. Discard the flow-through and centrifuge the QIAquick column for an additional 1 min at 17,900  $\times$ g.
12. Place QIAquick column into a clean 1.5 ml microcentrifuge tube.
13. Add 50  $\mu$ l of water to the center of the QIAquick membrane, stand for 1 min, and centrifuge the column for 1 min.
14. Detect concentration by nanodrop and keep purified DNA at -20<sup>0</sup>C.

## Statistical and Bioinformatics Analysis

Detailed protocols for data analysis and documentation of the sensitivity, reproducibility, and other aspects of the quantitative statistical microarray analysis using Affymetrix technology have been reported previously (2-6). Forty to sixty percent of the surveyed genes were called present by Affymetrix Microarray Suite version 5.0 software in these experiments. The concordance analysis of differential gene expression across the data sets was performed using Affymetrix MicroDB version 3.0 and DMT version 3.0 software as described previously (2-6). We processed the microarray data using the Affymetrix Microarray Suite version 5.0 software and performed statistical analysis of the expression data set using the Affymetrix MicroDB and Affymetrix DMT software. The Pearson correlation coefficient for individual test samples and the appropriate reference standard were determined using GraphPad Prism version 4.00 software (GraphPad Software). We calculated the significance of the overlap between the lists of differentially-regulated genes by using the hypergeometric distribution test (9).

We analyzed expression profiling data of 697 clinical samples obtained from 185 control subjects and 350 patients diagnosed with 9 common human disorders (Table 16), including Crohn's disease (59 patients), ulcerative colitis (26 patients), rheumatoid arthritis (20 patients), Huntington's disease (17 patients), autism (15 patients), Alzheimer's disease (36 patients), obesity (14 subjects), prostate cancer (64 patients), and breast cancers (99 patients). Microarray data and associated clinical information are available in Gene Expression Omnibus (GEO) database

(<http://www.ncbi.nlm.nih.gov/geo/>) using the following accession numbers: GDS2601; GDS810; GDS2824; GDS1615; GDS711; GDS1480; GDS2545; GDS1331; GDS1407; GDS3203; GDS2255.

## Method References

1. Holt SE, Glinsky VV, Ivanova AB, Glinsky GV. Resistance to apoptosis in human cells conferred by telomerase function and telomere stability. *Mol Carcinog.* 1999; 25: 241-8.
2. Glinsky, GV. Glinskii, AB. Berezovskaya, O. Microarray analysis identifies a death-from-cancer signature predicting therapy failure in patients with multiple types of cancer. *J Clin Invest;* 2005; 115: 1503 - 1521.
3. Glinsky GV, Higashiyama T, Glinskii AB. Classification of human breast cancer using gene expression profiling as a component of the survival predictor algorithm. *Clin Cancer Res.* 2004 10: 2272-2283.
4. Glinsky GV, Glinskii AB, Stephenson AJ, Hoffman RM, Gerald WL. Gene expression profiling predicts clinical outcome of prostate cancer. *J Clin Invest.* 2004 113: 913-923.
5. Glinsky GV, Kronen-Herzig A, Glinskii AB, Gebauer G. Microarray analysis of xenograft-derived cancer cell lines representing multiple experimental models of human prostate cancer. *Mol Carcinog.* 2003 37: 209-221.
6. Glinskii, AB, Ma, J, Ma, S, Grant, D, Lim, C, Sell, S, Glinsky, GV. Identification of intergenic trans-regulatory RNAs containing a disease-linked SNP sequence and targeting cell cycle progression/differentiation pathways in multiple common human disorders. *Cell Cycle* 2009: 3925-42.
7. Khalil AM, Guttman M, Huarte M, Garber M, Raj A, Rivea Morales D, Thomas K, Presser A, Bernstein BE, van Oudenaarden A, Regev A, Lander ES, Rinn JL. Many human large intergenic noncoding RNAs associate with chromatin-modifying complexes and affect gene expression. *Proc Natl Acad Sci U S A.* 2009 Jul 1. [Epub ahead of print] PMID: 19571010.

8. Ku M, Koche RP, Rheinbay E, Mendenhall EM, Endoh M, Mikkelsen TS, Presser A, Nusbaum C, Xie X, Chi AS, Adli M, Kasif S, Ptaszek LM, Cowan CA, Lander ES, Koseki H, Bernstein BE. Genomewide analysis of PRC1 and PRC2 occupancy identifies two classes of bivalent domains. *PLoS Genet.* 2008; 4: e1000242.
9. Tavazoie, S, Hughes, JD, Campbell, MJ, Cho, RJ, Church, GM. Systematic determination of genetic network architecture. *Nat. Genet.* 1999. 22:281-285.

## SNP Variations Supplemental References

1. Wellcome Trust Case Control Consortium. Genome-wide association study of 14,000 cases of seven common diseases and 3,000 shared controls. *Nature* 2007 447: 661-678.
2. Tenesa A, Farrington SM, Prendergast JG, et al. Genome-wide association scan identifies a colorectal cancer susceptibility locus on 11q23 and replicates risk loci at 8q24 and 18q21. *Nat Genet* 2008 40: 631-7.
3. Haiman CA, Le Marchand L, Yamamoto J, Stram DO, Sheng X, Kolonel LN, Wu AH, Reich D, Henderson BE. A common genetic risk factor for colorectal and prostate cancer. *Nat Genet* 2007 39: 954-6.
4. Zeggini E, Scott LJ, Saxena R, et al. Meta-analysis of genome-wide association data and large-scale replication identifies additional susceptibility loci for type 2 diabetes. *Nat Genet* 2008 40: 638-645.
5. Barton A, Thomson W, Ke X, Eyre S, Hinks A, Bowes J, Gibbons L, Plant D; Wellcome Trust Case Control Consortium, Wilson AG, Marinou I, Morgan A, Emery P; YEAR consortium, Steer S, Hocking L, Reid DM, Wordsworth P, Harrison P, Worthington J. Re-evaluation of putative rheumatoid arthritis susceptibility genes in the post-genome wide association study era and hypothesis of a key pathway underlying susceptibility. *Hum Mol Genet.* 2008 Apr 22. [Epub ahead of print]
6. Remmers EF, Plenge RM, Lee AT, Graham RR, Hom G, Behrens TW, de Bakker PI, Le JM, Lee HS, Batliwalla F, Li W, Masters SL, Booty MG, Carulli JP, Padyukov L, Alfredsson L, Klareskog L, Chen WV, Amos CI, Criswell LA, Seldin MF, Kastner DL,

Gregersen PK. STAT4 and the risk of rheumatoid arthritis and systemic lupus erythematosus. *N Engl J Med.* 2007 357: 977-986.

7. Plenge RM, Cotsapas C, Davies L, et al. Two independent alleles at 6q23 associated with risk of rheumatoid arthritis. *Nat Genet* 2007 39: 1477-1482.
8. Thomson W, Barton A, Ke X, Eyre S, Hinks A, Bowes J, Donn R, Symmons D, Hider S, Bruce IN; Wellcome Trust Case Control Consortium, Wilson AG, Marinou I, Morgan A, Emery P; YEAR Consortium, Carter A, Steer S, Hocking L, Reid DM, Wordsworth P, Harrison P, Strachan D, Worthington J. Rheumatoid arthritis association at 6q23. *Nat Genet.* 2007 39: 1431-1433.
9. Wellcome Trust Case Control Consortium; Australo-Anglo-American Spondylitis Consortium (TASC), Burton PR, Clayton DG, Cardon LR, et al. Association scan of 14,500 nonsynonymous SNPs in four diseases identifies autoimmunity variants. *Nat Genet* 2007 39: 1329-1337.
10. International Consortium for Systemic Lupus Erythematosus Genetics (SLEGEN), Harley JB, Alarcón-Riquelme ME, Criswell LA, Jacob CO, Kimberly RP, Moser KL, Tsao BP, Vyse TJ, Langefeld CD, Nath SK, Guthridge JM, Cobb BL, Mirel DB, Marion MC, Williams AH, Divers J, Wang W, Frank SG, Namjou B, Gabriel SB, Lee AT, Gregersen PK, Behrens TW, Taylor KE, Fernando M, Zidovetzki R, Gaffney PM, Edberg JC, Rioux JD, Ojwang JO, James JA, Merrill JT, Gilkeson GS, Seldin MF, Yin H, Baechler EC, Li QZ, Wakeland EK, Bruner GR, Kaufman KM, Kelly JA. Genome-wide association scan in women with systemic lupus erythematosus identifies susceptibility variants in ITGAM, PXX, KIAA1542 and other loci. *Nat Genet* 2008 40: 204-210.

11. Nath SK, Han S, Kim-Howard X, Kelly JA, Viswanathan P, Gilkeson GS, Chen W, Zhu C, McEver RP, Kimberly RP, Alarcón-Riquelme ME, Vyse TJ, Li QZ, Wakeland EK, Merrill JT, James JA, Kaufman KM, Guthridge JM, Harley JB. A nonsynonymous functional variant in integrin-alpha(M) (encoded by ITGAM) is associated with systemic lupus erythematosus. *Nat Genet* 2008 40: 152-154.
12. Kozyrev SV, Abelson AK, Wojcik J, Zaghlool A, Linga Reddy MV, Sanchez E, Gunnarsson I, Svenungsson E, Sturfelt G, Jönsen A, Truedsson L, Pons-Estel BA, Witte T, D'Alfonso S, Barizzone N, Danieli MG, Gutierrez C, Suarez A, Junker P, Lastrup H, González-Escribano MF, Martin J, Abderrahim H, Alarcón-Riquelme ME. Functional variants in the B-cell gene BANK1 are associated with systemic lupus erythematosus. *Nat Genet* 2008 40:211-216.
13. Hom G, Graham RR, Modrek B, Taylor KE, Ortmann W, Garnier S, Lee AT, Chung SA, Ferreira RC, Pant PV, Ballinger DG, Kosoy R, Demirci FY, Kamboh MI, Kao AH, Tian C, Gunnarsson I, Bengtsson AA, Rantapää-Dahlqvist S, Petri M, Manzi S, Seldin MF, Rönnblom L, Syvänen AC, Criswell LA, Gregersen PK, Behrens TW. Association of systemic lupus erythematosus with C8orf13-BLK and ITGAM-ITGAX. *N Engl J Med*. 2008 358: 900-909.
14. Zheng SL, Sun J, Wiklund F, Smith S, Stattin P, Li G, Adami HO, Hsu FC, Zhu Y, Bälter K, Kader AK, Turner AR, Liu W, Bleecker ER, Meyers DA, Duggan D, Carpten JD, Chang BL, Isaacs WB, Xu J, Grönberg H. Cumulative association of five genetic variants with prostate cancer. *N Engl J Med* 2008 358: 910-919.
15. Gudmundsson J, Sulem P, Rafnar T, et al. Common sequence variants on 2p15 and Xp11.22 confer susceptibility to prostate cancer. *Nat Genet* 2008 40: 281-283.



16. Jin Y, Mailloux CM, Gowan K, Riccardi SL, LaBerge G, Bennett DC, Fain PR, Spritz RA. NALP1 in vitiligo-associated multiple autoimmune disease. *N Engl J Med* 2007 356: 1216-1225.
17. Fisher SA, Tremelling M, Anderson CA, et al. Genetic determinants of ulcerative colitis include the ECM1 locus and five loci implicated in Crohn's disease. *Nat Genet* 2008 40: 710-712.
18. Cox A, Dunning AM, Garcia-Closas M, et al. A common coding variant in CASP8 is associated with breast cancer risk. *Nat Genet* 2007; 39:352-8.
19. Easton DF, Pooley KA, Dunning AM, et al. Genome-wide association study identifies novel breast cancer susceptibility loci. *Nature* 2007; 447:1087-93.
20. Hunter DJ, Kraft P, Jacobs KB, et al. A genome-wide association study identifies alleles in FGFR2 associated with risk of sporadic postmenopausal breast cancer. *Nat Genet* 2007; 39:870-4.
21. Stacey SN, Manolescu A, Sulem P, et al. Common variants on chromosomes 2q35 and 16q12 confer susceptibility to estrogen receptor-positive breast cancer. *Nat Genet* 2007; 39:865-9.
22. Tomlinson IP, Webb E, Carvajal-Carmona L, et al. A genome-wide association study identifies colorectal cancer susceptibility loci on chromosomes 10p14 and 8q23.3. *Nat Genet* 2008 40: 623-30.
23. Jaeger E, Webb E, Howarth K, et al. Common genetic variants at the CRAC1 (HMPS) locus on chromosome 15q13.3 influence colorectal cancer risk. *Nat Genet.* 2008 40: 26-8.
24. Broderick P, Carvajal-Carmona L, Pittman AM, Webb E, Howarth K, Rowan A, Lubbe S, Spain S, Sullivan K, Fielding S, Jaeger E, Vijayakrishnan J, Kemp Z, Gorman M,

- Chandler I, Papaemmanuil E, Penegar S, Wood W, Sellick G, Qureshi M, Teixeira A, Domingo E, Barclay E, Martin L, Sieber O; CORGI Consortium, Kerr D, Gray R, Peto J, Cazier JB, Tomlinson I, Houlston RS. A genome-wide association study shows that common alleles of SMAD7 influence colorectal cancer risk. *Nat Genet* 2007 39: 1315-7.
25. Tomlinson I, Webb E, Carvajal-Carmona L, Broderick P, Kemp Z, Spain S, Penegar S, Chandler I, Gorman M, Wood W, Barclay E, Lubbe S, Martin L, Sellick G, Jaeger E, Hubner R, Wild R, Rowan A, Fielding S, Howarth K; CORGI Consortium, Silver A, Atkin W, Muir K, Logan R, Kerr D, Johnstone E, Sieber O, Gray R, Thomas H, Peto J, Cazier JB, Houlston R. A genome-wide association scan of tag SNPs identifies a susceptibility variant for colorectal cancer at 8q24.21. *Nat Genet.* 2007 39: 984-8.
26. Gruber SB, Moreno V, Rozek LS, Rennert HS, Lejbkowitz F, Bonner JD, Greenon JK, Giordano TJ, Fearon ER, Rennert G. Genetic Variation in 8q24 Associated with Risk of Colorectal Cancer. *Cancer Biol Ther.* 2007 6; [Epub ahead of print].
27. Carrasquillo MM, Zou F, Pankratz VS, Wilcox SL, Ma L, Walker LP, Younkin SG, Younkin CS, Younkin LH, Bisceglia GD, Ertekin-Taner N, Crook JE, Dickson DW, Petersen RC, Graff-Radford NR, Younkin SG. Genetic variation in PCDH11X is associated with susceptibility to late-onset Alzheimer's disease. *Nat Genet.* 2009 Feb;41(2):192-8.
28. Bertram L, Lange C, Mullin K, Parkinson M, Hsiao M, Hogan MF, Schjeide BM, Hooli B, Divito J, Ionita I, Jiang H, Laird N, Moscarillo T, Ohlsen KL, Elliott K, Wang X, Hu-Lince D, Ryder M, Murphy A, Wagner SL, Blacker D, Becker KD, Tanzi RE. Genome-wide association analysis reveals putative Alzheimer's disease susceptibility loci in addition to APOE. *Am J Hum Genet.* 2008 Nov;83(5):623-32.

29. Stefansson H, Rujescu D, Cichon S, Pietiläinen OP, Ingason A, Steinberg S, Fossdal R, Sigurdsson E, Sigmundsson T, Buizer-Voskamp JE, Hansen T, Jakobsen KD, Muglia P, Francks C, Matthews PM, Gylfason A, Halldorsson BV, Gudbjartsson D, Thorgeirsson TE, Sigurdsson A, Jonasdottir A, Jonasdottir A, Bjornsson A, Mattiasdottir S, Blondal T, Haraldsson M, Magnusdottir BB, Giegling I, Möller HJ, Hartmann A, Shianna KV, Ge D, Need AC, Crombie C, Fraser G, Walker N, Lonnqvist J, Suvisaari J, Tuulio-Henriksson A, Paunio T, Toulopoulou T, Bramon E, Di Forti M, Murray R, Ruggeri M, Vassos E, Tosato S, Walshe M, Li T, Vasilescu C, Mühleisen TW, Wang AG, Ullum H, Djurovic S, Melle I, Olesen J, Kiemeny LA, Franke B; GROUP, Sabatti C, Freimer NB, Gulcher JR, Thorsteinsdottir U, Kong A, Andreassen OA, Ophoff RA, Georgi A, Rietschel M, Werge T, Petursson H, Goldstein DB, Nöthen MM, Peltonen L, Collier DA, St Clair D, Stefansson K. Large recurrent microdeletions associated with schizophrenia. *Nature*. 2008 Sep 11;455(7210):232-6.
30. Amos CI, Wu X, Broderick P, Gorlov IP, Gu J, Eisen T, Dong Q, Zhang Q, Gu X, Vijayakrishnan J, Sullivan K, Matakidou A, Wang Y, Mills G, Doheny K, Tsai YY, Chen WV, Shete S, Spitz MR, Houlston RS. Genome-wide association scan of tag SNPs identifies a susceptibility locus for lung cancer at 15q25.1. *Nat Genet*. 2008 May;40(5):616-22.
31. Wang Y, Broderick P, Webb E, Wu X, Vijayakrishnan J, Matakidou A, Qureshi M, Dong Q, Gu X, Chen WV, Spitz MR, Eisen T, Amos CI, Houlston RS. Common 5p15.33 and 6p21.33 variants influence lung cancer risk. *Nat Genet*. 2008 Dec;40(12):1407-9.
32. McKay JD, Hung RJ, Gaborieau V, Boffetta P, Chabrier A, Byrnes G, Zaridze D, Mukeria A, Szeszenia-Dabrowska N, Lissowska J, Rudnai P, Fabianova E, Mates D, Bencko V, Foretova L, Janout V, McLaughlin J, Shepherd F, Montpetit A, Narod S, Krokan HE, Skorpen F, Elvestad MB, Vatten L, Njølstad I, Axelsson T, Chen C,

Goodman G, Barnett M, Loomis MM, Lubiński J, Matyjasik J, Lener M, Oszutowska D, Field J, Liloglou T, Xinarianos G, Cassidy A; EPIC Study, Vineis P, Clavel-Chapelon F, Palli D, Tumino R, Krogh V, Panico S, González CA, Ramón Quirós J, Martínez C, Navarro C, Ardanaz E, Larrañaga N, Kham KT, Key T, Bueno-de-Mesquita HB, Peeters PH, Trichopoulou A, Linseisen J, Boeing H, Hallmans G, Overvad K, Tjønneland A, Kumle M, Riboli E, Zelenika D, Boland A, Delepine M, Foglio M, Lechner D, Matsuda F, Blanche H, Gut I, Heath S, Lathrop M, Brennan P. Lung cancer susceptibility locus at 5p15.33. *Nat Genet.* 2008 Dec;40(12):1404-6.

33. Chambers JC, Elliott P, Zabaneh D, Zhang W, Li Y, Froguel P, Balding D, Scott J, Kooner JS.

Common genetic variation near MC4R is associated with waist circumference and insulin resistance. *Nat Genet.* 2008 Jun;40(6):716-8.

34. Loos RJ, Lindgren CM, Li S, Wheeler E, Zhao JH, Prokopenko I, Inouye M, Freathy RM, Attwood AP, Beckmann JS, Berndt SI; Prostate, Lung, Colorectal, and Ovarian (PLCO) Cancer Screening Trial, Jacobs KB, Chanock SJ, Hayes RB, Bergmann S, Bennett AJ, Bingham SA, Bochud M, Brown M, Cauchi S, Connell JM, Cooper C, Smith GD, Day I, Dina C, De S, Dermitzakis ET, Doney AS, Elliott KS, Elliott P, Evans DM, Sadaf Farooqi I, Froguel P, Ghorji J, Groves CJ, Gwilliam R, Hadley D, Hall AS, Hattersley AT, Hebebrand J, Heid IM; KORA, Lamina C, Gieger C, Illig T, Meitinger T, Wichmann HE, Herrera B, Hinney A, Hunt SE, Jarvelin MR, Johnson T, Jolley JD, Karpe F, Keniry A, Khaw KT, Luben RN, Mangino M, Marchini J, McArdle WL, McGinnis R, Meyre D, Munroe PB, Morris AD, Ness AR, Neville MJ, Nica AC, Ong KK, O'Rahilly S, Owen KR, Palmer CN, Papadakis K, Potter S, Pouta A, Qi L; Nurses' Health Study, Randall JC, Rayner NW, Ring SM, Sandhu MS, Scherag A, Sims MA,

Song K, Soranzo N, Speliotes EK; Diabetes Genetics Initiative, Syddall HE, Teichmann SA, Timpson NJ, Tobias JH, Uda M; SardiNIA Study, Vogel CI, Wallace C, Waterworth DM, Weedon MN; Wellcome Trust Case Control Consortium, Willer CJ; FUSION, Wraight , Yuan X, Zeggini E, Hirschhorn JN, Strachan DP, Ouwehand WH, Caulfield MJ, Samani NJ, Frayling TM, Vollenweider P, Waeber G, Mooser V, Deloukas P, McCarthy MI, Wareham NJ, Barroso I, Jacobs KB, Chanock SJ, Hayes RB, Lamina C, Gieger C, Illig T, Meitinger T, Wichmann HE, Kraft P, Hankinson SE, Hunter DJ, Hu FB, Lyon HN, Voight BF, Ridderstrale M, Groop L, Scheet P, Sanna S, Abecasis GR, Albai G, Nagaraja R, Schlessinger D, Jackson AU, Tuomilehto J, Collins FS, Boehnke M, Mohlke KL. Common variants near MC4R are associated with fat mass, weight and risk of obesity. *Nat Genet.* 2008 Jun;40(6):768-75.

35. Scuteri A, Sanna S, Chen WM, Uda M, Albai G, Strait J, Najjar S, Nagaraja R, Orrú M, Usala G, Dei M, Lai S, Maschio A, Busonero F, Mulas A, Ehret GB, Fink AA, Weder AB, Cooper RS, Galan P, Chakravarti A, Schlessinger D, Cao A, Lakatta E, Abecasis GR. Genome-wide association scan shows genetic variants in the FTO gene are associated with obesity-related traits. *PLoS Genet.* 2007 Jul;3(7):e115.

36. Hinney A, Nguyen TT, Scherag A, Friedel S, Brönner G, Müller TD, Grallert H, Illig T, Wichmann HE, Rief W, Schäfer H, Hebebrand J. Genome wide association (GWA) study for early onset extreme obesity supports the role of fat mass and obesity associated gene (FTO) variants. *PLoS ONE.* 2007 Dec 26;2(12):e1361.

37. Frayling TM, Timpson NJ, Weedon MN, Zeggini E, Freathy RM, Lindgren CM, Perry JR, Elliott KS, Lango H, Rayner NW, Shields B, Harries LW, Barrett JC, Ellard S, Groves CJ, Knight B, Patch AM, Ness AR, Ebrahim S, Lawlor DA, Ring SM, Ben-Shlomo Y, Jarvelin MR, Sovio U, Bennett AJ, Melzer

D, Ferrucci L, Loos RJ, Barroso I, Wareham NJ, Karpe F, Owen KR, Cardon LR, Walker M, Hitman GA, Palmer CN, Doney AS, Morris AD, Smith GD, Hattersley AT, McCarthy MI. A common variant in the FTO gene is associated with body mass index and predisposes to childhood and adult obesity. *Science*. 2007 May 11;316(5826):889-94.

38. Hunt SC, Stone S, Xin Y, Scherer CA, Magness CL, Iadonato SP, Hopkins PN, Adams TD.

Association of the FTO gene with BMI. *Obesity (Silver Spring)*. 2008 Apr;16(4):902-4.

39. Do R, Bailey SD, Desbiens K, Belisle A, Montpetit A, Bouchard C, Pérusse L, Vohl MC, Engert JC.

Genetic variants of FTO influence adiposity, insulin sensitivity, leptin levels, and resting metabolic rate in the Quebec Family Study. *Diabetes*. 2008 Apr;57(4):1147-50.

40. Grant SF, Li M, Bradfield JP, Kim CE, Annaiah K, Santa E, Glessner JT, Casalunovo T, Frackelton

EC, Otieno FG, Shaner JL, Smith RM, Imielinski M, Eckert AW, Chiavacci RM, Berkowitz RI,

Hakonarson H. Association analysis of the FTO gene with obesity in children of Caucasian and African ancestry reveals a common tagging SNP. *PLoS ONE*. 2008 Mar 12;3(3):e1746.

41. Al-Attar SA, Pollex RL, Ban MR, Young TK, Bjerregaard P, Anand SS, Yusuf S, Zinman B, Harris SB,

Hanley AJ, Connelly PW, Huff MW, Hegele RA. Association between the FTO rs9939609

polymorphism and the metabolic syndrome in a non-Caucasian multi-ethnic sample. *Cardiovasc Diabetol*. 2008 Mar 13;7:5.

42. Hotta K, Nakata Y, Matsuo T, Kamohara S, Kotani K, Komatsu R, Itoh N, Mineo I, Wada J,

Masuzaki H, Yoneda M, Nakajima A, Miyazaki S, Tokunaga K, Kawamoto M, Funahashi T,

Hamaguchi K, Yamada K, Hanafusa T, Oikawa S, Yoshimatsu H, Nakao K, Sakata T, Matsuzawa Y,

Tanaka K, Kamatani N, Nakamura Y. Variations in the FTO gene are associated with severe obesity in the Japanese. *J Hum Genet*. 2008;53(6):546-53.

43. Villani AC, Lemire M, Fortin G, Louis E, Silverberg MS, Collette C, Baba N, Libioulle C, Belaiche J, Bitton A, Gaudet D, Cohen A, Langelier D, Fortin PR, Wither JE, Sarfati M, Rutgeerts P, Rioux JD, Vermeire S, Hudson TJ, Franchimont D. Common variants in the NLRP3 region contribute to Crohn's disease susceptibility. *Nat Genet.* 2009 Jan;41(1):71-6.

## Supplemental Figure legends

**Supplemental Figure S1.** Identification and characterization of intergenic SNP-RNAs containing SNPs associated with increased risk of developing 21 common human disorders.

A, Majority of disease-linked SNPs identified to date in GWAS is located within introns (29%) or non-genic (39%) regions of human genomes which have no direct relations to known protein-coding sequences, microRNAs, or lincRNA genes.

B, Genome-wide chromosome position mapping of identified in this study SNP-RNAs containing SNPs with documented associations with 21 common human disorders.

C, D. Panels C and D show sequence alignments of 14 evolutionary conserved human SNP-RNAs and corresponding sequences of the mouse genome. Positions of disease-linked SNP nucleotides in human SNP-RNA sequences are underlined.

**Supplemental Figure S2.** Chromatin state map analysis of genomic sequences encoding evolutionary conserved transRNAs reveals a consensus chromatin domain signature comprising histone H3K27Me3, CBP/CREB, EZH2, and POL2 proteins. Chromatin state maps of corresponding human and mouse genome sequences are visualized using the custom tracks of the UCSC Genome Browser. Color-coded horizontal lines depict alignments of DNA sequences derived from Chip-Seq experiments using antibodies against corresponding proteins. Each color-coded horizontal line represents data from independent biological replicates. Note nearly ubiquitous alignments of the evolutionary-conserved transRNA-encoding sequences within binding sites of the histone H3K27Me3, CBP/CREB, EZH2, and POL2 proteins. Positions of disease-linked SNP nucleotides within transRNA-encoding sequences are indicated by arrows and vertical lines. Original experiments describing the corresponding mouse and human genome-wide chromatin state maps were reported elsewhere (5, 6).

**Supplemental Figure S3.** Chromatin state map analysis of genomic sequences encoding non-conserved human transRNAs reveals a consensus chromatin domain signature comprising histone H3K27Me3 and EZH2 proteins. Chromatin state maps of individual transRNA-encoding genomic sequences in human embryonic stem cells are visualized using the custom tracks of the UCSC Genome Browser. Color-coded horizontal lines depict alignments of DNA sequences derived from Chip-Seq experiments using antibodies against corresponding proteins. Individual zoom-in chromatin state maps aligned to corresponding transRNA-encoding sequences are shown in groups segregated according to phenotypes associated with the corresponding disease-linked SNPs. Chromatin state maps of extended genomic segments are shown when multiple disease-linked SNPs were identified within continuous genomic regions (size of ~100 kb or less) in addition to individual zoom-in chromatin state maps aligned to corresponding transRNA-encoding sequences. Each color-coded horizontal line represents data from independent biological replicates. Note nearly ubiquitous alignments of the positions of disease-linked SNP nucleotides within binding sites of the histone H3K27Me3 and Polycomb proteins (EZH2 and/or RING1B).



Positions of disease-linked SNP nucleotides within transRNA-encoding sequences are indicated by vertical lines. Original experiments describing the corresponding mouse and human genome-wide chromatin state maps were reported elsewhere (6).

**Supplemental Figure S4.** Chromatin State Signatures of 43 IDAGL defined by ENCODE data and visualized using UCSC Genome Browser (<http://genome.ucsc.edu/ENCODE/>).

**Supplemental Figure S5.** Examples of allele-specific secondary structures of identified to date disease-associated transRNAs. Arrows indicate the positions of nucleotide variations which are associated with increased risk of developing corresponding disorders. Note that disease-linked SNPs are often located within the loop structures of transRNAs and transRNAs containing SNP variants have distinct secondary structures. Note that loop sequences of many identified to date SNP sequence-bearing intergenic and intronic transRNAs have 8-11 nt segments (which include SNP nucleotides) identical to primary sequences of microRNAs, which suggest that one of the mechanisms of transRNA bioactivity may be associated with modulation of the biogenesis and functions of selected microRNAs (11-17). Bottom right panel shows alignments of the microRNA target sites in human PC-susceptibility transRNA A21. Individual human microRNAs (short horizontal bars) aligned along the A21 transRNA sequence according to the positions of respective target sites. Single vertical bar marks the position of PC-predisposition SNP. Note that a vast majority of microRNA target sites segregates to the A21 transRNA segment around PC-predisposition SNP and includes SNP nucleotide.

**Supplemental Figure S6.** Allele-specific effects of *NALP1*-locus transRNAs on expression of distinct classes of non-coding RNAs in human cells.

A, Microarray analysis of human BJ1 cells engineered to stably express distinct allelic variants of the *NALP1*-locus transRNAs reveals allele-specific alterations of expression levels of multiple distinct classes of non-coding RNAs which include snoRNAs and snoRNA-host genes (*SNORD113*; *SNHG1*; *SNHG3*; *SNHG8*), long non-coding RNAs (*MEG3*, *tncRNA*, and *MALAT1*), microRNAs, microRNA-precursors, and protein-coding microRNA-host genes (*ATAD2*; *KIAA1199*). Note that changes of expression of intron-residing microRNAs miR-548d (intron of the *ATAD2* gene) and miR-549 (intron of the *KIAA1199* gene) are in good correspondence with allele-specific expression levels of corresponding microRNA-host genes which suggest a coordinated mechanism of regulation.

B, ABI PCR-based screen identifies a statistically significant set of 36 microRNAs expression of which is altered at least 1.5-fold in *NALP1*-locus transRNA-expressing cells compared to control BJ1/EGFP cells and differentially regulated in pathology-linked G-allele-expressing BJ1 cells compared to the ancestral A-allele-expressing cells. Note that 18 of 36 (50%) of these microRNAs are derived from the single microRNA cluster on ~ 200 kb continuous region of 14q32 band of chromosome 14, which suggest that 14q32 cluster microRNAs may be primary molecular targets of the *NALP1*-locus transRNAs.

**Supplemental Figure S7.** Sequence homology profiling of *NALP1*-locus transRNAs and transRNA-regulated microRNAs and long non-coding RNAs identifies extensive sequence homology/complementarity features.

A, Genomic location (top left figure), secondary structures of 152 nt (bottom left figure) and 52 nt (top right figure) transRNA molecules, and position of the microRNA-target sites along the 152 nt transRNA sequence (bottom right figure) of *NALP1*-locus transRNAs containing SNP rs2670660.

B, Visualization of individual microRNA-target sites within the *NALP1*-locus transRNA molecule. Note that all 36 *NALP1*-locus transRNA-regulated microRNAs (Figure 5, main text) have at least one potential target sites within 152 nt sequence of the *NALP1*-locus transRNA molecule and many microRNA target sites manifest allele-associated changes of the minimal free energy (mfe) transRNA/microRNA hybridization.

C, D, microRNAs which are differentially regulated in BJ1 cells expressing distinct allelic variants of the *NALP1*-locus transRNAs share multiple sequence identity segments of at least 11 nucleotides in length with sequences of transRNA-regulated *MEG3* (C) and *MALAT1* (D) long non-coding RNAs.

**Supplemental Figure S8.** Allele affinity model of transRNA-mediated regulation of microRNA expression and activity. A-C, high affinity (low mfe) transRNA alleles facilitate increase abundance levels of corresponding microRNAs. Inverse correlation between allele-specific changes in minimal free energy (mfe) of transRNA/microRNA hybridization and experimentally-defined changes of microRNA expression and activity that is lower mfe values correspond to higher levels of microRNA expression and activity. These relationships are shown for microRNAs the abundance levels of which in human cells are induced (miR-302a; miR-629; miR-548d; miR-200a; miR-627; miR-770-5p) or repressed (miR-133a; miR-20b; miR-205; let-7b) by forced expression of pathology-linked G-allele transRNAs compared to ancestral A-allele-expressing cells. Insert bars show the results Q-PCR analysis of expression of corresponding microRNAs.

D, Luciferase reporter assay of miR-205 and let-7b activities in early-passage RWPE1 cells stably expressing distinct allelic variants of the *NALP1*-locus transRNAs demonstrates increased activity of both microRNAs in high affinity ancestral A-allele-expressing cells compared to low affinity pathology-linked G-allele-expressing cells.

E, Application of the allele affinity model of transRNA-mediated regulation of microRNA expression and activity to development of the allele equilibrium hypothesis explaining the phenotype-altering effects of transRNAs as the consequence of direct actions on microRNAs abundance and activity and down-stream effects of transRNA-regulated microRNAs on expression of protein-coding genes.

**Supplemental Figure S9.** Forced expression of transRNA-regulated microRNAs recapitulates transRNA-induced epigenetic and phenotypic features in human cells. A-E, Epigenetic regulatory “cross-talk” between *NALP1*-locus transRNAs and proto-oncogenic cancer-susceptibility transRNAs and altered expression profiles of cancer susceptibility transRNAs in human cell lines engineered to express selected transRNA-regulated “stemness” microRNAs.

Panels A-D show the results of validation experiments confirming the specificity of expression of selected microRNAs in GFP-tagged cell lines genetically engineered to stably over-express individual microRNAs or desired combinations of 2 or 3 microRNAs of interest using microarray (A) or Q-RT-PCR (B-D) methods. These cell lines are utilized in experiments designed to determine whether selected microRNAs are essential integral components of transRNA regulatory networks.

E, Distinct expression profiles of transRNA-regulated microRNAs and 6 breast cancer (BC)-susceptibility transRNAs (top-right) and 11 prostate cancer (PC)-susceptibility transRNAs (bottom-left) in human cells. Top left panels of bars show the results of the Q-RT-PCR experiments validating increased expression of miR-375, miR-20b, and miR-205 microRNAs in human cells stably expressing ancestral A-allele *NALP1*-locus transRNAs compared to the pathology-linked G-allele-expressing cells. Forced expression of *NALP1*-locus transRNAs erases epigenetic transcriptional memory of mesenchymal BJ1 cells and induces expression of multiple proto-oncogenic transRNAs (red circles). Bottom gels show expression patterns of cancer-susceptibility transRNAs in BJ1 cells genetically engineered to over-express selected transRNA-regulated microRNAs such as the individual “stemness” microRNAs (miR-205; miR-375; miR-20b) or desired combinations of “stemness” microRNAs. Note that increased expression of 8 cancer susceptibility transRNAs marked in boxes (A7; A8; A11; A18; A21; B5; B6; B7) induced by selected transRNA-regulated “stemness” microRNAs recapitulates the pattern of increased expression induced by *NALP1*-locus autoimmunity transRNAs.

Bottom right figure shows hierarchical clustering of transRNA expression profiling data. Note that expression of selected transRNA-regulated “stemness” microRNAs induces expression patterns of cancer-susceptibility transRNAs in mesenchymal BJ1 cells which recapitulate transRNA expression profiles in epithelial cells, RWPE1 and HME1, and BJ1 cells engineered to stably express *NALP1*-locus transRNA A-allele (BJ1\_2 cells).

F, Forced expression of selected transRNA-regulated microRNAs recapitulate transRNA-induced phenotypic changes in human cells. Note that the increased clonogenic growth potential which is conferred by stable expression of the ancestral A-allele compared to the pathology-linked G-allele (ref. 4 and two far left bars in the bottom panel) is recapitulated by stable expression of the A-allele-induced microRNAs, miR-205 and miR-20b. Average values of triplicate measurements of biological replicates normalized to control values obtained for BJ1/EGFP cells are shown. Top figures show typical colony staining patterns of one of the experiments.

**Supplemental Figure S10.** Identification of “stemness” microRNA signatures in blood-borne human prostate carcinoma (PC) metastasis precursor cells (Xp11; 4q21 clone in panels A; C), clinical PC samples (B; H), human PC cell lines selected for increased malignant potential in vivo (F; G), and normal human BJ cells engineered to constitutively express *NALP1*-locus autoimmunity transRNAs (Figure 1, main text). Genome-wide micro-RNA expression profiles for indicated cell lines, clinical samples, and human embryonic cell lines (hESC; panels A; B; H) were obtained using microarray, Q-RT-PCR, and high-throughput sequencing technologies and utilized to identify “stemness” micro-RNA signatures. Common sets of top-ranked up-regulated

“stemness” micro-RNAs (arrows) were identified for multiple pair-wise comparisons using hESC expression profiles as multidimensional reference vectors (1). Using this strategy, miR-20b, miR-375, miR-205, and miR-486 were selected for functional validation experiments (1). Panel D shows the results of luciferase reporter assay for assessment of miR-205 activity. Note that miR-205 activity is significantly higher in triple-transfected cells (miR-205; miR-375; miR-20b) compared to single-transfected cells (miR-205) despite having similar levels of miR-205 expression. Consistent with the proposed role in promoting malignant features of normal prostate epithelial cells, *NALP1*-locus SNP-RNA-regulated ‘stemness’ microRNAs enhance colony formation ability in agar of RWPE1 normal prostate epithelial cells (1).

Figure S1.

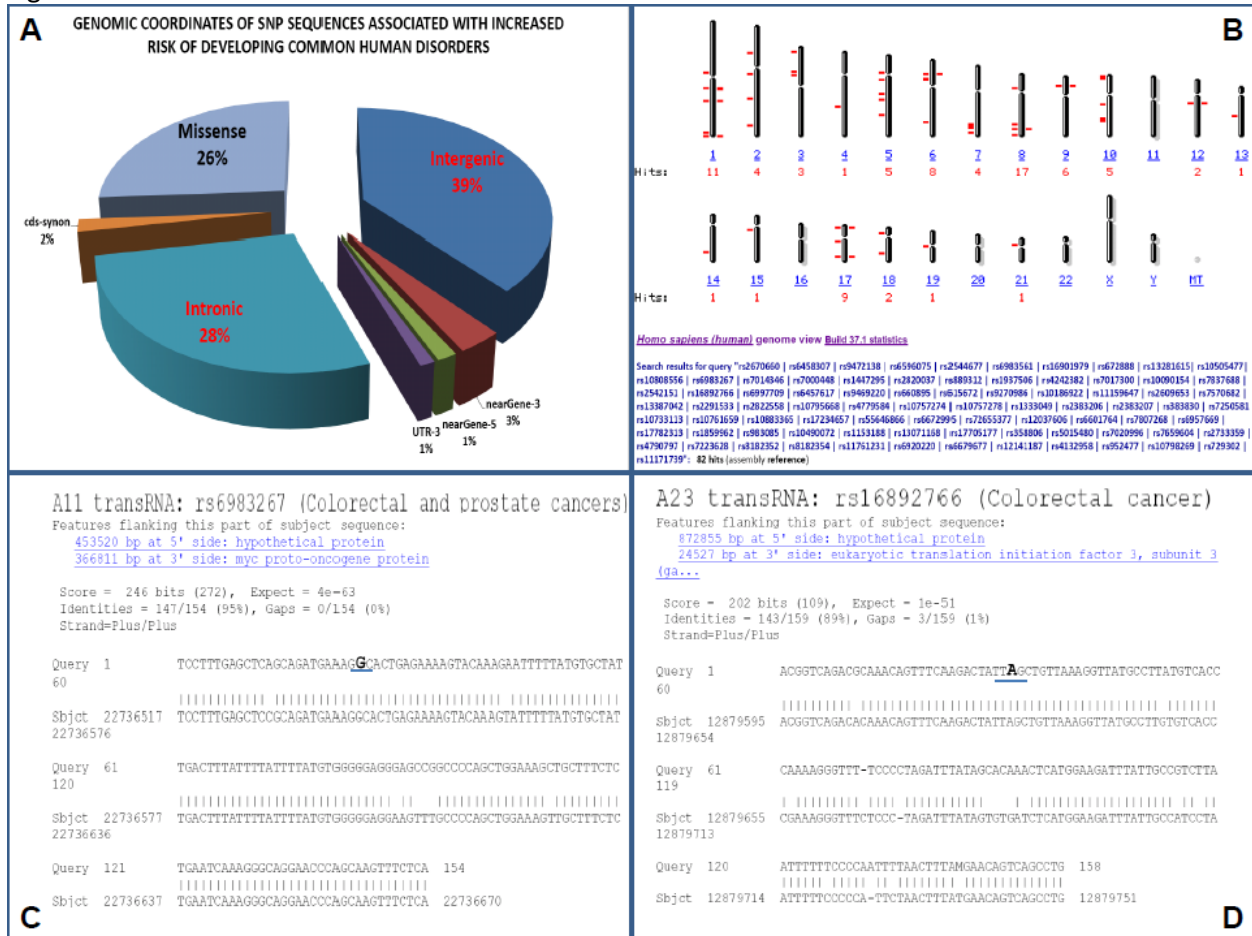

**NALP1 locus transRNA (rs2670660)**

Features flanking this part of subject sequence:  
 85717 bp at 5' side: [NACHT-, LRR-, and PYD-containing 1 paralog c](#)  
 392858 bp at 3' side: [WSC domain containing 1](#)

Score = 50.0 bits (54), Expect = 6e-04  
 Identities = 53/70 (75%), Gaps = 0/70 (0%)  
 Strand=Plus/Plus

Query 1 CGAGGCACAAGTGATCTACCAGTCTTTTAAATTCATATATAAAACCAACATGCTCT  
 60  
 ||| || |||| | |||| | |||| |||| |||| ||| ||| ||| ||||| |  
 Sbjct 36685302 CCGATGCTCAAGAAACCTACTGATCTTTTAAATTCGTTTCTAAATCTCCAACATGCTTT  
 36685361

Query 61 TTCATTTCOA 70  
 ||||| |||||  
 Sbjct 36685362 AGCATTTCOA 36685371

**E3 transRNA: rs3803662 (Breast cancer)**

Features flanking this part of subject sequence:  
 5742 bp at 5' side: [trinucleotide repeat containing 9](#)  
 362864 bp at 3' side: [hypothetical protein](#)

Score = 134 bits (148), Expect = 3e-29  
 Identities = 136/174 (78%), Gaps = 10/174 (5%)  
 Strand=Plus/Minus

Query 52 GATCTGTCAT-AGAAGGGTTTAATTATATGTGCTTAAGSATTTCCTCTTAATGCTC 110  
 ||||| ||||| ||||| ||| |||| | ||| ||||| ||||| ||||| ||||| ||||| |||||  
 Sbjct 17711113 GATCTGTCATGAGAGGCTTCAATATATGTTTAAAGSATTTCCTCTCTCATTCOCC 17711054

Query 111 TATAGCTGTCCTTAGGAGAGATAAAACCTGGACTGACC-----CCACCCATTGGG 165  
 ||||| | ||||| ||||| ||||| ||||| ||||| ||||| ||||| ||||| ||||| |||||  
 Sbjct 17711053 TATAGCTATCCTTAGTGAAGAAATAAAA-TCTGAGATTGACCCCTCCACCCATTGGA 17710995

Query 166 AAGAAAGTACTGGGCTTCCAGCTTTCATGTTTCAGCCGGTGGCTTTTGGGACA 219  
 ||||| ||||| ||||| ||||| ||||| ||||| ||||| ||||| ||||| ||||| |||||  
 Sbjct 17710994 GAGAAATACTGTCTTCCAGCTTTCATGTTTTCAGC---TGGGCTTTGTTGGCA 17710944

**E12 transRNA: rs2736990 (Parkinson's disease)**

Features in this part of subject sequence:  
[synuclein, alpha](#)  
[synuclein, alpha](#)

Score = 75.2 bits (82), Expect = 2e-11  
 Identities = 102/142 (71%), Gaps = 9/142 (6%)  
 Strand=Plus/Minus

Query 1 ATGTTGGCTTTCATAGATATGGCTTACAAGTAACTCTCTCTG-CTCCCTGTTAC 59  
 ||||| ||||| ||||| ||||| ||||| ||||| ||||| ||||| ||||| ||||| ||||| |||||  
 Sbjct 13024796 ATGTTGGCTTTCATAGATATGGCTTACAAGTAACTCTCTCTGCTCCCTGTTAC 13024737

Query 60 ACACATATAGTCTTCTCTTAACAGCTCATAGGTTGAAGAAAGACTCAGATTTCGA 119  
 ||||| ||||| ||||| ||||| ||||| ||||| ||||| ||||| ||||| ||||| ||||| |||||  
 Sbjct 13024736 ACACATATAGTCTTCTCTTAACAGCTCATAGGTTGAAGAAAGACTCAGATTTCGA 13024677

Query 120 CTATGTAATGATAAATACACA 141  
 | ||||| ||||| |||||  
 Sbjct 13024676 C-----TGTATATACACA 13024663

**A16 transRNA: rs889312 (Breast cancer)**

Features flanking this part of subject sequence:  
 59455 bp at 5' side: [mitogen activated protein kinase Kinase Kinase 1](#)  
 345311 bp at 3' side: [hypothetical protein](#)

Score = 89.7 bits (98), Expect = 2e-16  
 Identities = 60/67 (89%), Gaps = 0/67 (0%)  
 Strand=Plus/Minus

Query 1 ATGCCCTGCTGGAGAAAGGAATGTCACAAATTAAGAGACTACAAATCAGTTGAAAAC 60  
 ||||| ||||| ||||| ||||| ||||| ||||| ||||| ||||| ||||| ||||| ||||| |||||  
 Sbjct 19867347 ATGCCCTGCTGGAGAAAGGAATGTCACAAATTAAGAGACTACAAATCAGTTGAAAAC 19867288

Query 61 AACGACT 67  
 | |||||  
 Sbjct 19867287 ACTGACT 19867281

**A9 transRNA: rs10505477 (Prostate cancer)**

Features flanking this part of subject sequence:  
 446299 bp at 3' side: [hypothetical protein](#)  
 374115 bp at 3' side: [myc proto-oncogene protein](#)

Score = 57.2 bits (62), Expect = 3e-06  
 Identities = 55/71 (77%), Gaps = 0/71 (0%)  
 Strand=Plus/Minus

Query 37 TGTGATGTGTCACCACTTGTCTATCAACAGGAAGCCTTAATTGGAGATGAAGATTAGA 96  
 ||||| ||||| ||||| ||||| ||||| ||||| ||||| ||||| ||||| ||||| ||||| |||||  
 Sbjct 22729366 TGTGATGTGTCACCACTTGTCTATCAACAGGAAGCCTTCTTTGAGGATGGAGATTAGA 22729307

Query 97 AAAGGGGCAAA 107  
 ||| | |||||  
 Sbjct 22729306 AAAAGGACAAA 22729296

**A6 transRNA: rs16901979 (Prostate cancer)**

Features flanking this part of subject sequence:  
 190292 bp at 5' side: [hypothetical protein](#)  
 630042 bp at 3' side: [myc proto-oncogene protein](#)

Score = 82.4 bits (90), Expect = 1e-13  
 Identities = 111/132 (73%), Gaps = 2/132 (1%)  
 Strand=Plus/Plus

Query 36 AGCATTACTTATATCTGGCAATGGTATTTTGGATAACATGTTATGGAGAAAGTGAA 95  
 ||||| ||||| ||||| ||||| ||||| ||||| ||||| ||||| ||||| ||||| ||||| |||||  
 Sbjct 22473289 AGCATTACTTATATAGGGCAACACTGATTAT-AGATATTGTGATGTGTAAAGAGTAAA 22473347

Query 96 CTGACTTGGAAAGTTGAAGATCTCGATTGAGTATCAITTCG-CCTCACTACTTGCA 154  
 | ||||| ||||| ||||| ||||| ||||| ||||| ||||| ||||| ||||| ||||| |||||  
 Sbjct 22473348 CCAGACTTGGAAAGTTGAAGATCTCGATTGAGTATCAITTCG-CCTCACTACTTGCA 22473407

Query 155 TTAAGTTGTACAAGTCAATCAACCCCTCGAA 186  
 | ||||| ||||| ||||| ||||| ||||| ||||| ||||| ||||| ||||| ||||| |||||  
 Sbjct 22473408 TGAAGTTGTACAAGTCAATCAACCCCTCGAA 22473439



Figure S2.

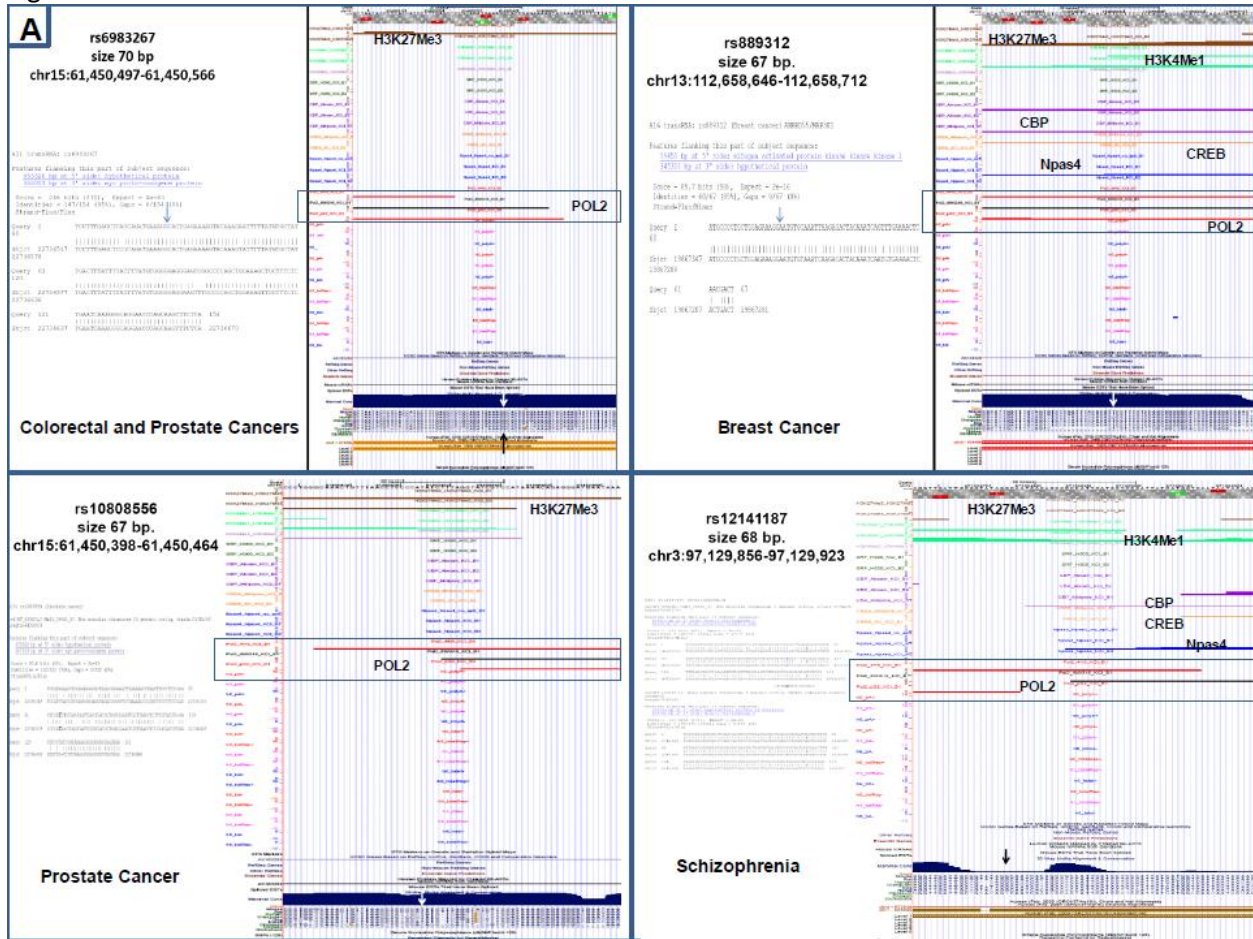





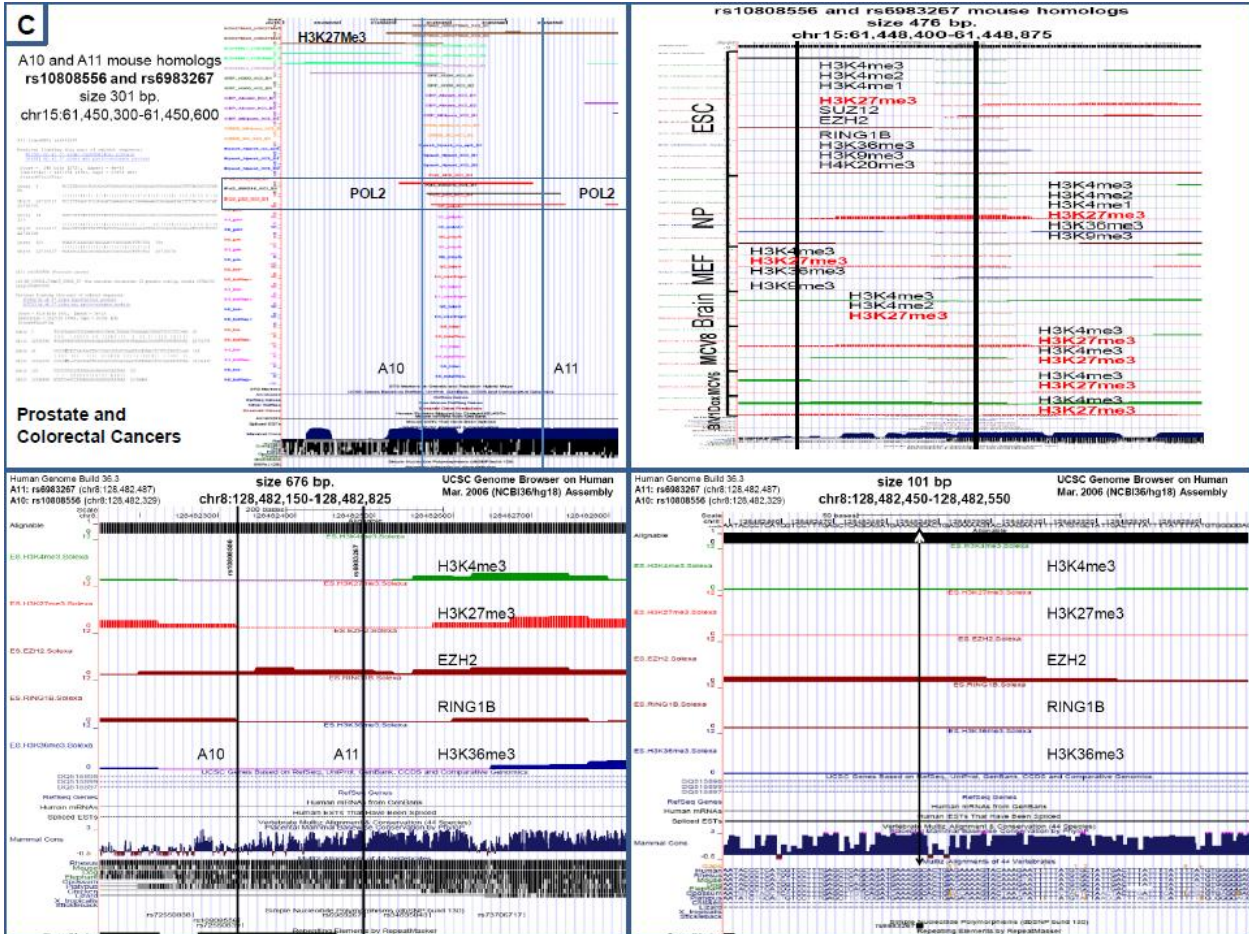



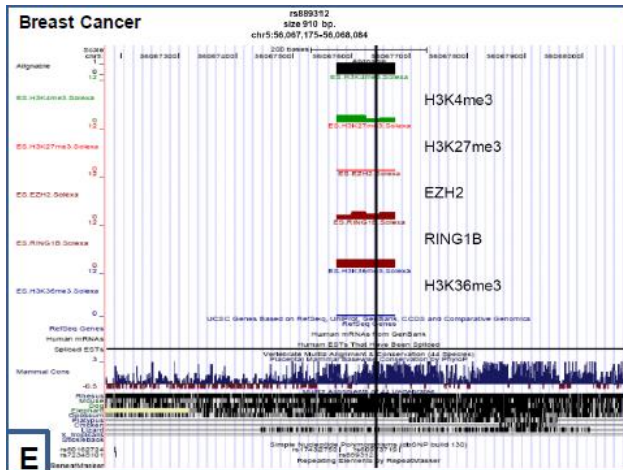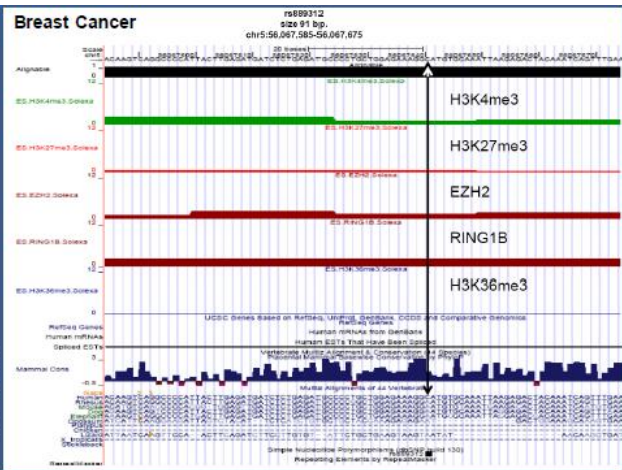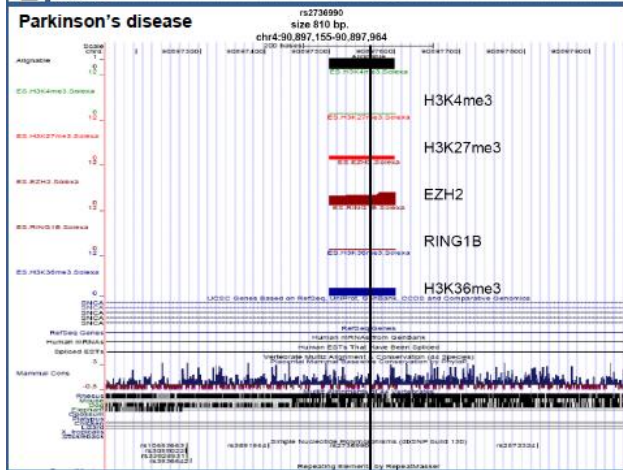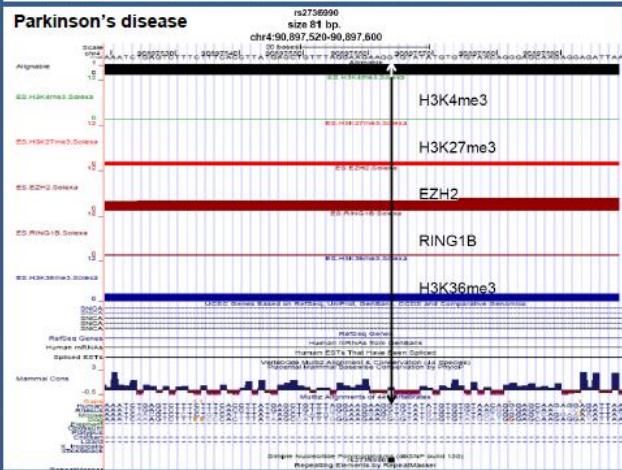





**B****Type 2 diabetes**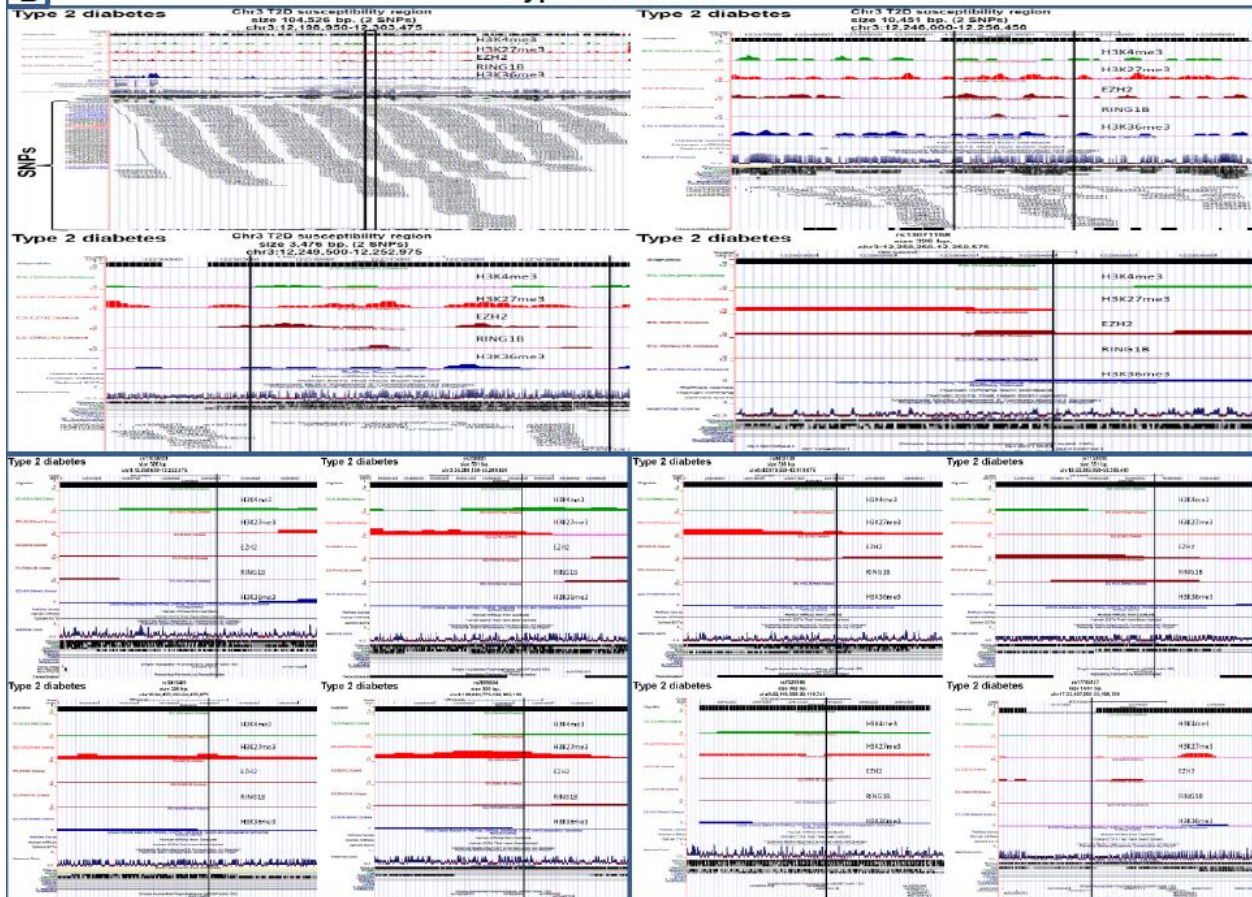

C

### Crohn's disease

Crohn's disease susceptibility region  
size 2,651 bp.  
chr1:245,686,700-245,689,350

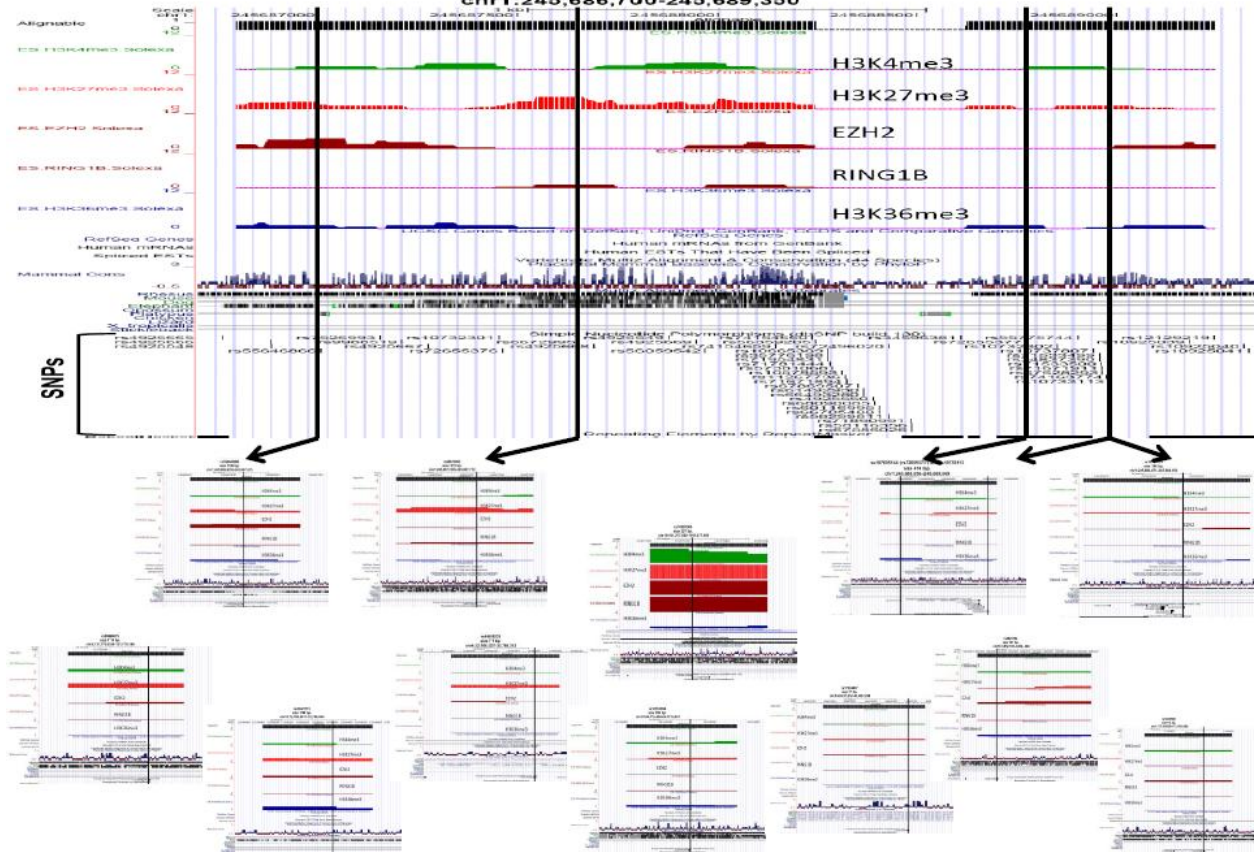



D

### Crohn's disease

Chr5p13.1 Crohn's disease susceptibility region  
size 38,551 bp.  
chr5:40,428,450-40,467,000

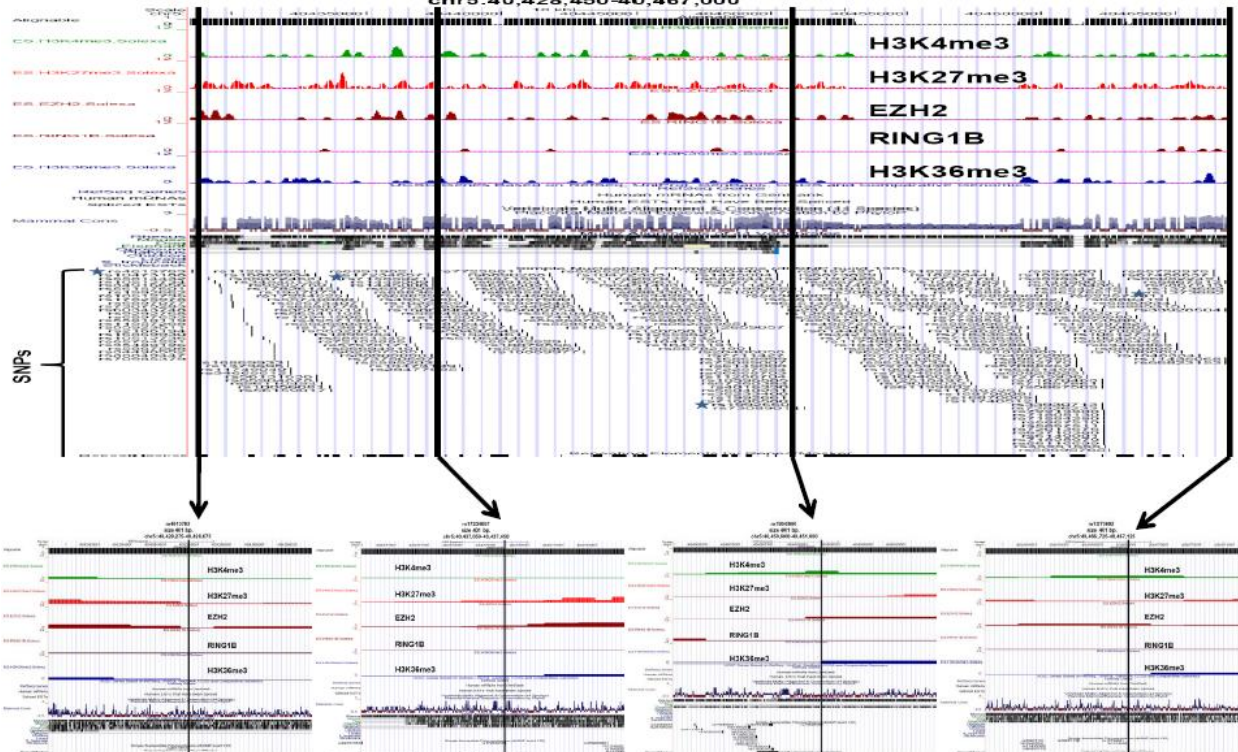



**F**

# Longevity phenotype

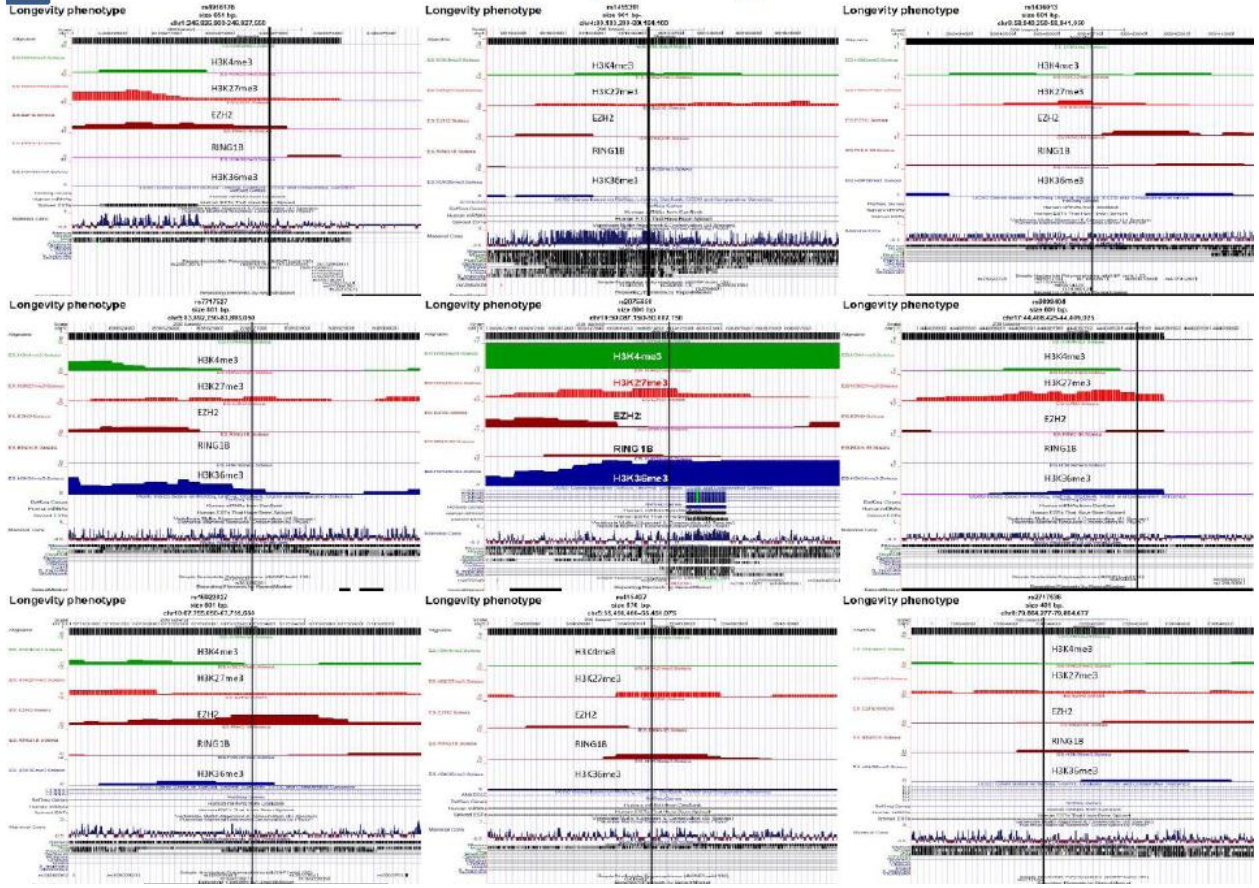

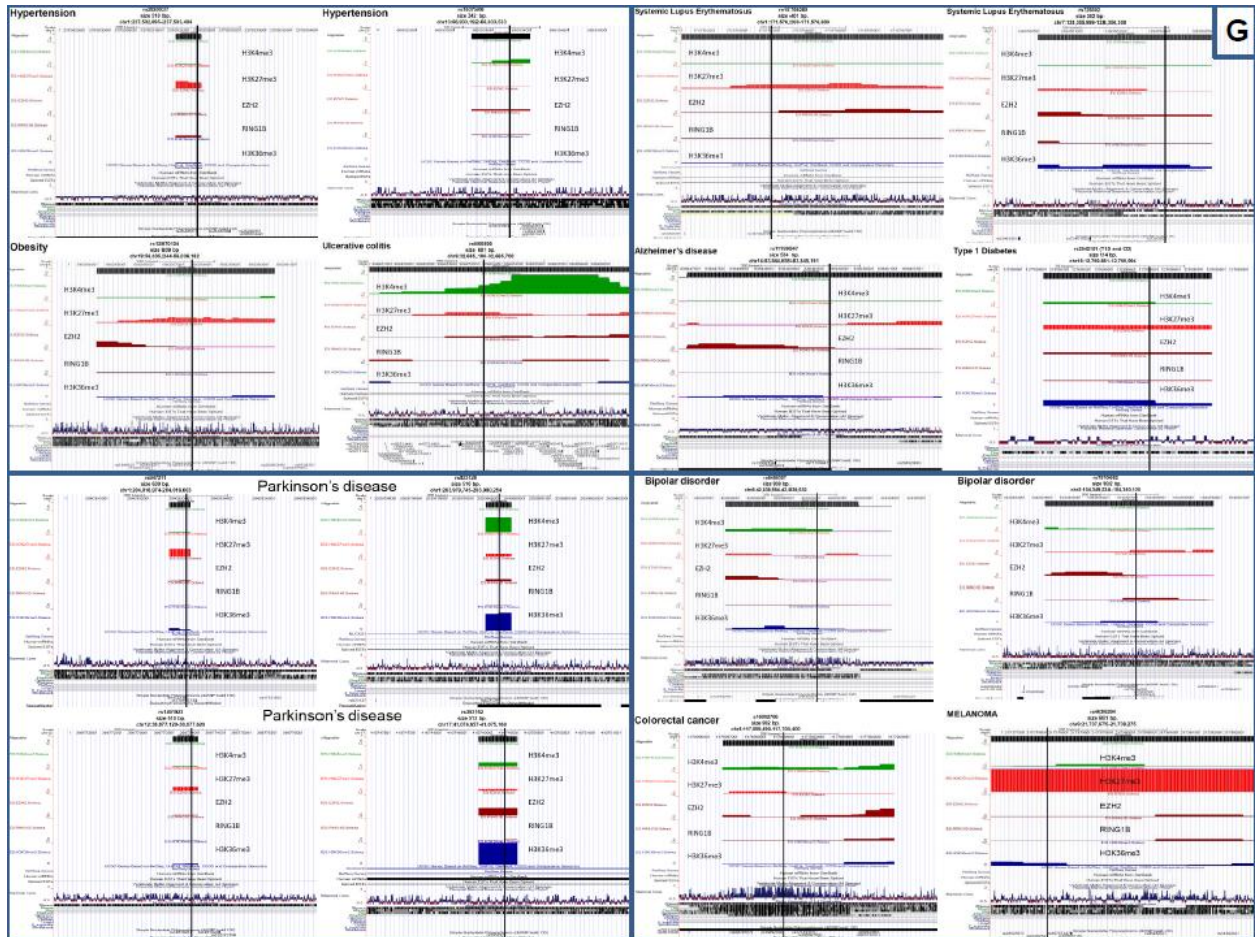

Figure S4.

Supplemental Figure S4

# Chromatin State Signatures of 43 IDAGL

# Chromatin state map signatures of IDAGL

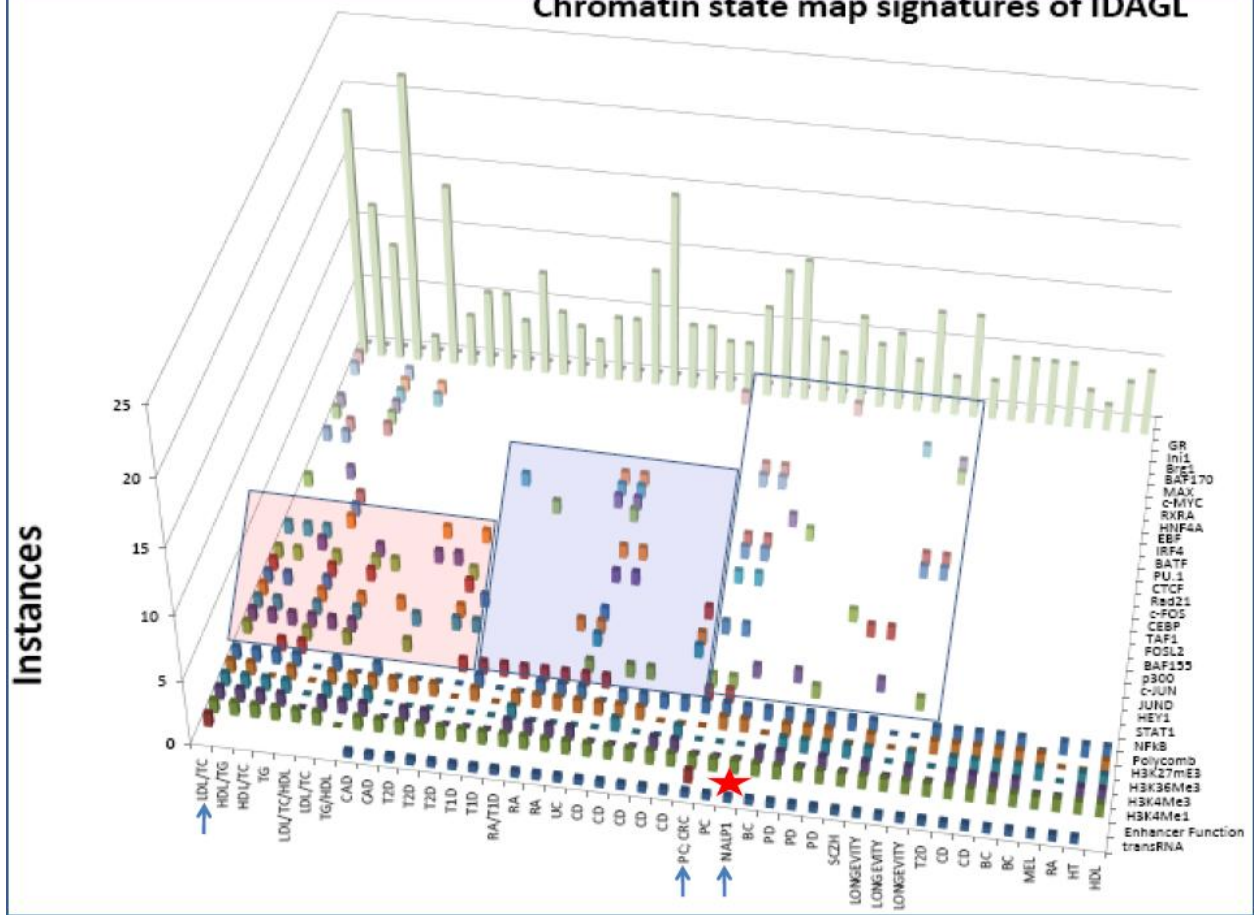

### Transcription factors map of IDAGL

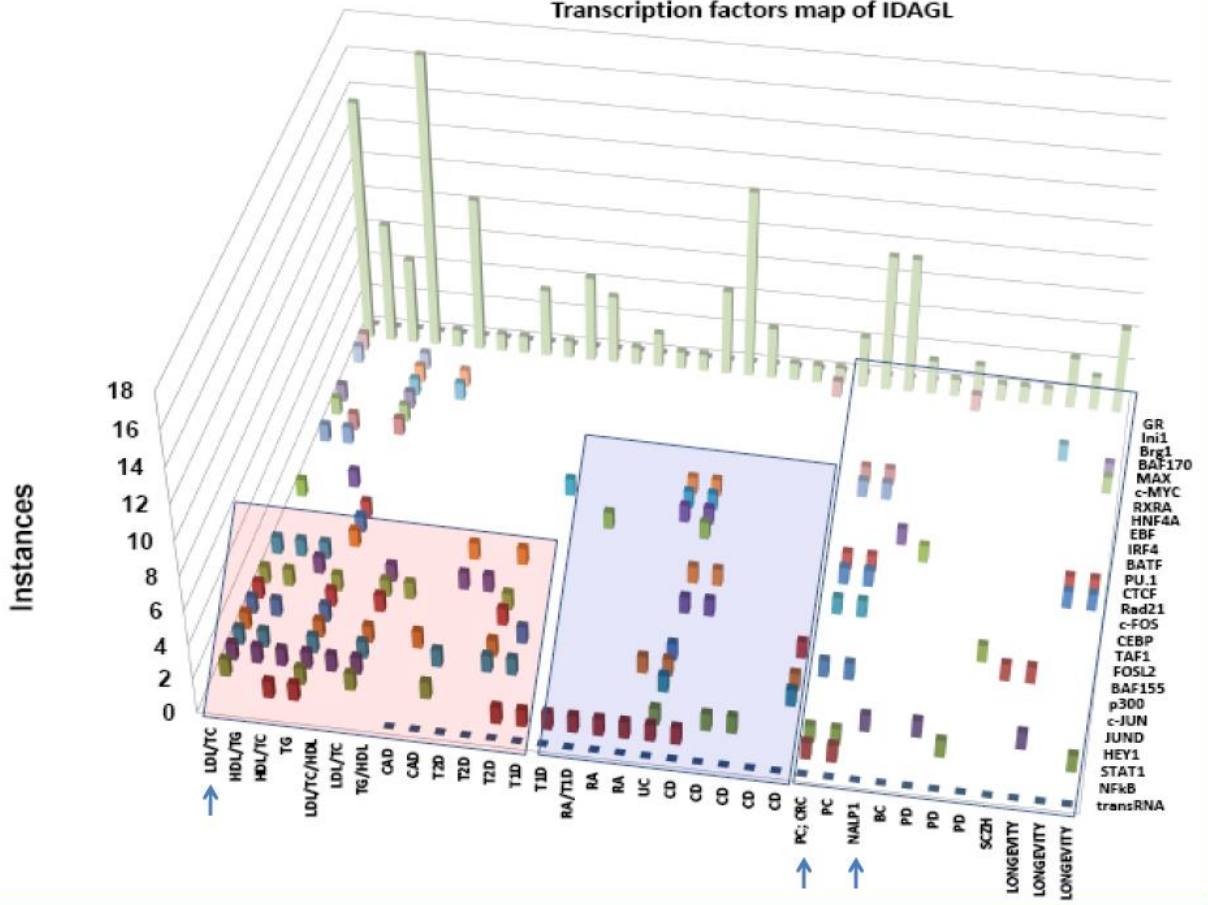

LDL/TC rs12740374  
 size 2,001 bp.  
 chr1:109,618,000-109,620,000

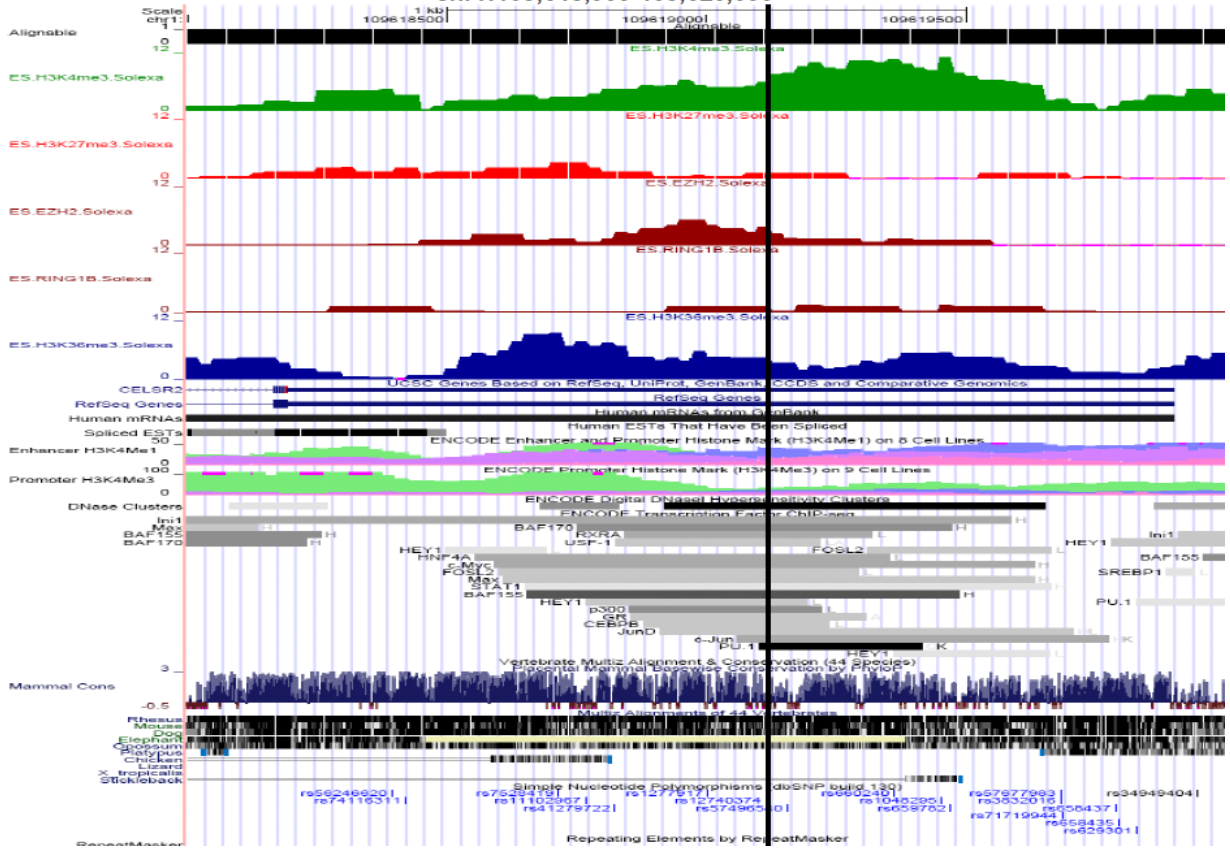





HDL/TC TTC39B rs581080  
size 1,001 bp.  
chr9:15,295,200-15,296,200

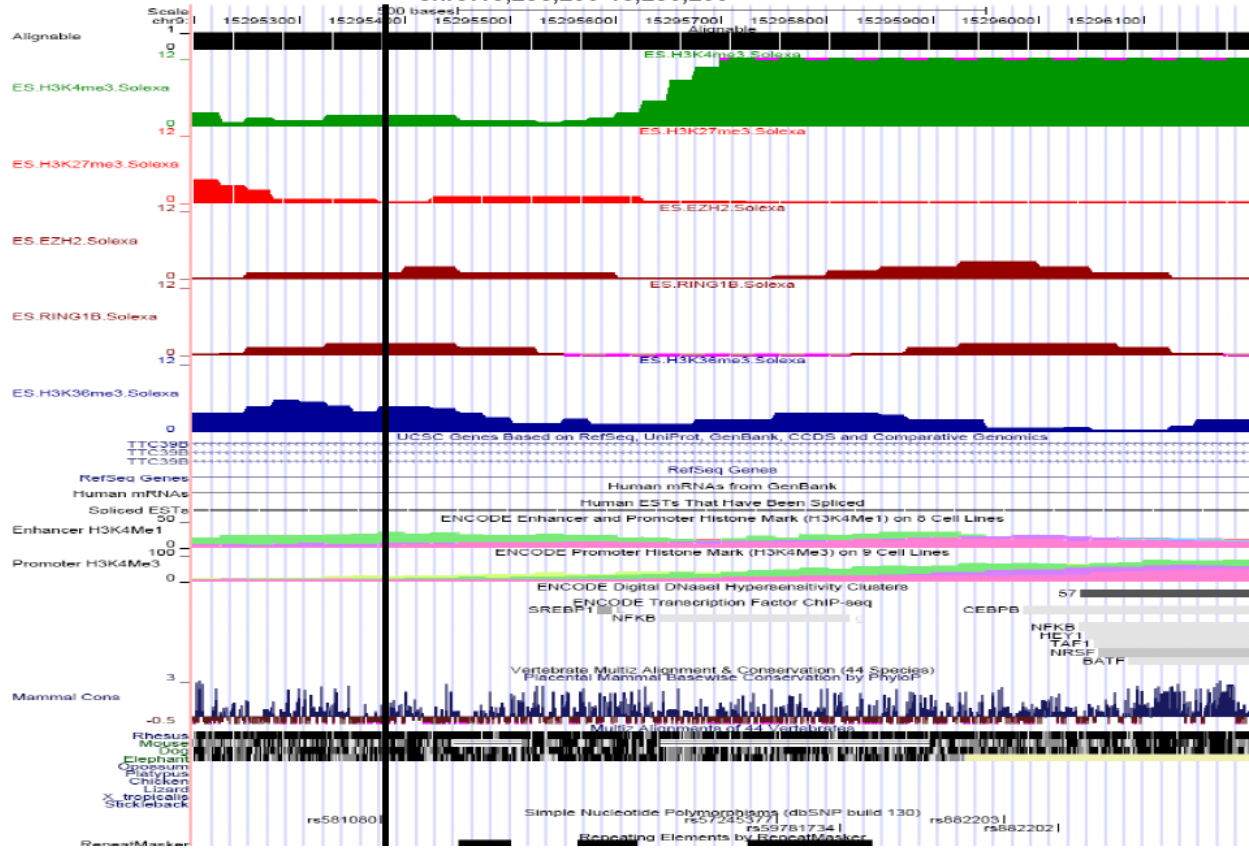

TG rs439401  
 size 501 bp.  
 chr19:50,106,000-50,106,500

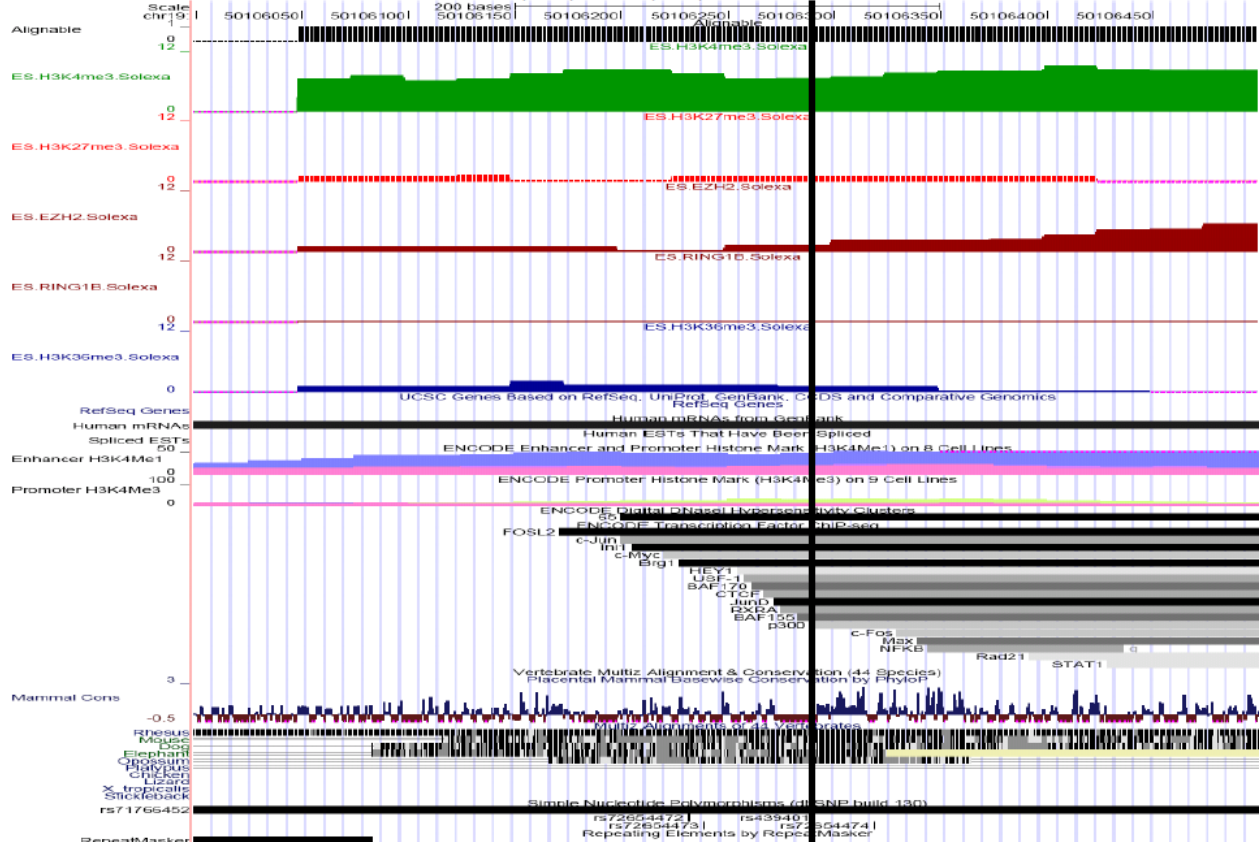

LDL/TC/HDL rs4420638  
 size 501 bp  
 chr19:50,114,500-50,115,000

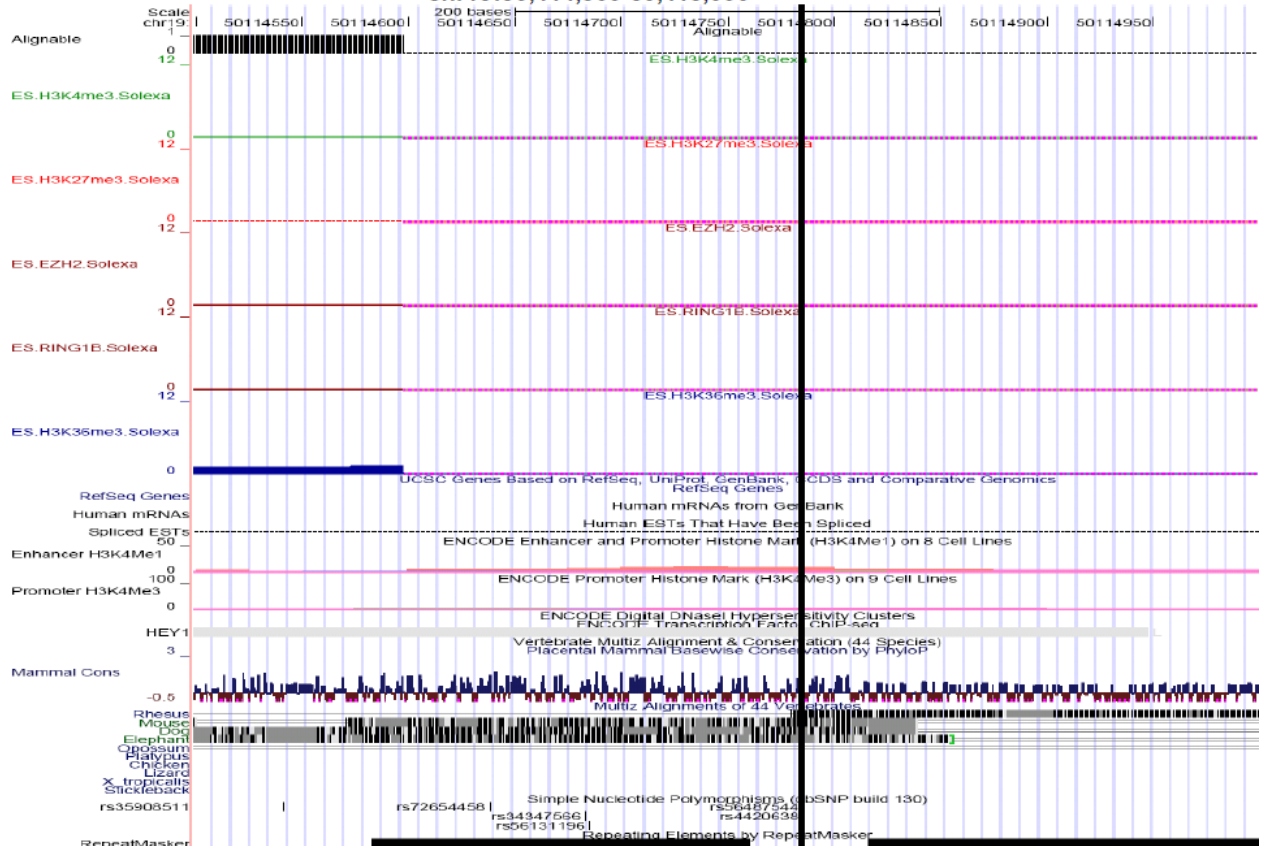

LDL/TC rs651720 LDLR  
 size 1,501 bp.  
 chr19:11,062,500-11,064,000

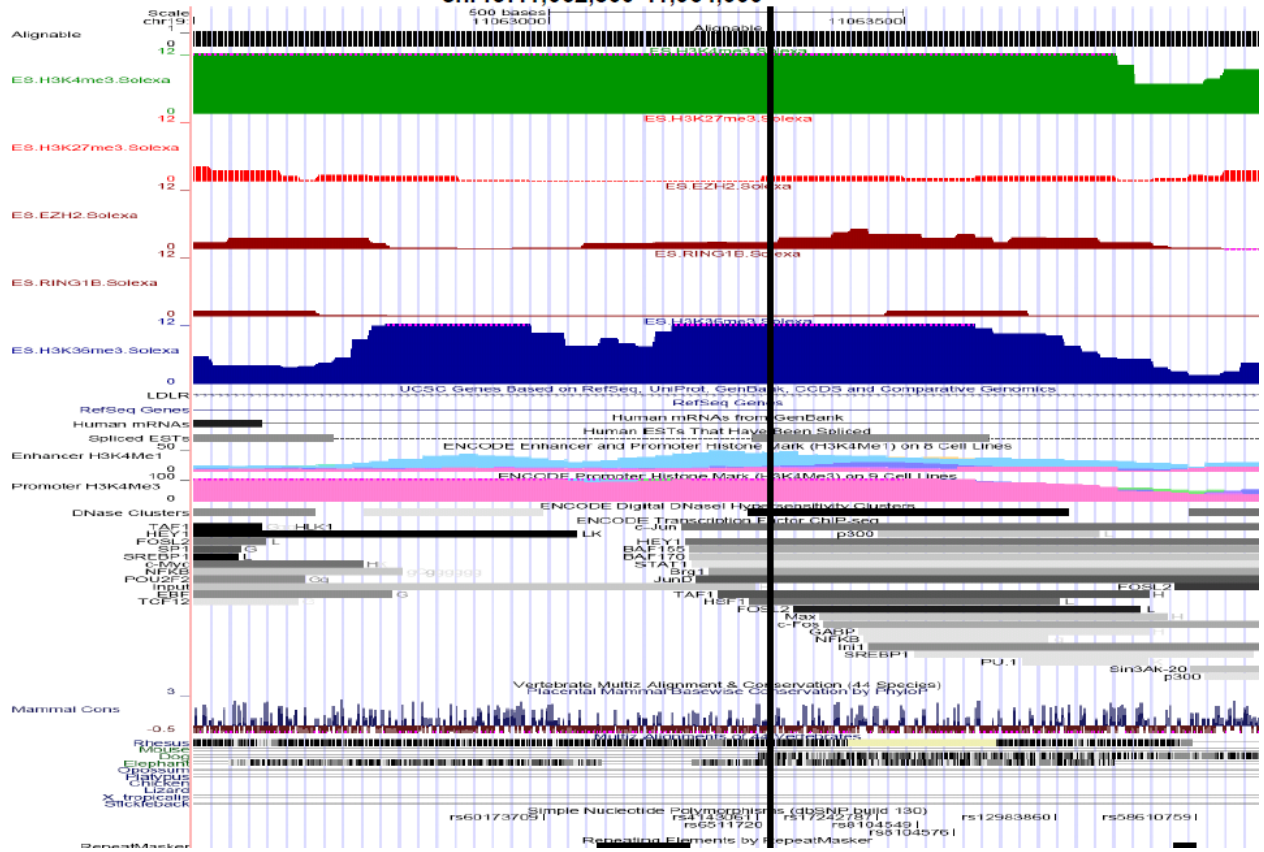

TG/HDL rs1042034  
 size 1,501 bp.  
 chr2:21,078,000-21,079,500

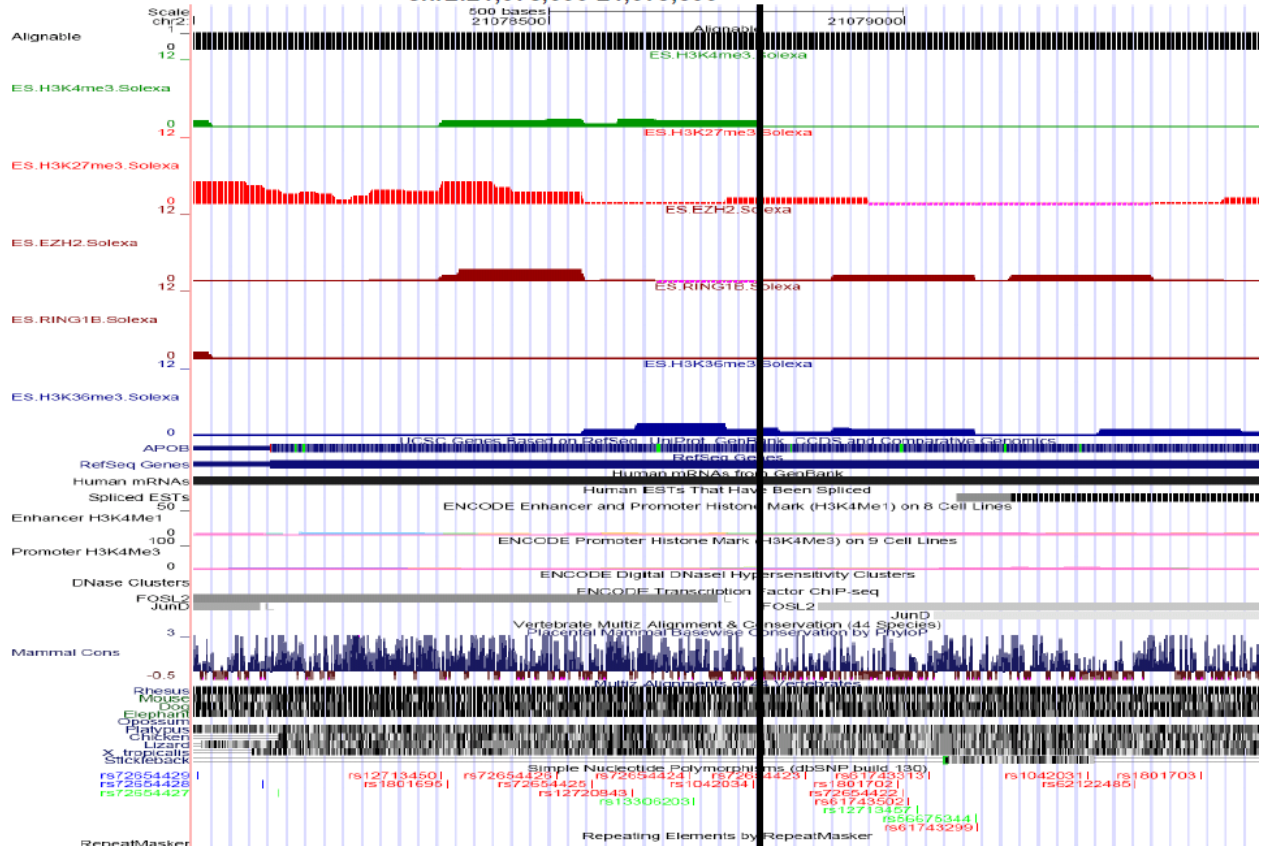

rs2383206 CAD  
size 502 bp.  
chr9:22,104,900-22,105,400

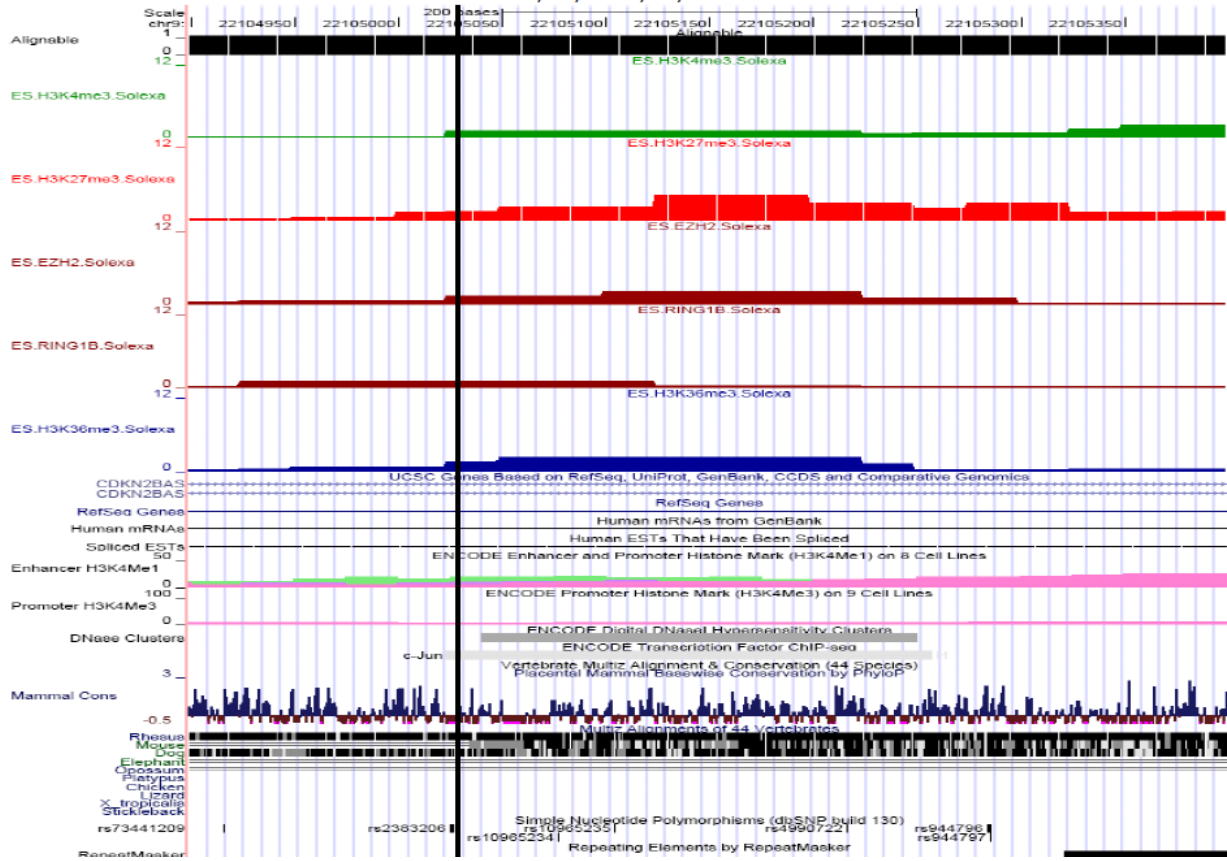

rs10757278 CAD  
 size 501 bp.  
 chr9:22,114,200-22,114,700

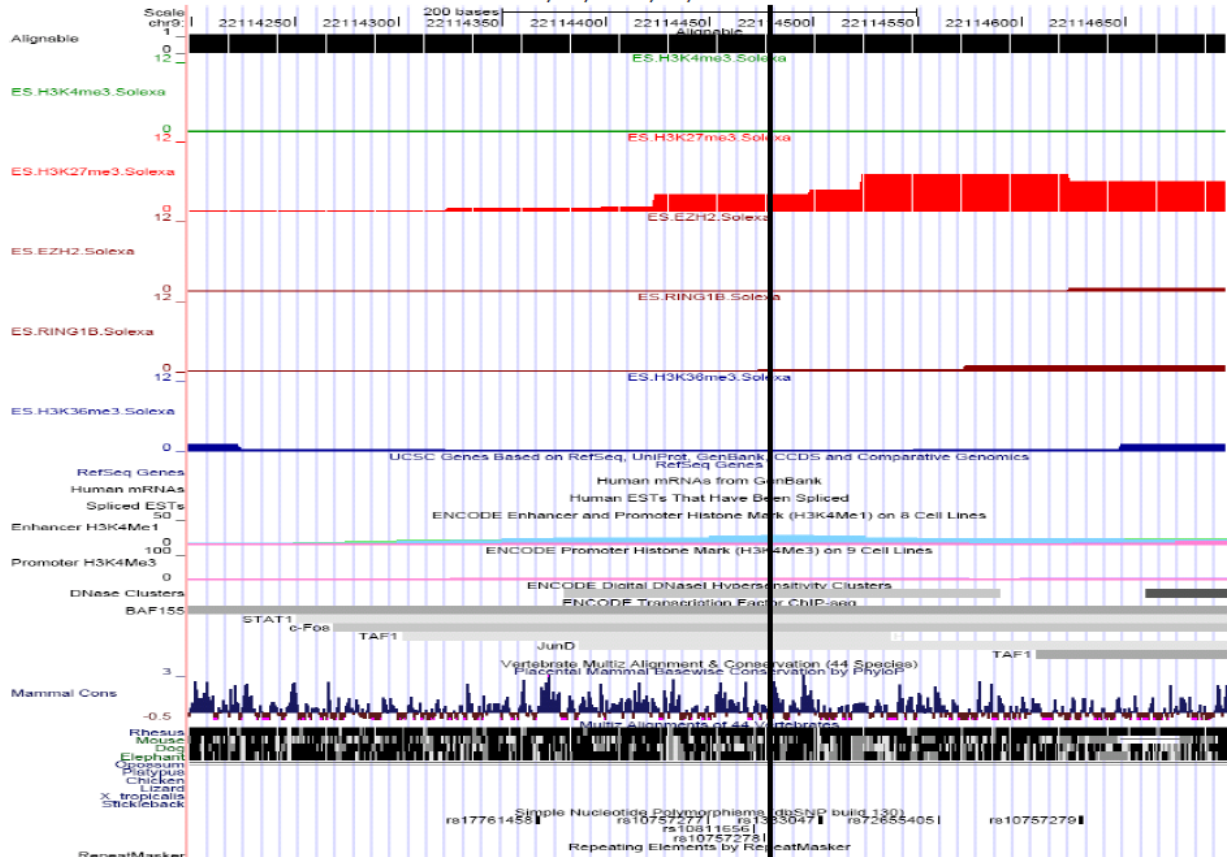



# Type 2 diabetes

rs7020996  
size 351 bp.  
chr9:22,119,375-22,119,725

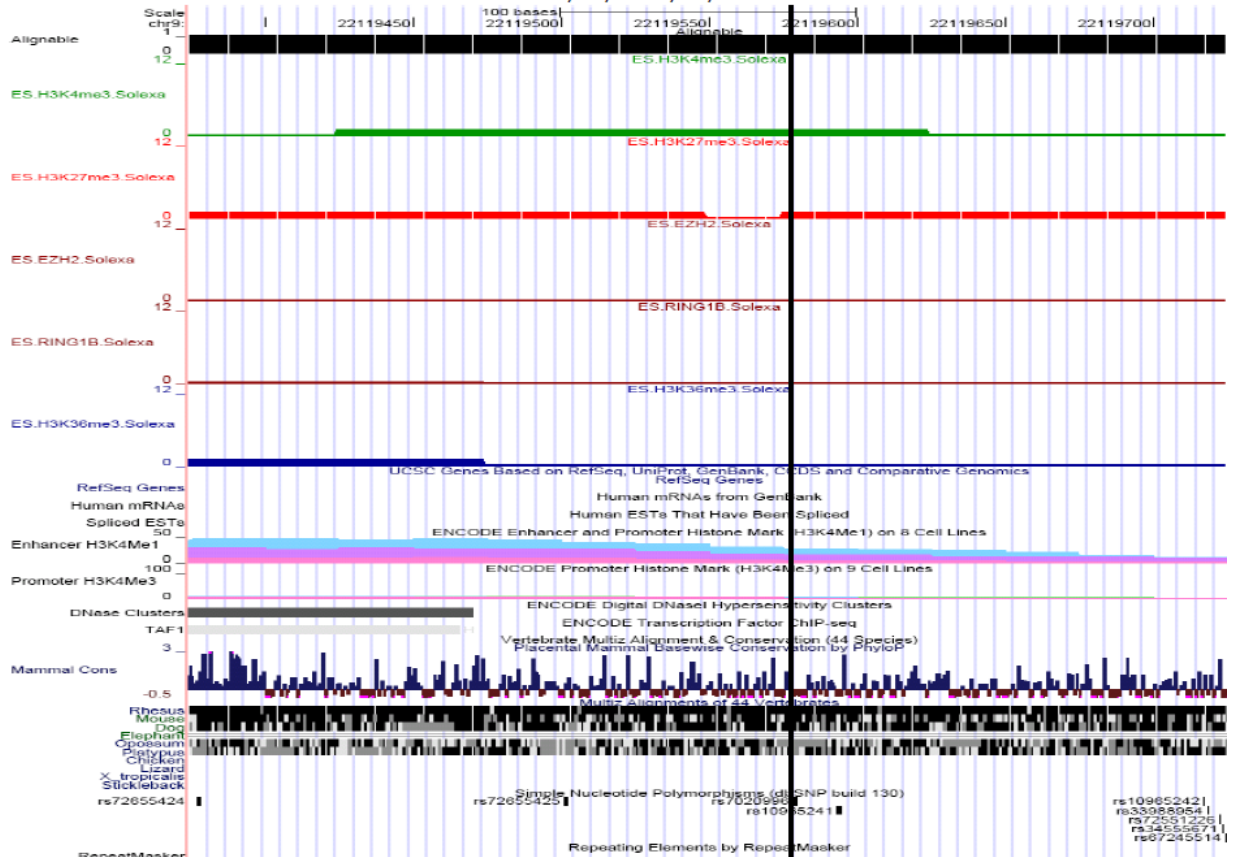

# Type 2 diabetes

rs17036101  
size 1,501 bp.  
chr3:12,251,900-12,253,400

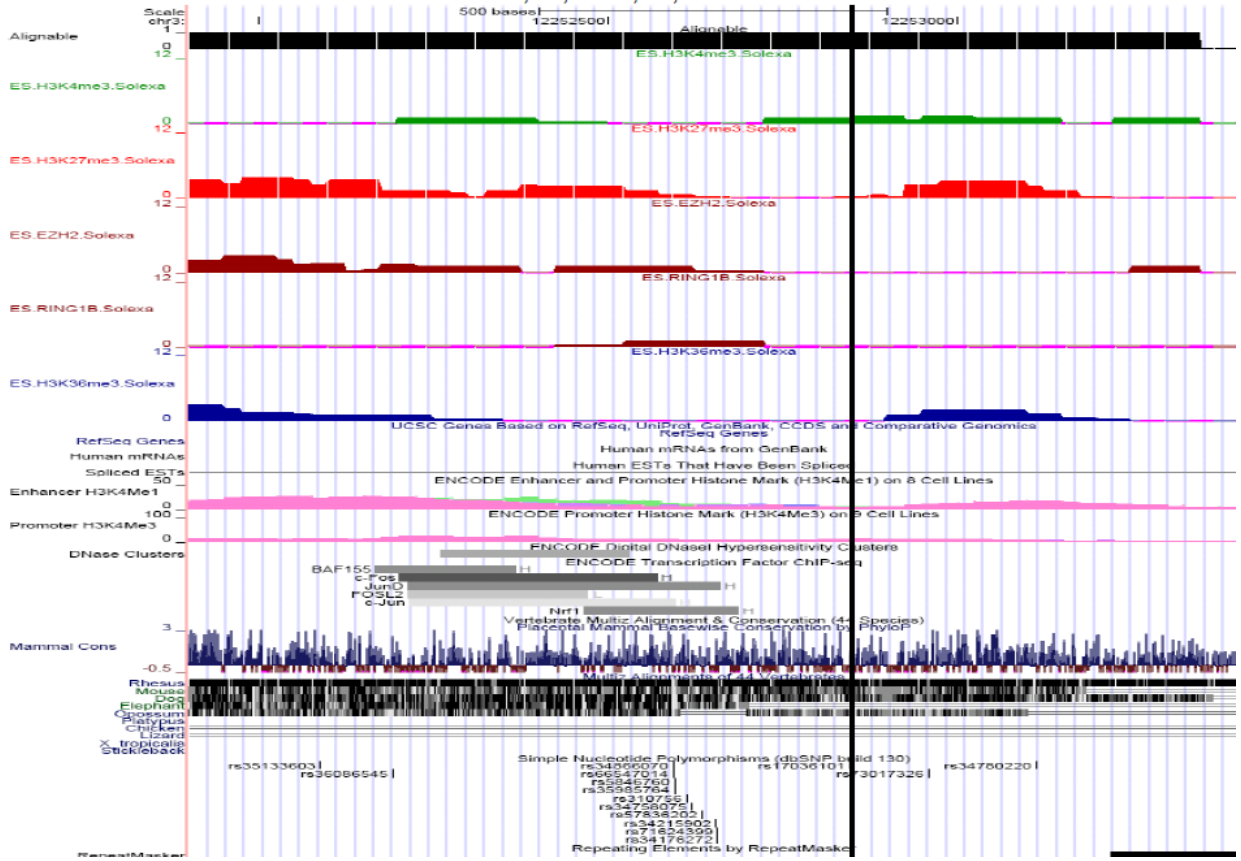

# Type 2 diabetes

rs17705177  
size 1,651 bp.  
chr17:33,197,250-33,198,900

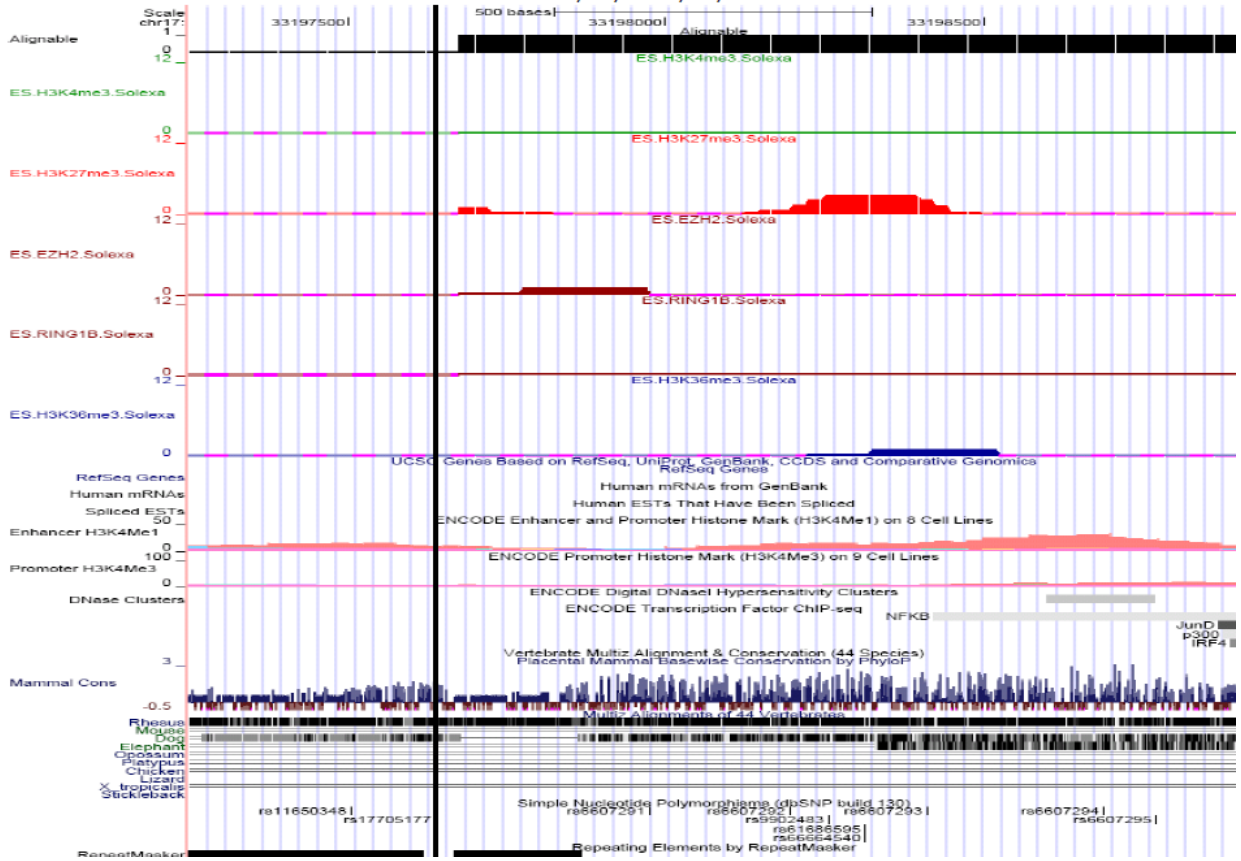

# Type 1 Diabetes

# Type 1 Diabetes and Rheumatoid Arthritis

size 826 bp.

chr6:32,681,925-32,682,750

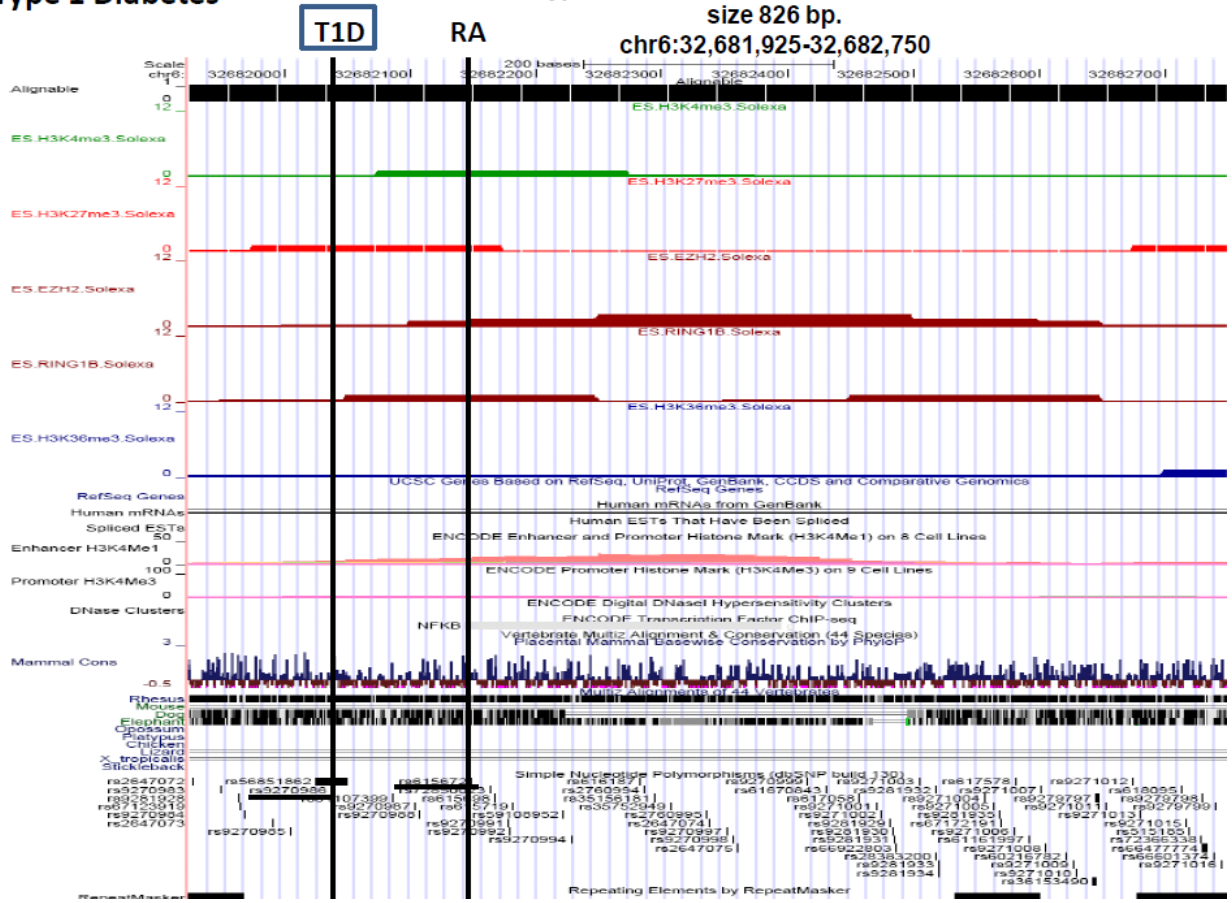

# Type 1 Diabetes

rs2544677  
size 501 bp.  
chr5:86,434,900-86,435,400

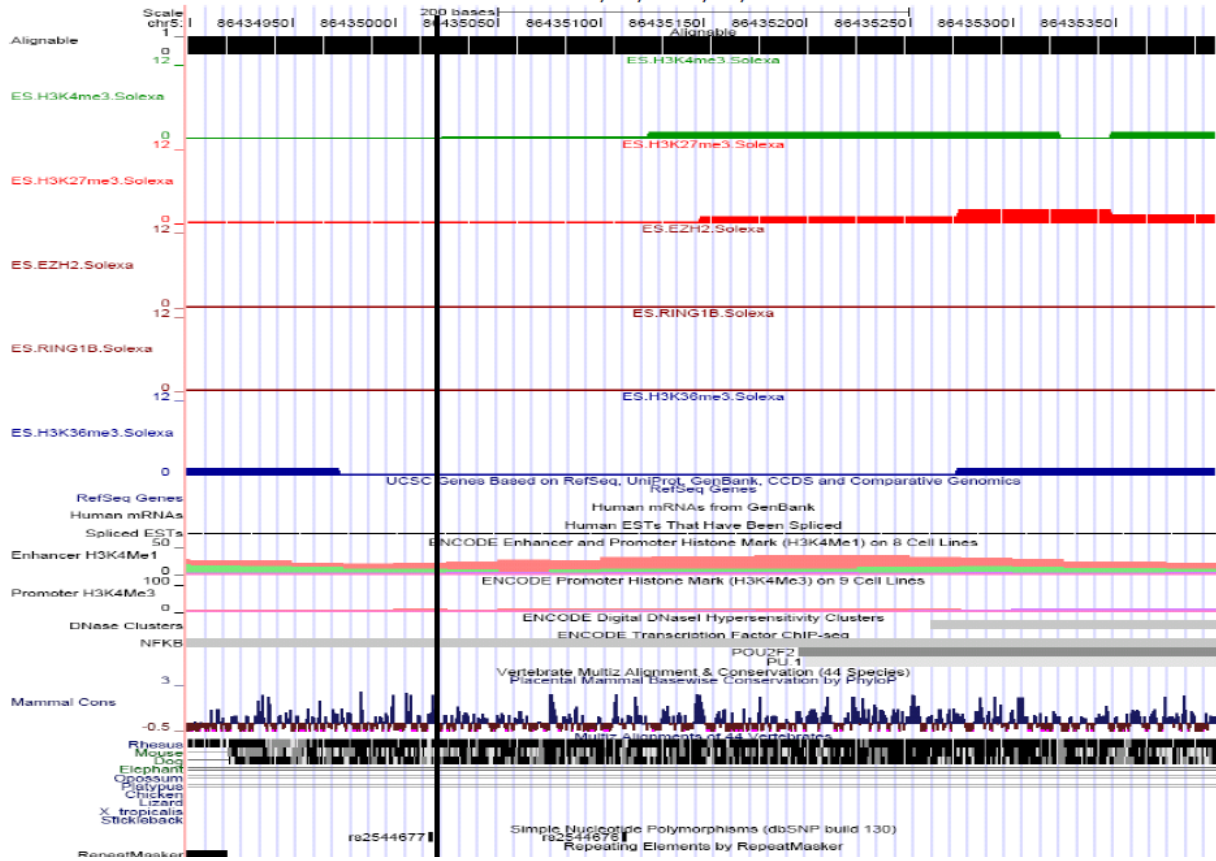

RA and T1D rs6679677  
size 526 bp.  
chr1:114,104,875-114,105,400

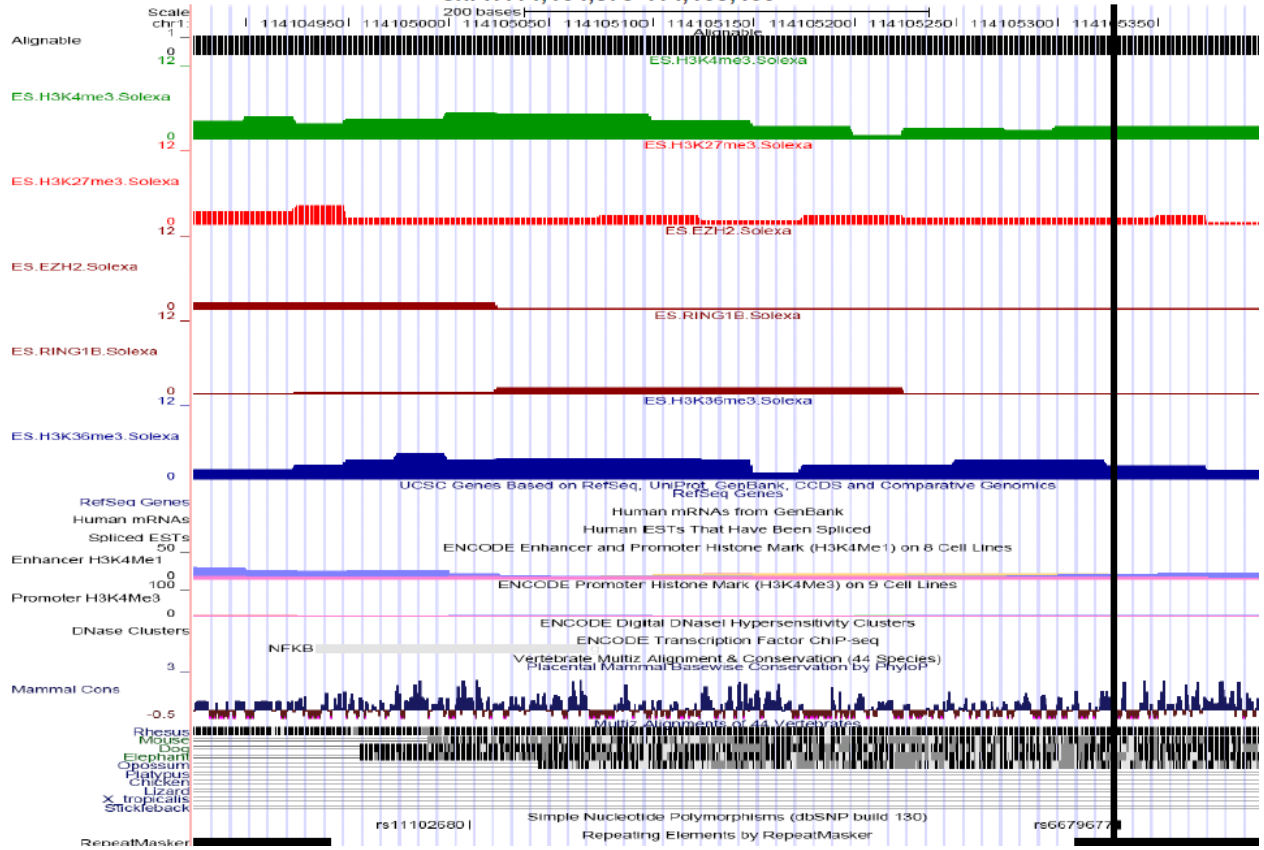









CD rs9469220  
size 401 bp.  
chr6:32,766,000-32,766,400

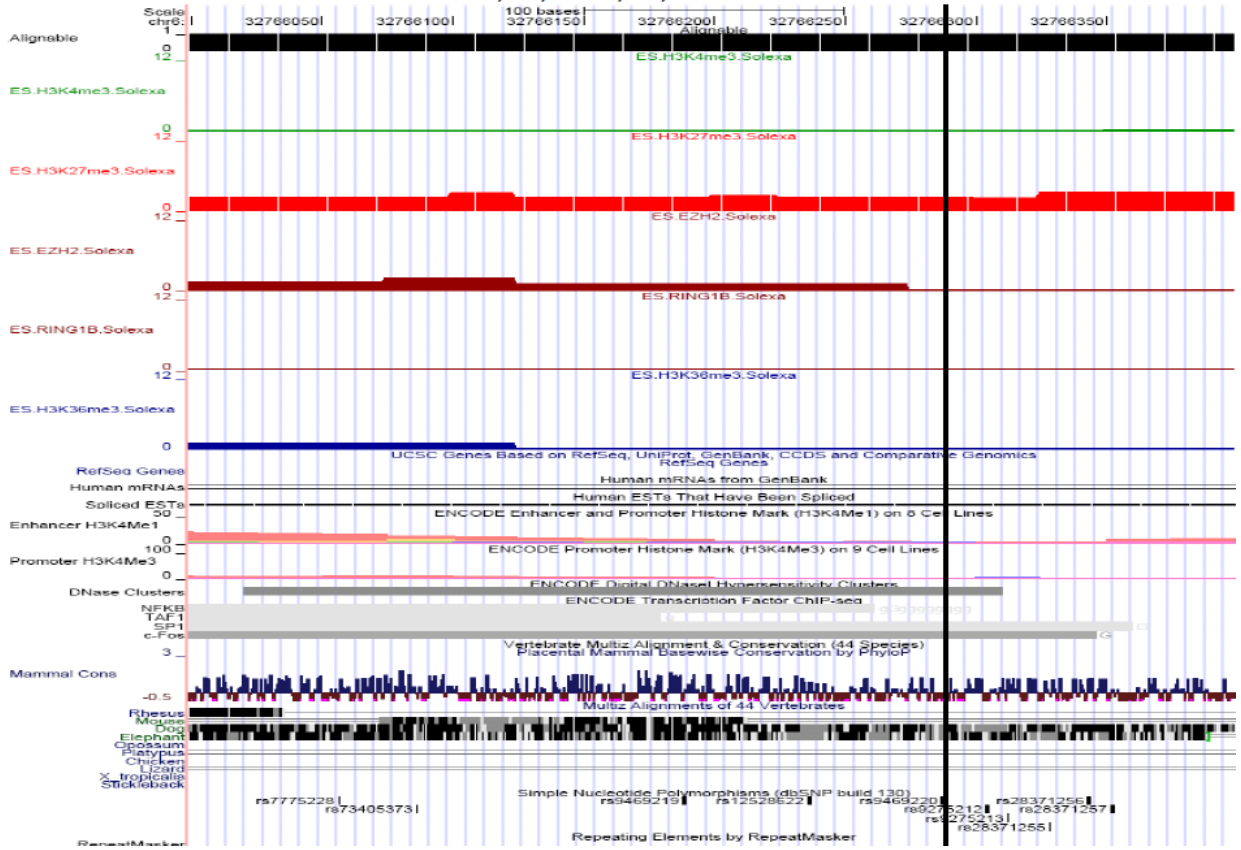

CD rs17234657  
size 401 bp.  
chr5:40,437,050-40,437,450

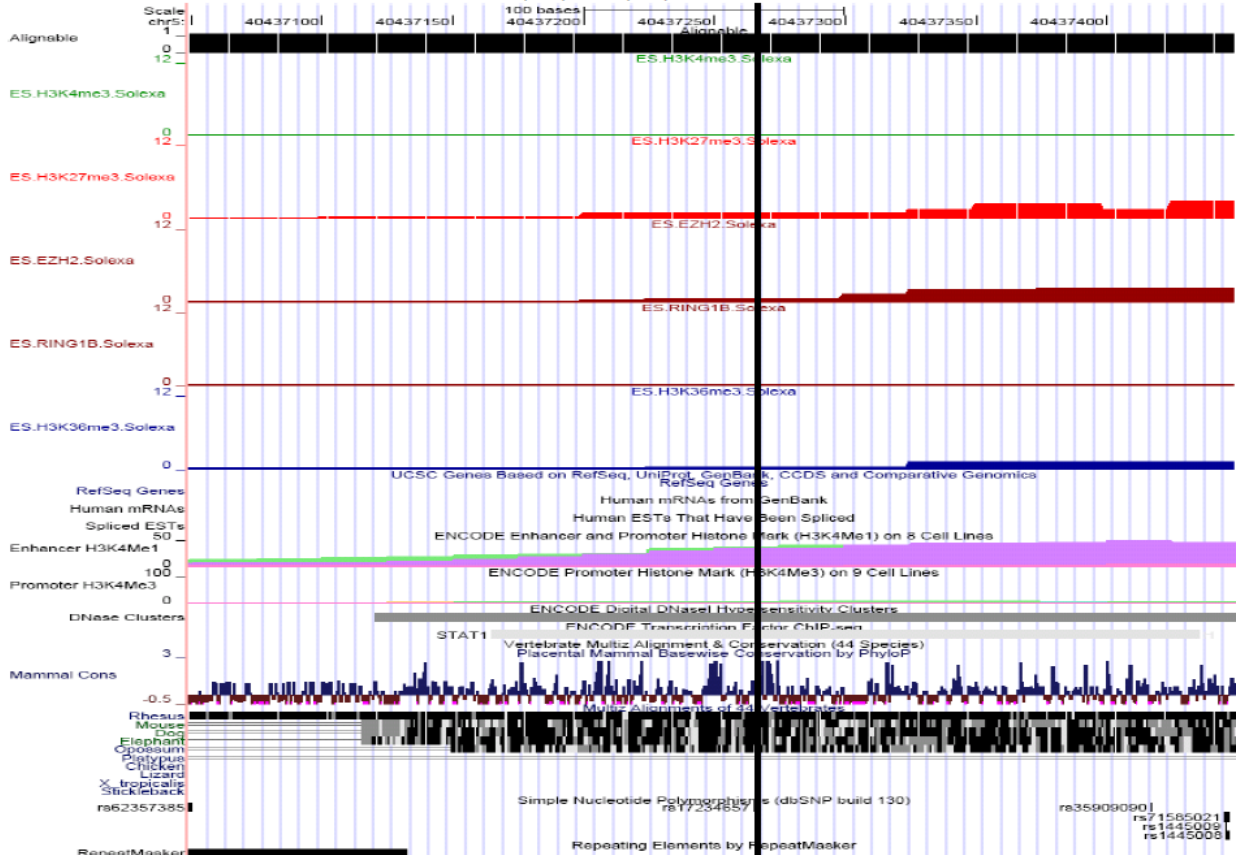

CD rs6672995

size 251 bp.

chr1:245,687,500-245,687,750

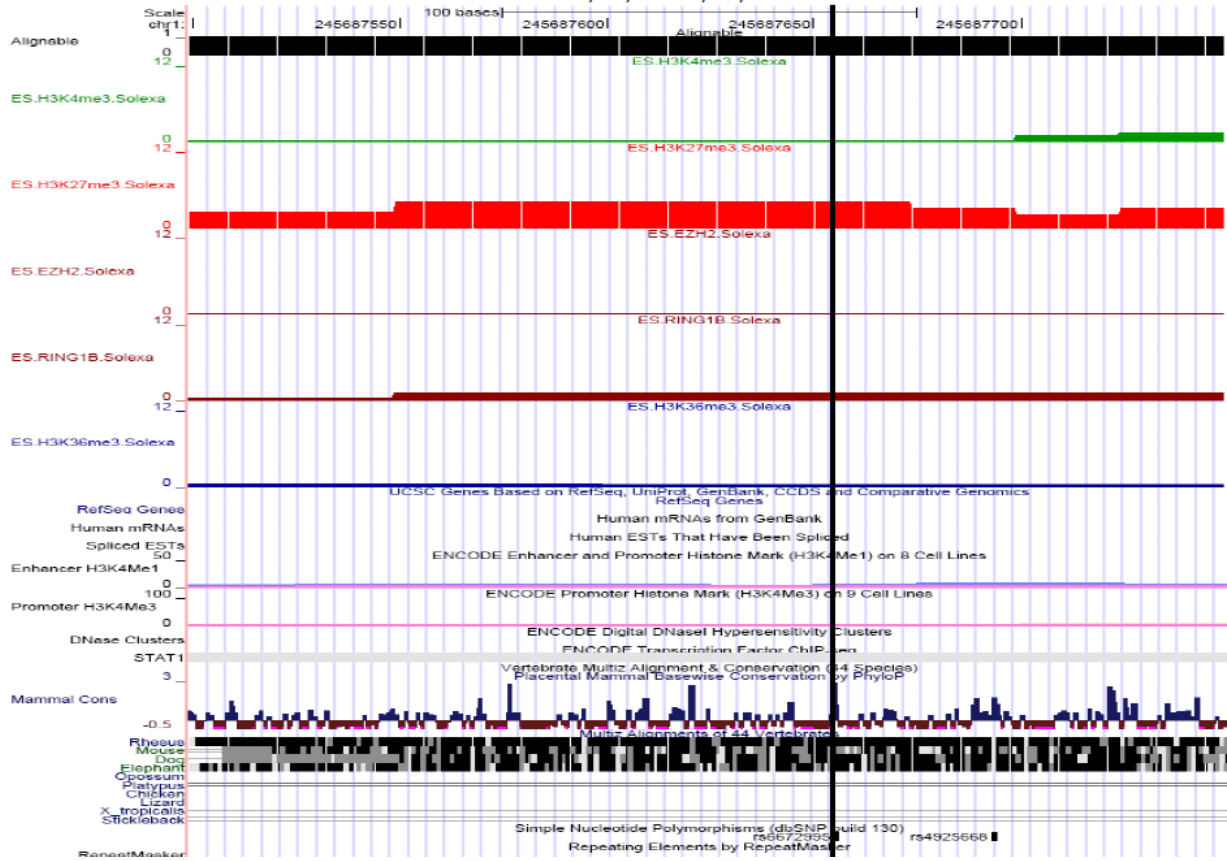

CD rs12037606  
size 501 bp.

chr1:171,164,750-171,165,250

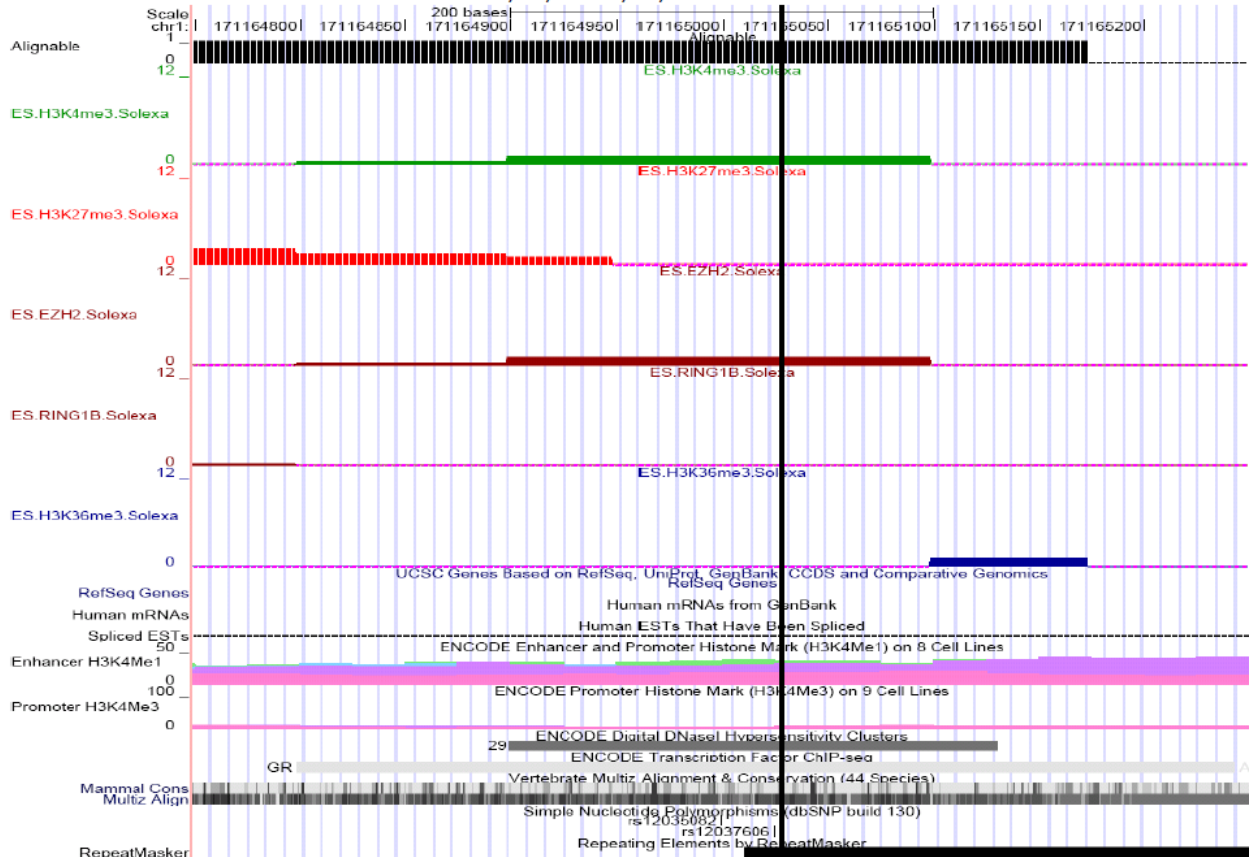

CD rs1992660  
size 1,501 bp.  
chr5:40,449,500-40,451,000

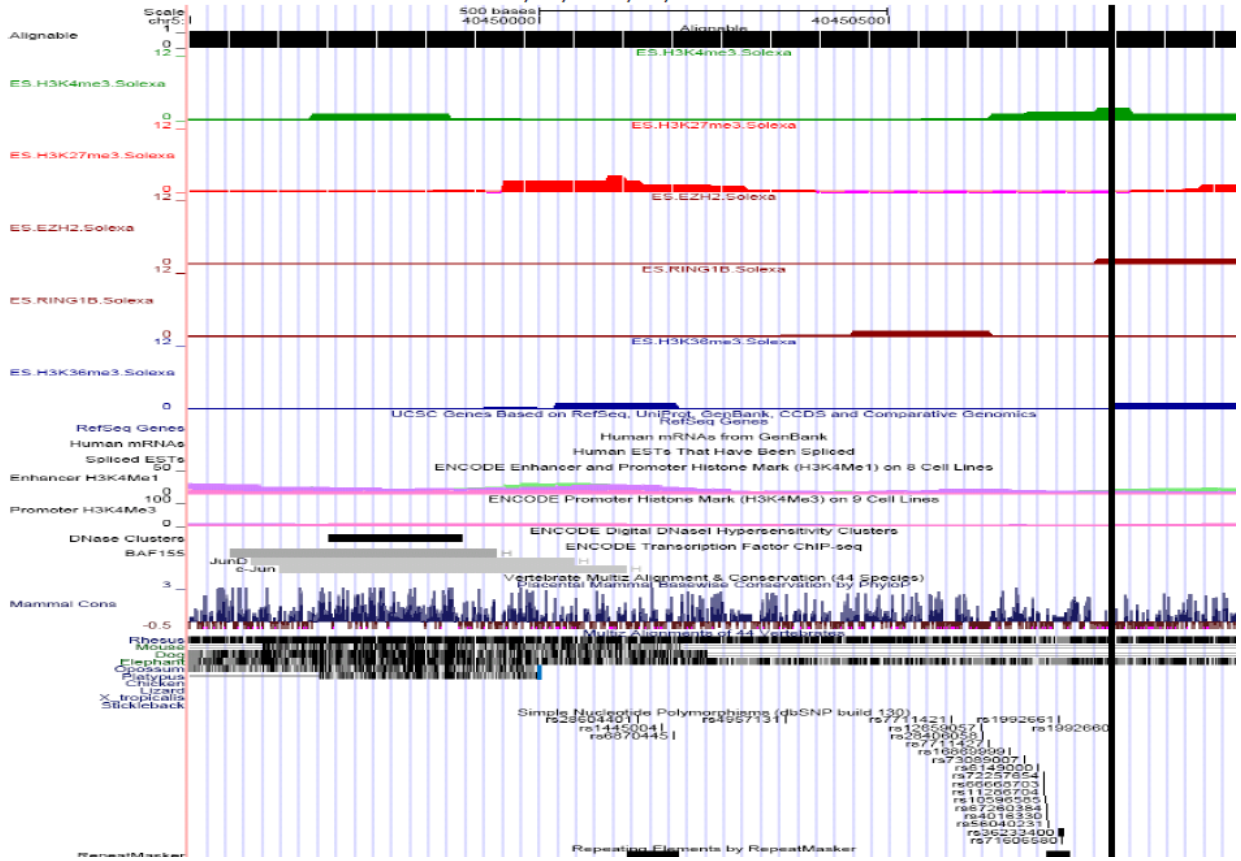

Human Genome Build 36.3  
A11: rs6983267 (chr8:128,482,487)  
A10: rs10808556 (chr8:128,482,329)

size 676 bp.  
chr8:128,482,150-128,482,825

UCSC Genome Browser on Human Mar.  
2006 (NCBI36/hg18) Assembly

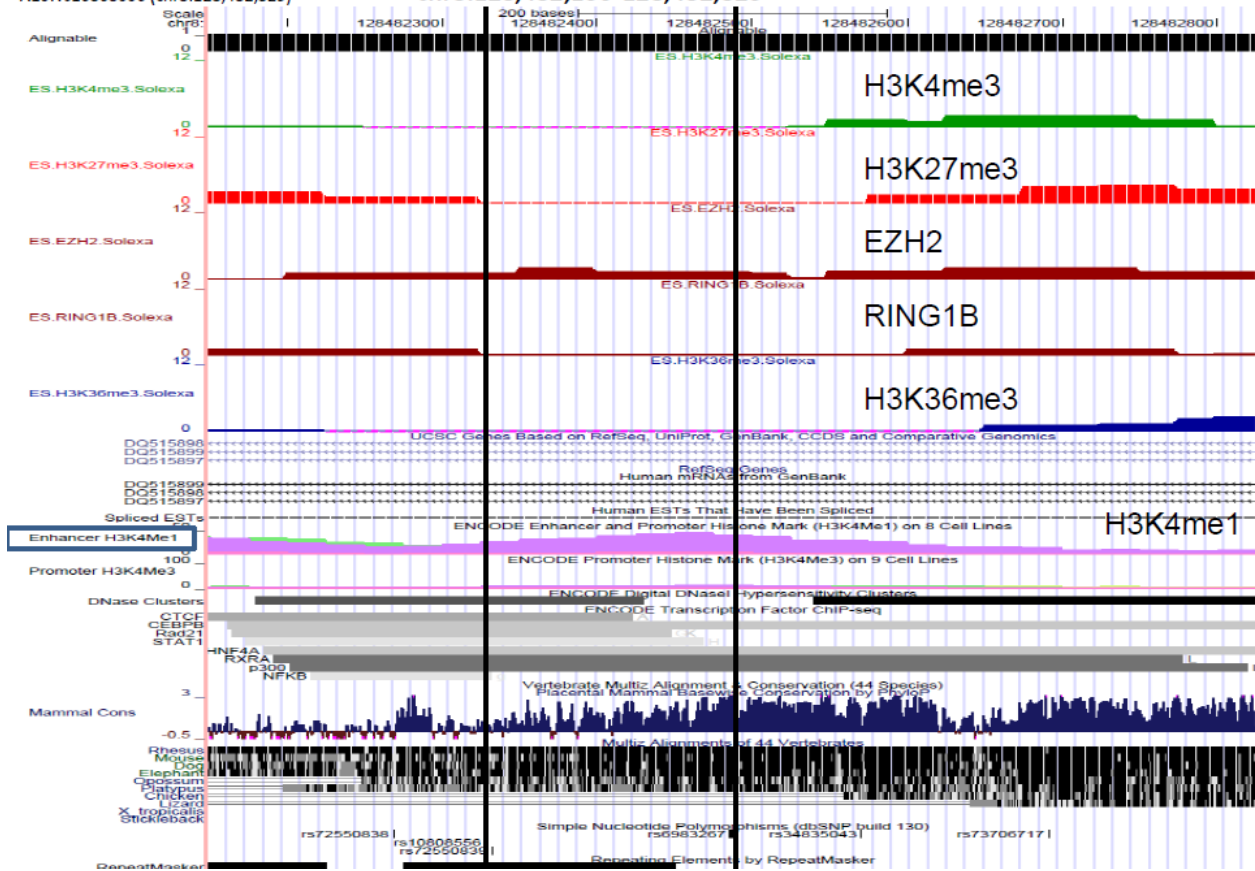

NALP1-locus transRNA  
 size 3,001 bp.  
 chr17:5,459,000-5,462,000

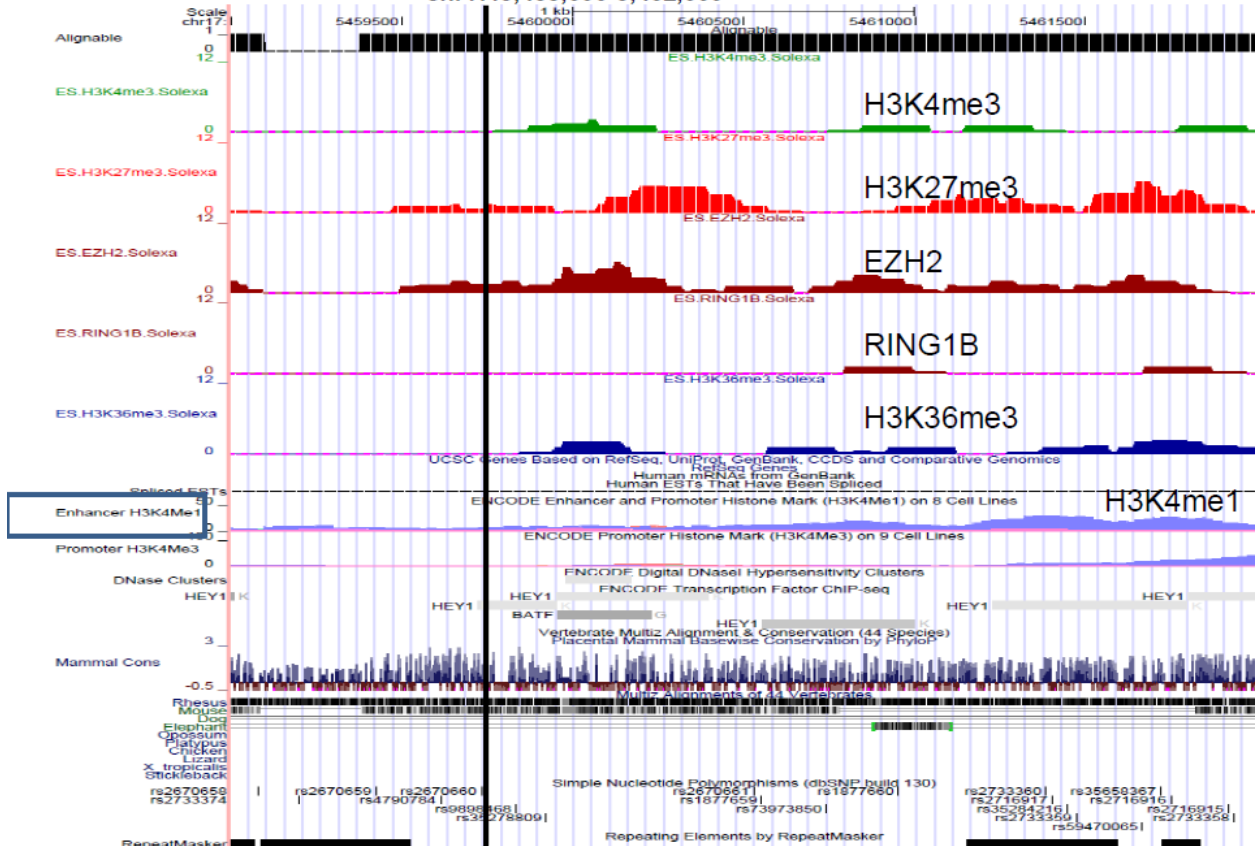



A16 transRNA Breast Cancer  
rs889312

rs889312  
size 901 bp.  
chr5:56,067,175-56,068,075

Human Embryonic Stem Cells

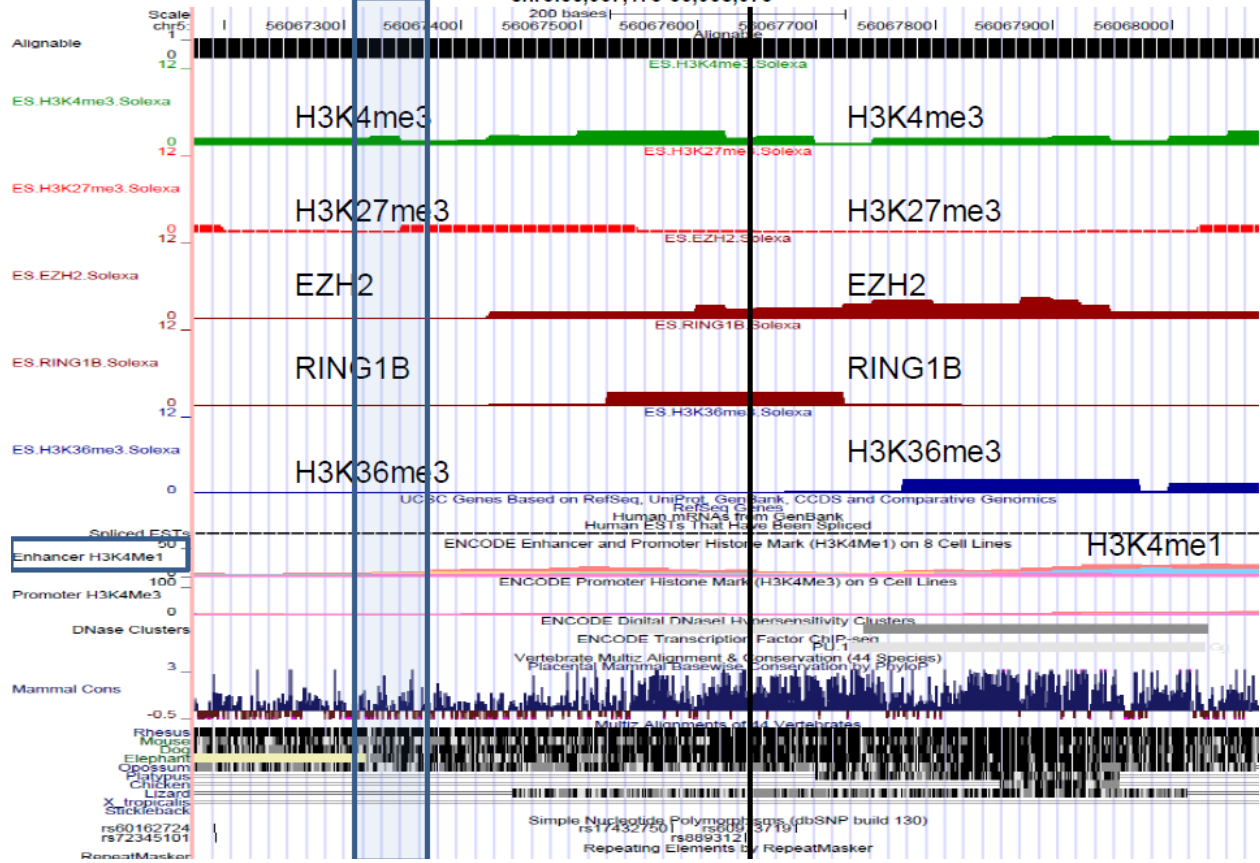

rs823128 Parkinson's Disease  
 size 526 bp.  
 chr1:203,979,725-203,980,250

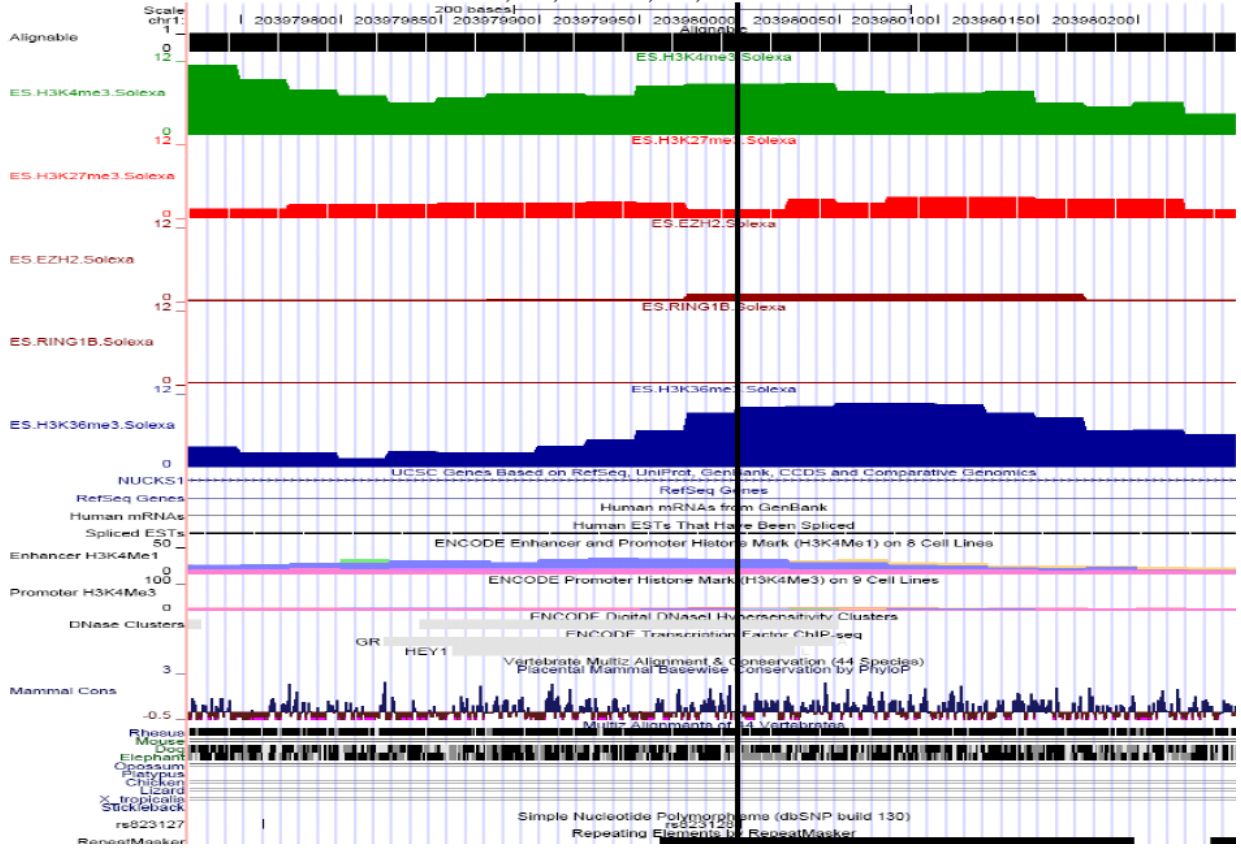

PD transRNA rs393152  
size 676 bp.  
chr17:41,074,575-41,075,250

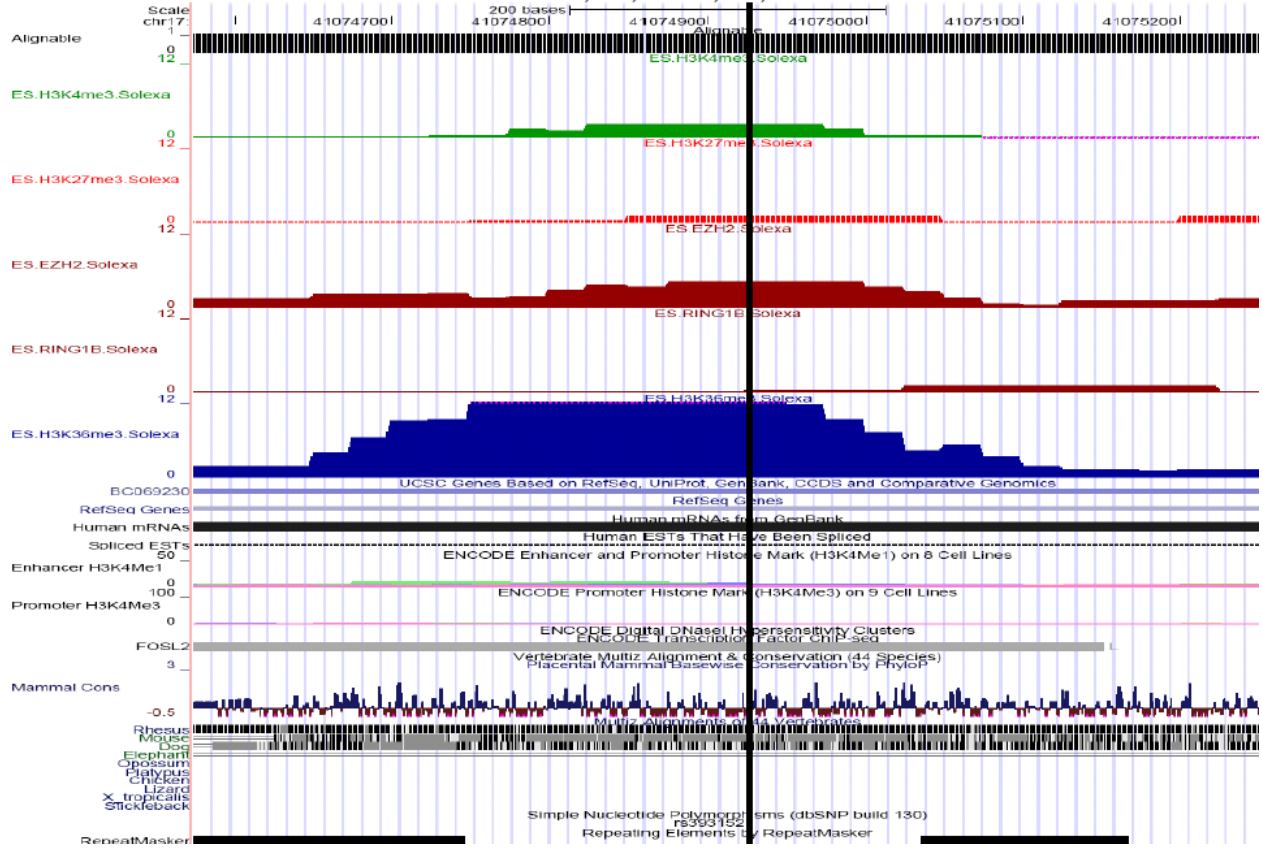

D26: rs12141187 SCHZ  
size 751 bp.  
chr1:145,449,150-145,449,900

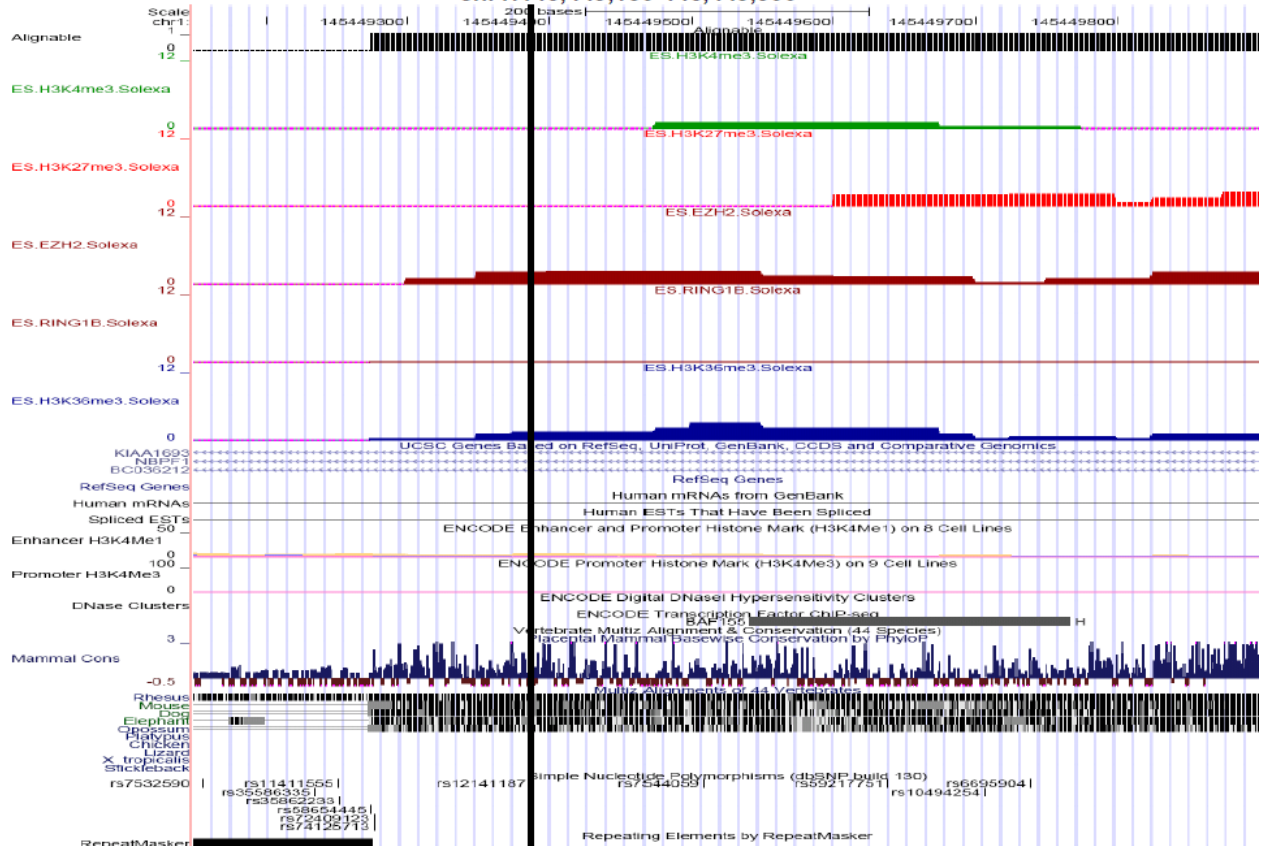

Longevity rs2075650  
 size 2,001 bp  
 chr19:50,086,600-50,088,600

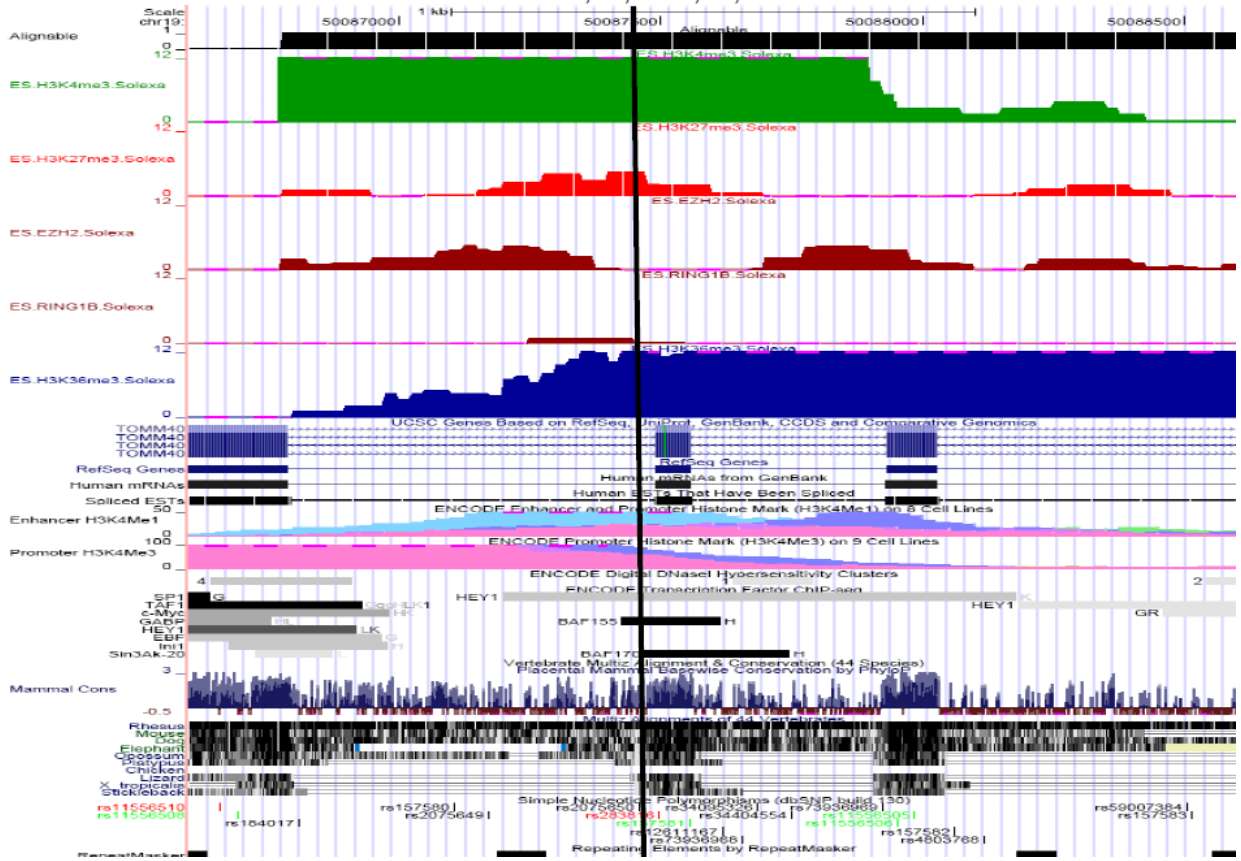

Longevity rs1810636  
size 526 bp.  
chr20:2,602,800-2,603,325

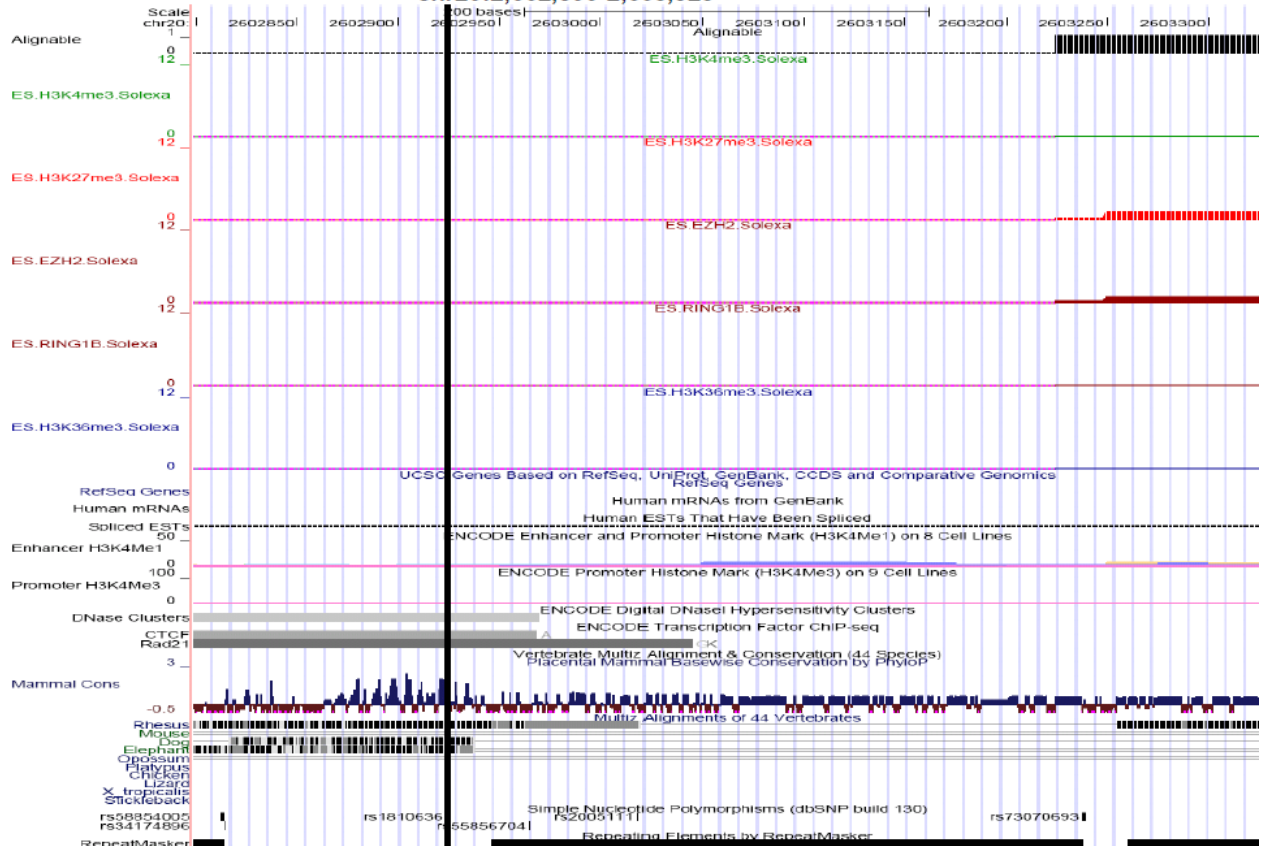

Longevity rs4713607  
 size 901 bp.  
 chr6:33,198,800-33,199,700

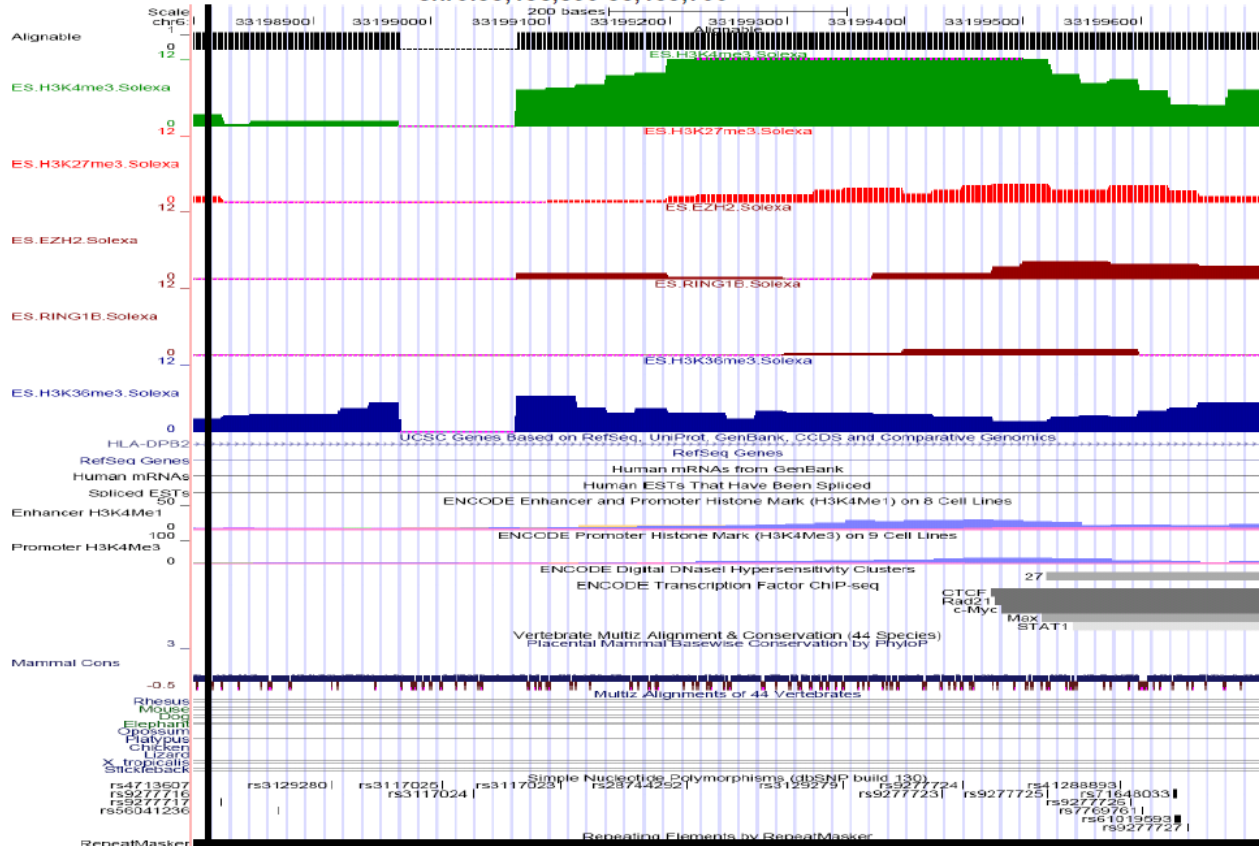

# Type 2 diabetes

rs9472138  
size 326 bp.  
chr6:43,919,550-43,919,875

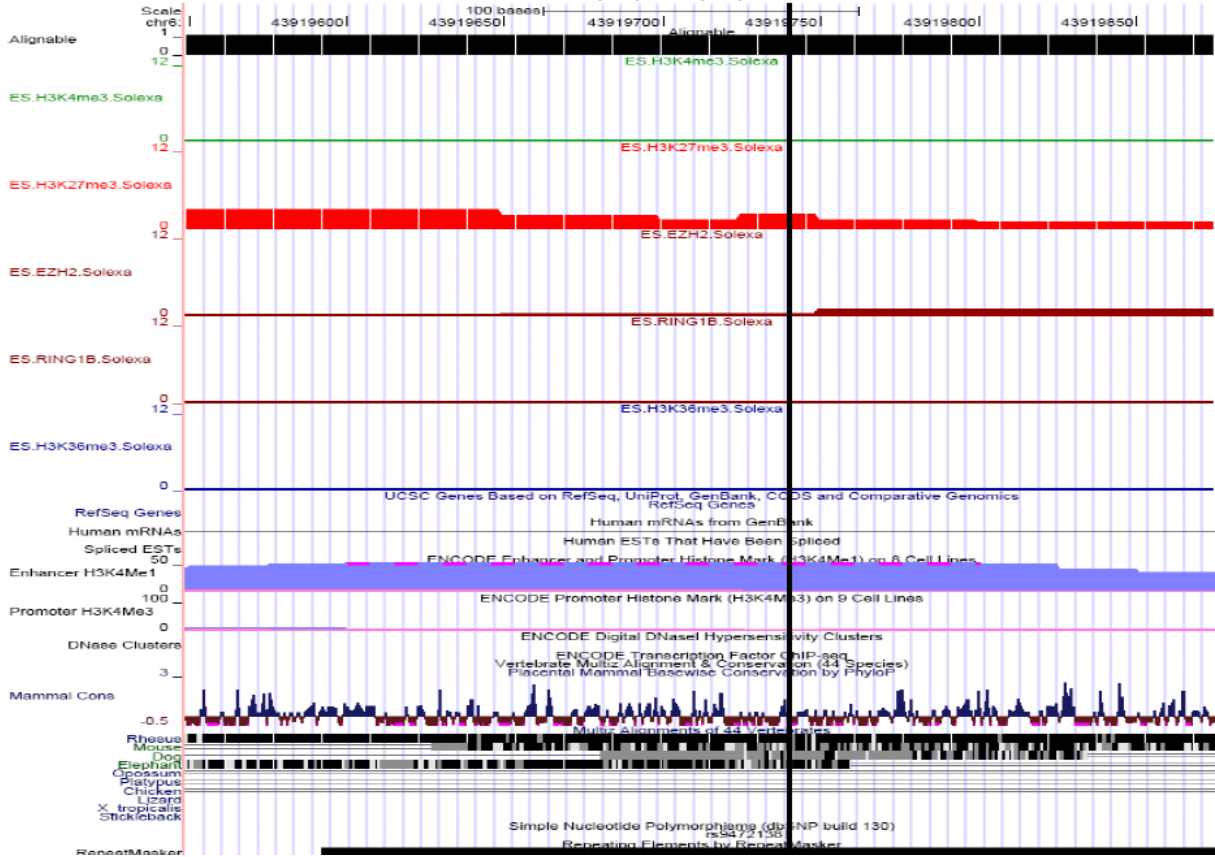



CD rs10883365

size 401 bp.

chr10:101,277,500-101,277,900

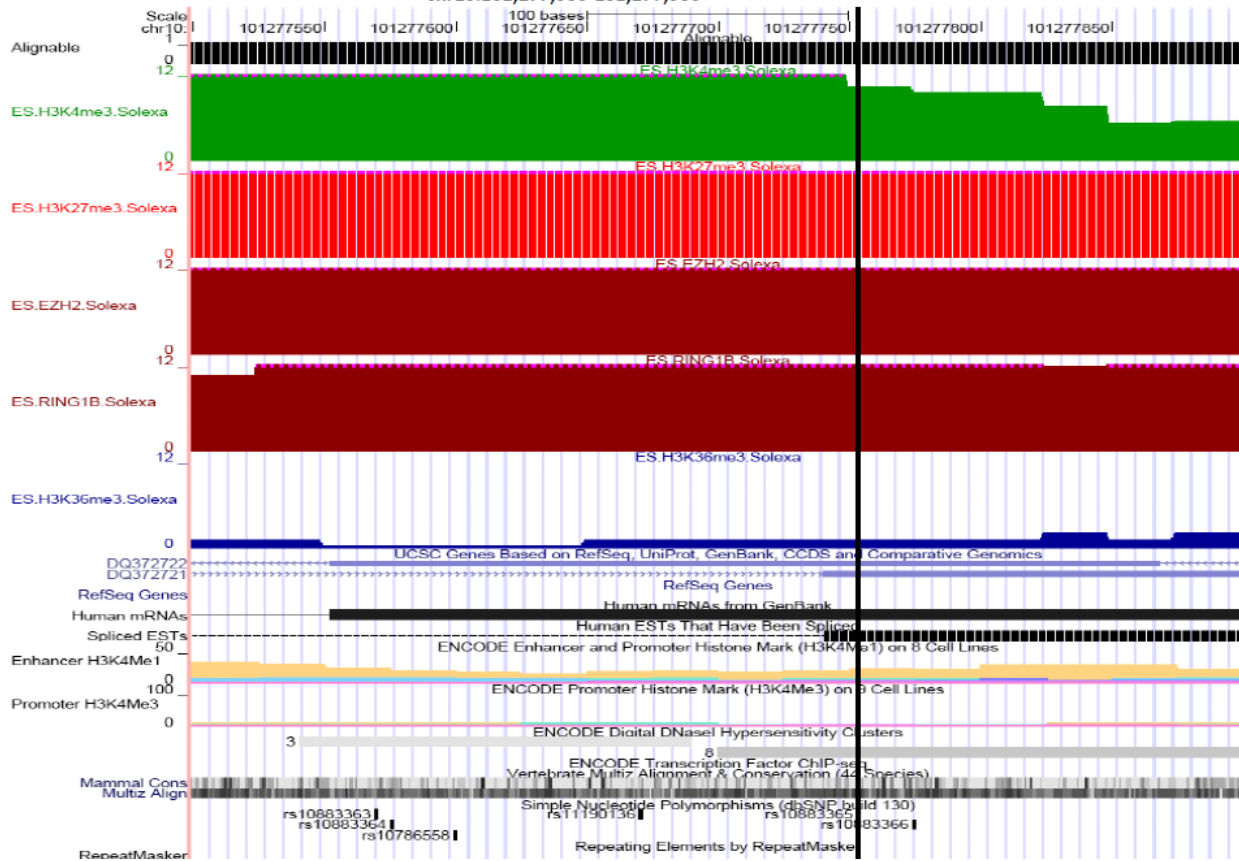

CD rs6601764  
 size 1,301 bp.  
 chr10:3,851,900-3,853,200

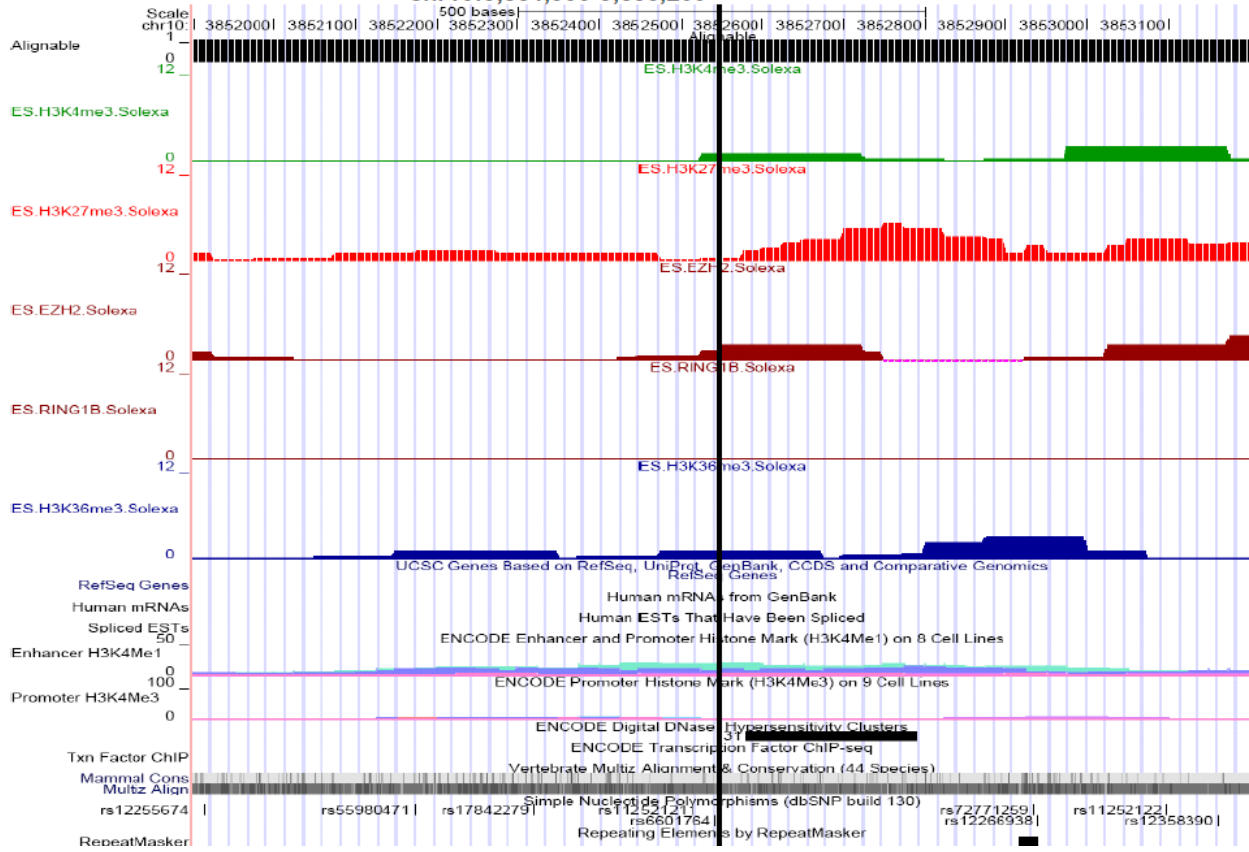

E3 rs3803662 Breast Cancer  
size 851 bp.  
chr16:51,143,400-51,144,250

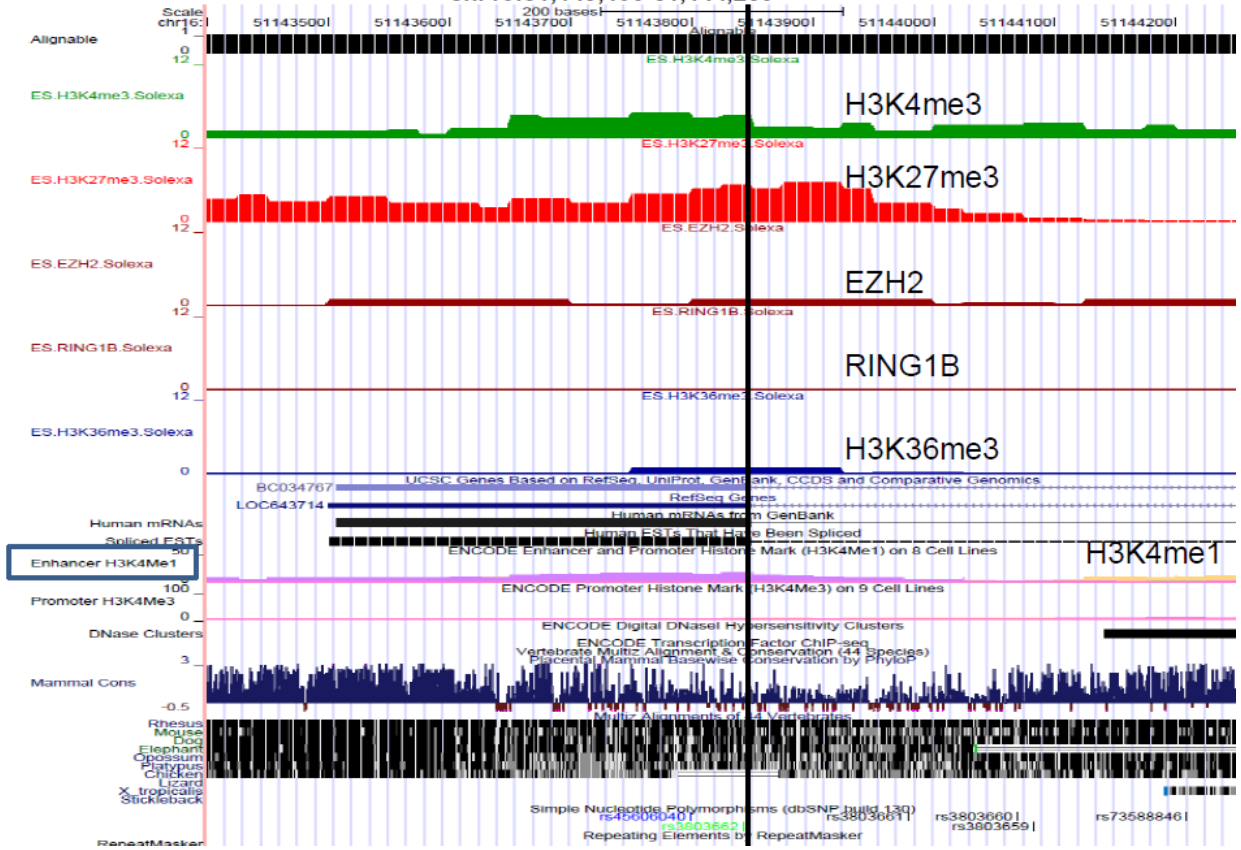

rs2981582 Breast Cancer Intronic FGFR2  
size 601 bp.

chr10:123,342,000-123,342,600

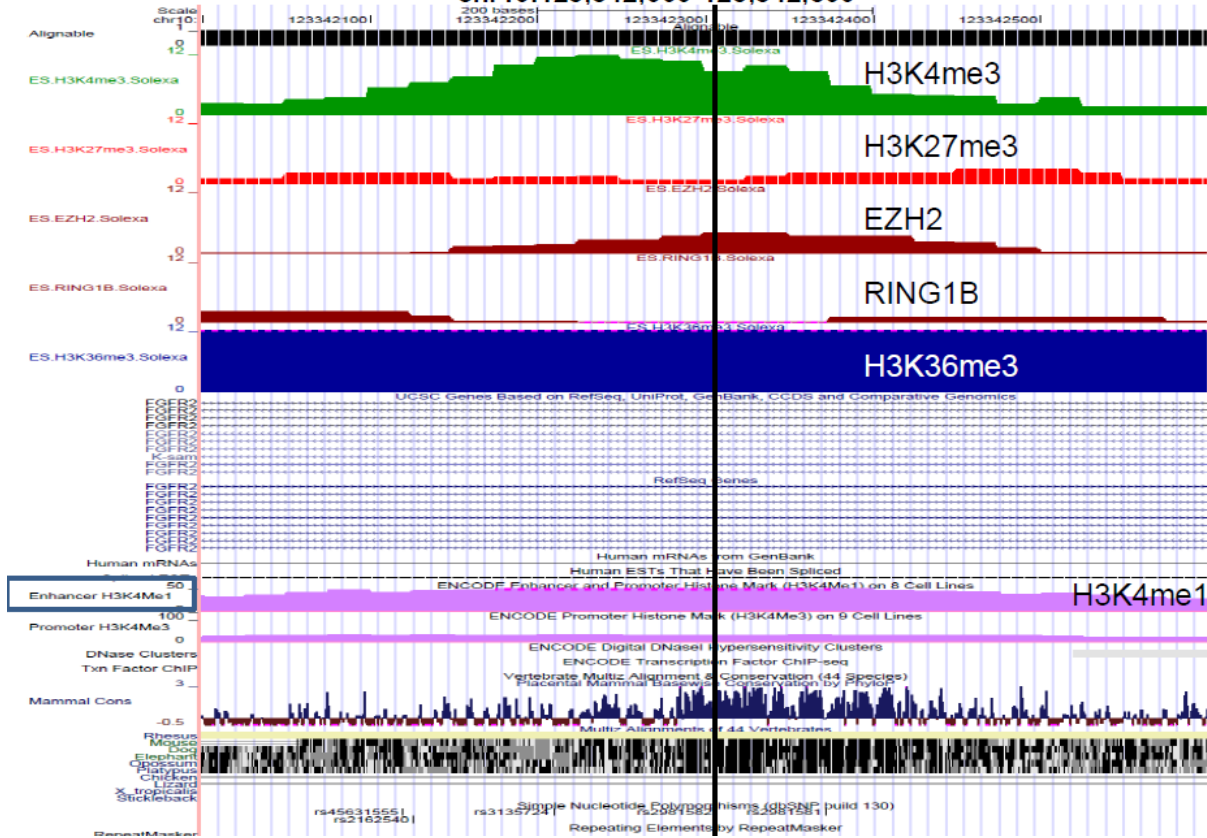

rs4636294 Melanoma  
size 526 bp.  
chr9:21,737,525-21,738,050

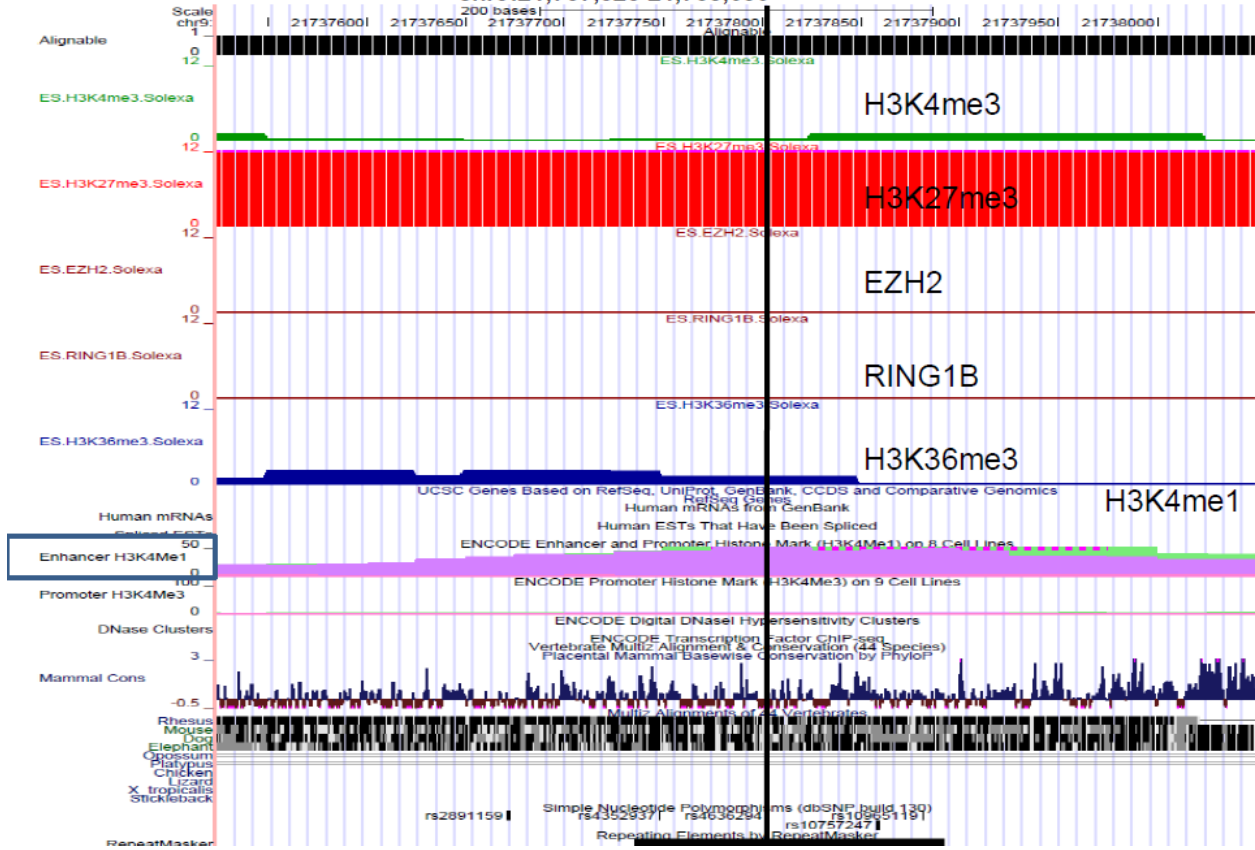

RA D22 rs2837960  
 size 601 bp.  
 chr21:41,433,200-41,433,800

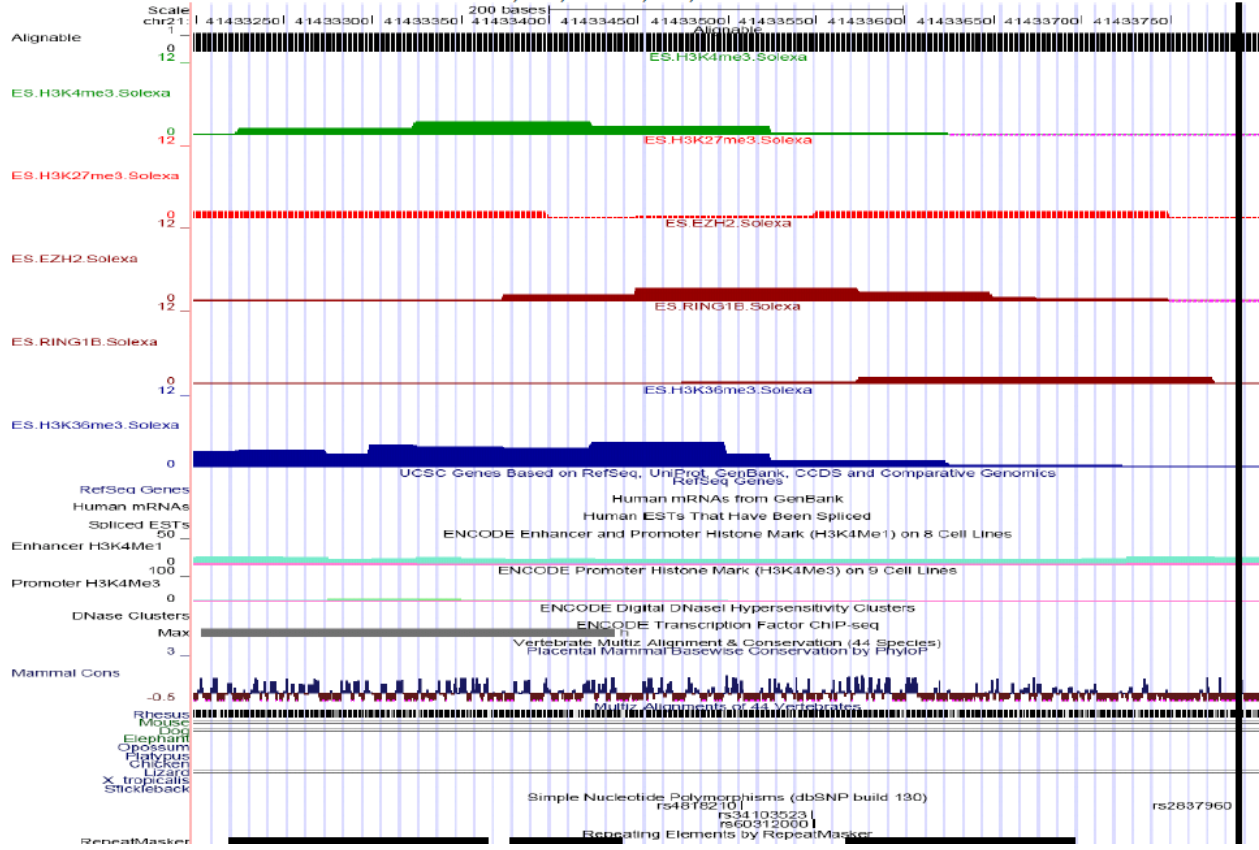

HT rs2736098  
size 1,451 bp.  
chr5:1,347,050-1,348,500

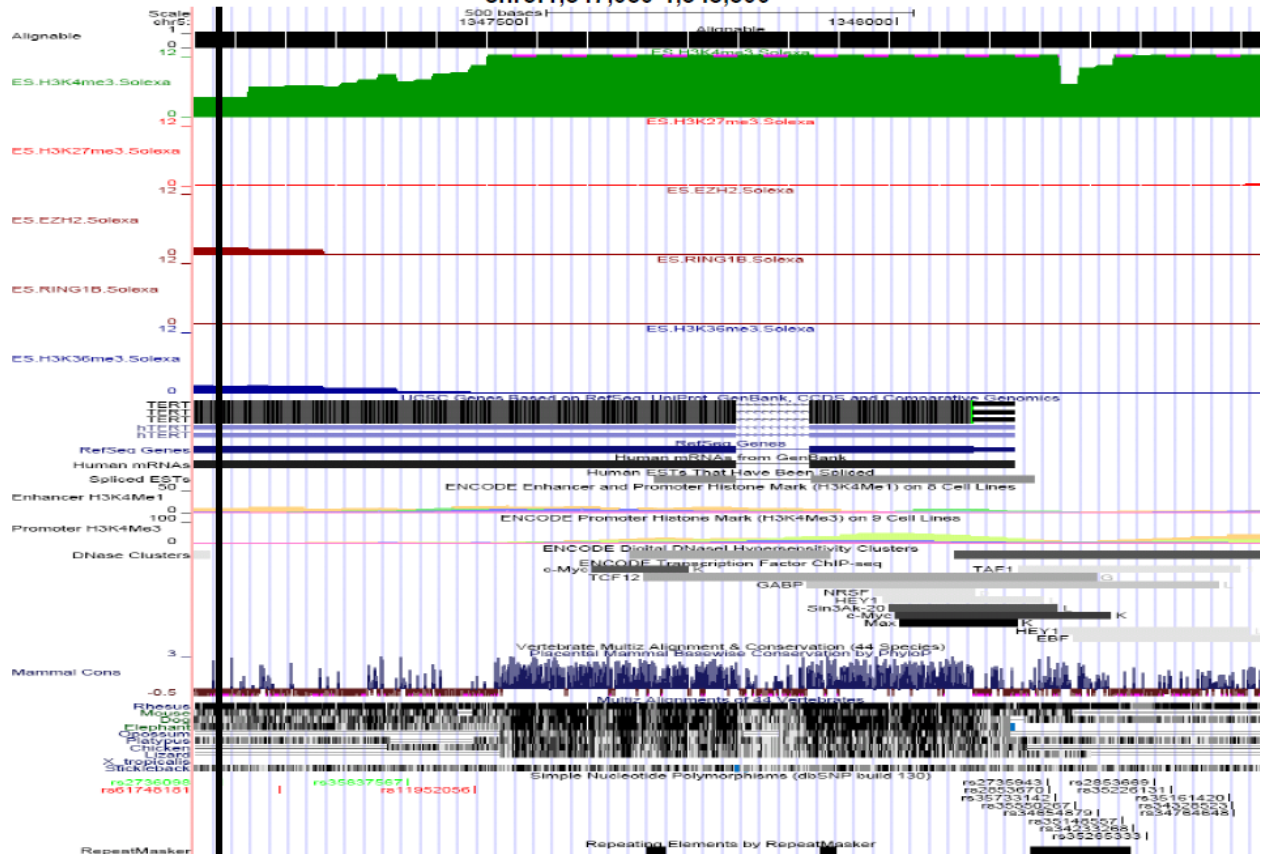





Figure S5.

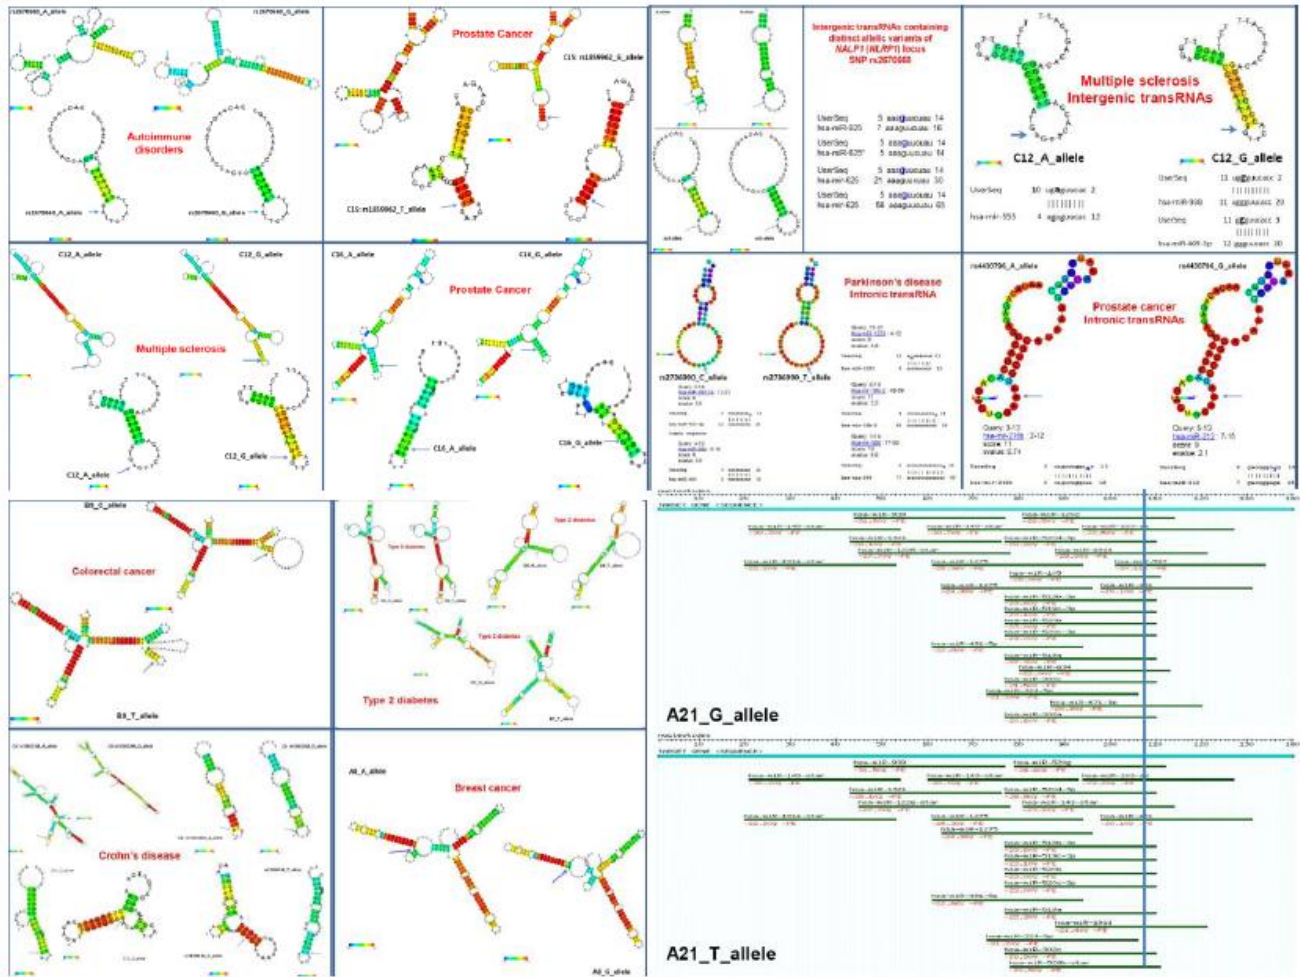

Figure S6.

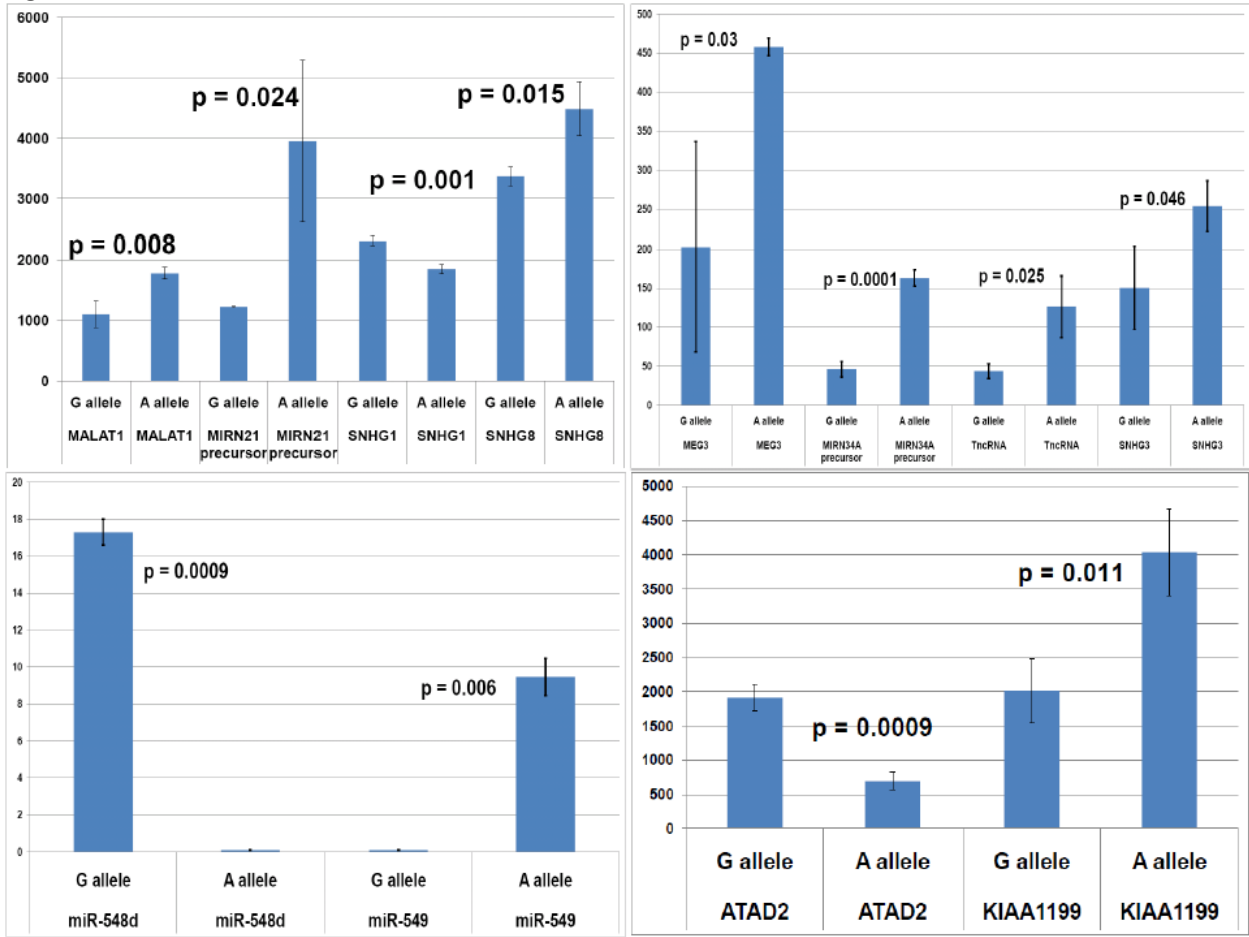

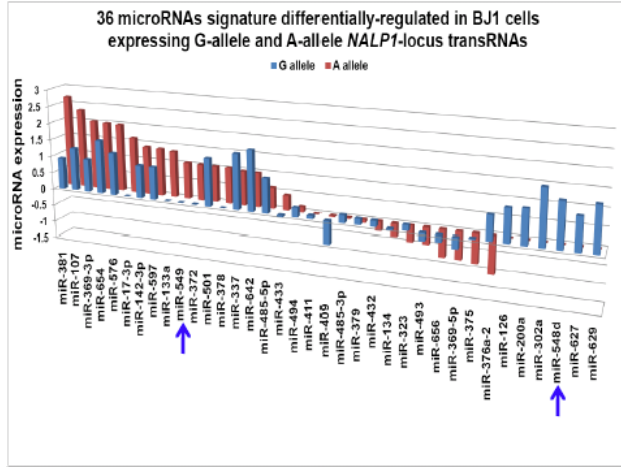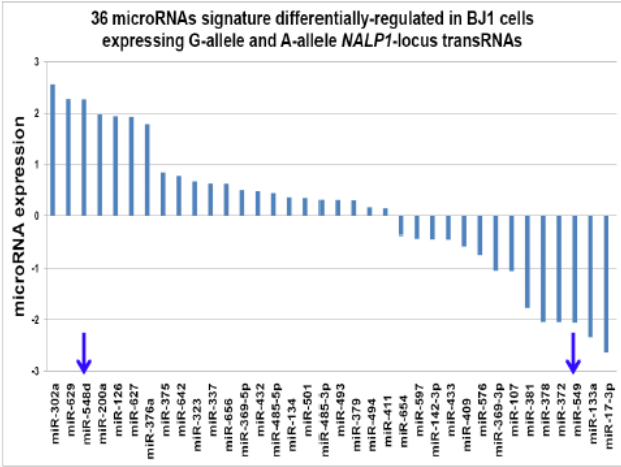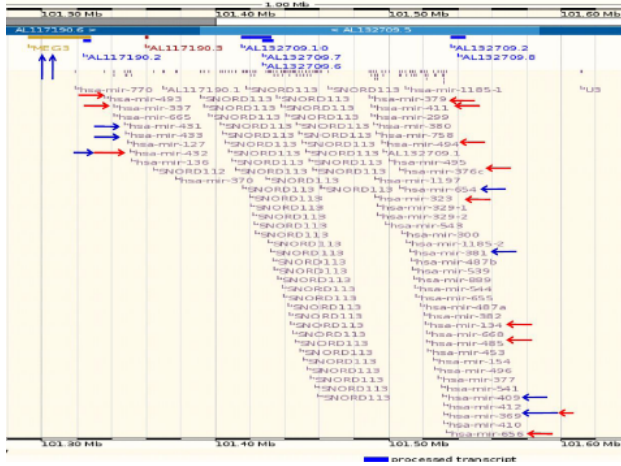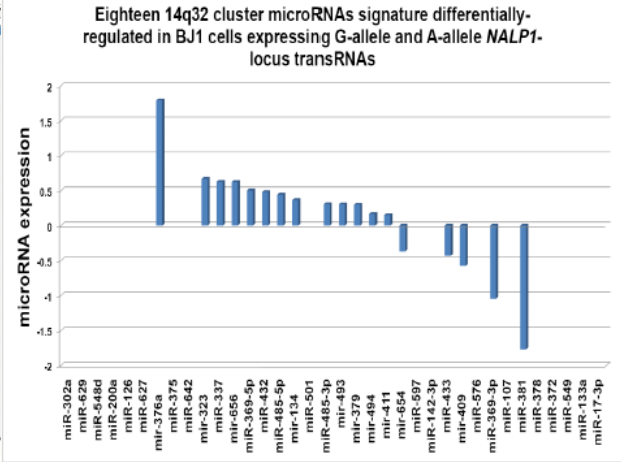



Figure S8.

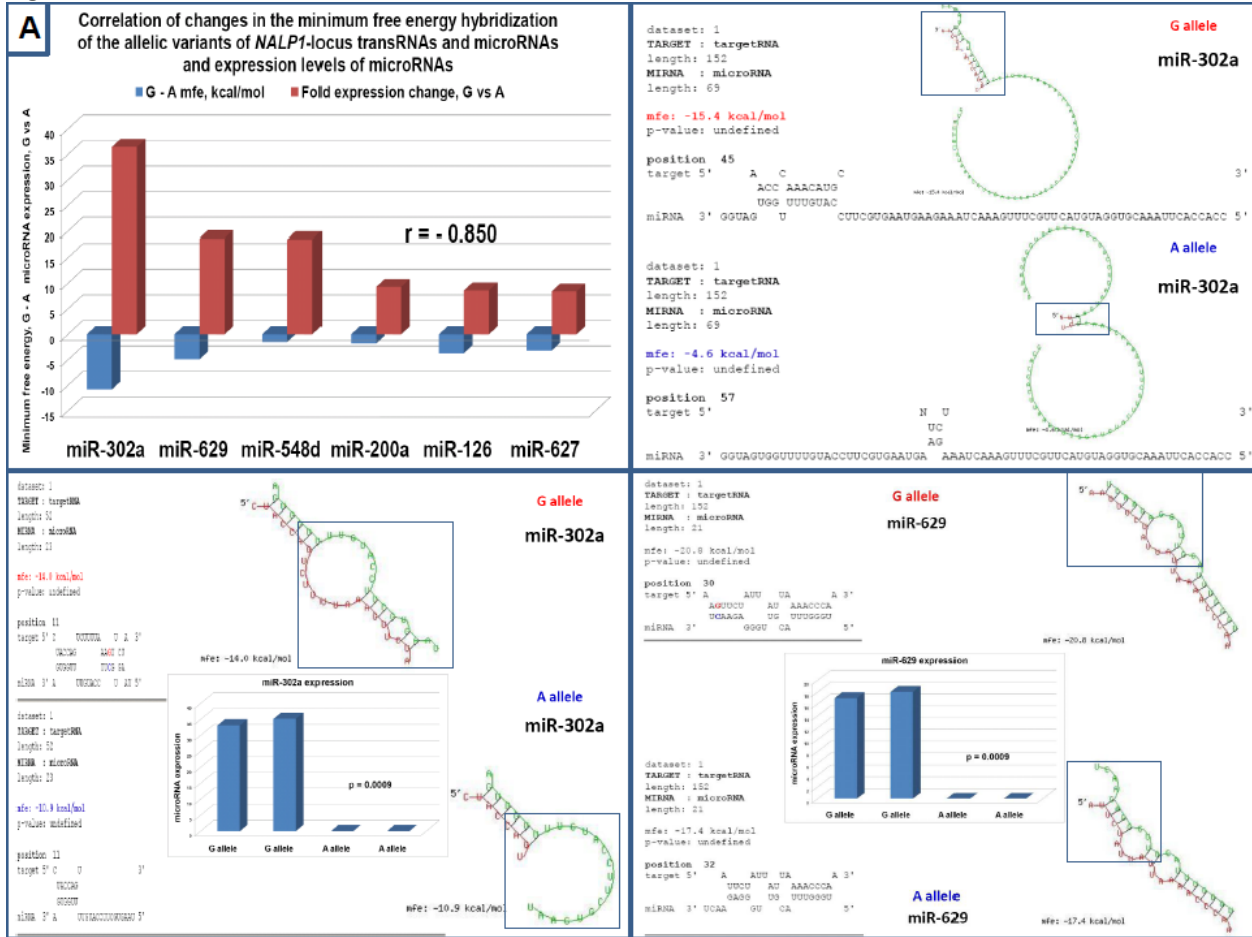

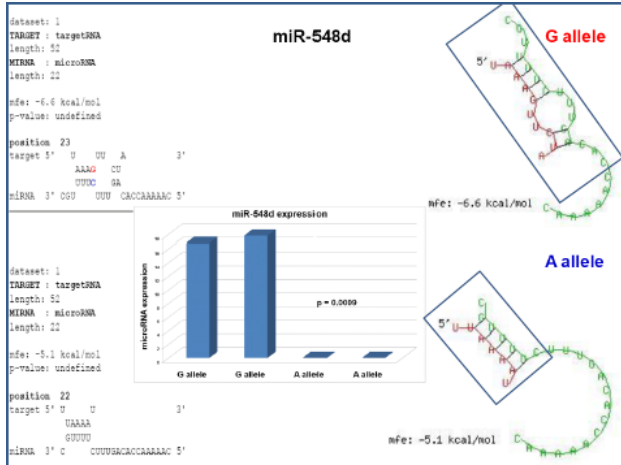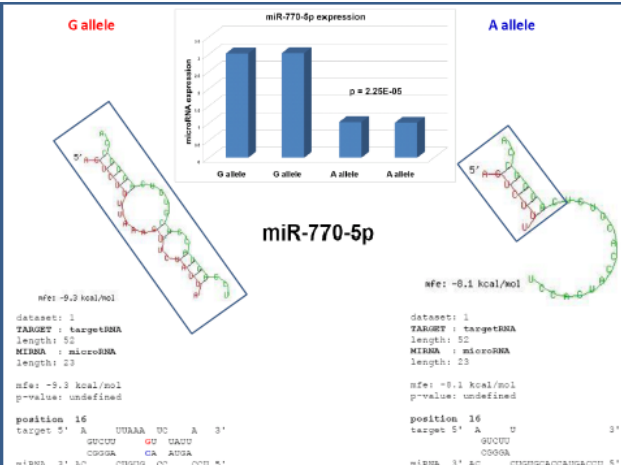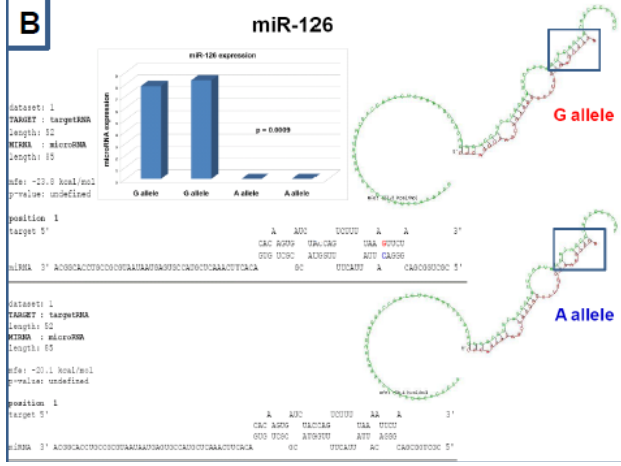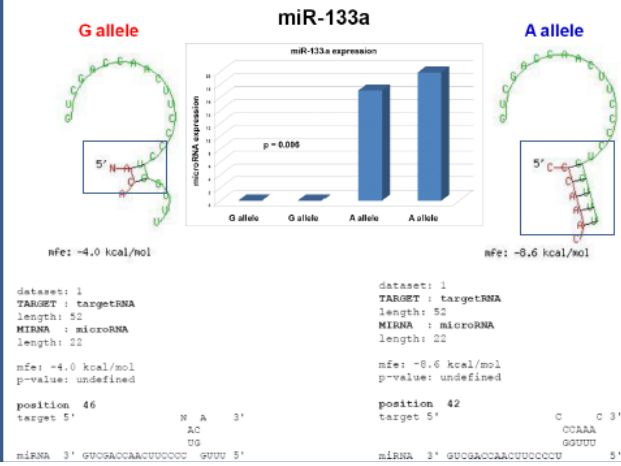







# E Allele equilibrium model of mechanisms of action of *NALP1*-locus trans-RNAs

CCACGCACAAGTCTACCAGTCTTTTAAAG/A|TTCTATTATTTAAACCCAAACATGCTCTTTCATTCCACAGAACAAGCTGGGTC TAAATTTAGACTGGTGCATCCTGATGCTGCACCAGTCTGCTCTTAATTTAAGGCATACAGGCATCTTG

CACAAGTCTACCAGTCTTTTAAAG/A|TTCTATTATTTAAACCCAAACATGC

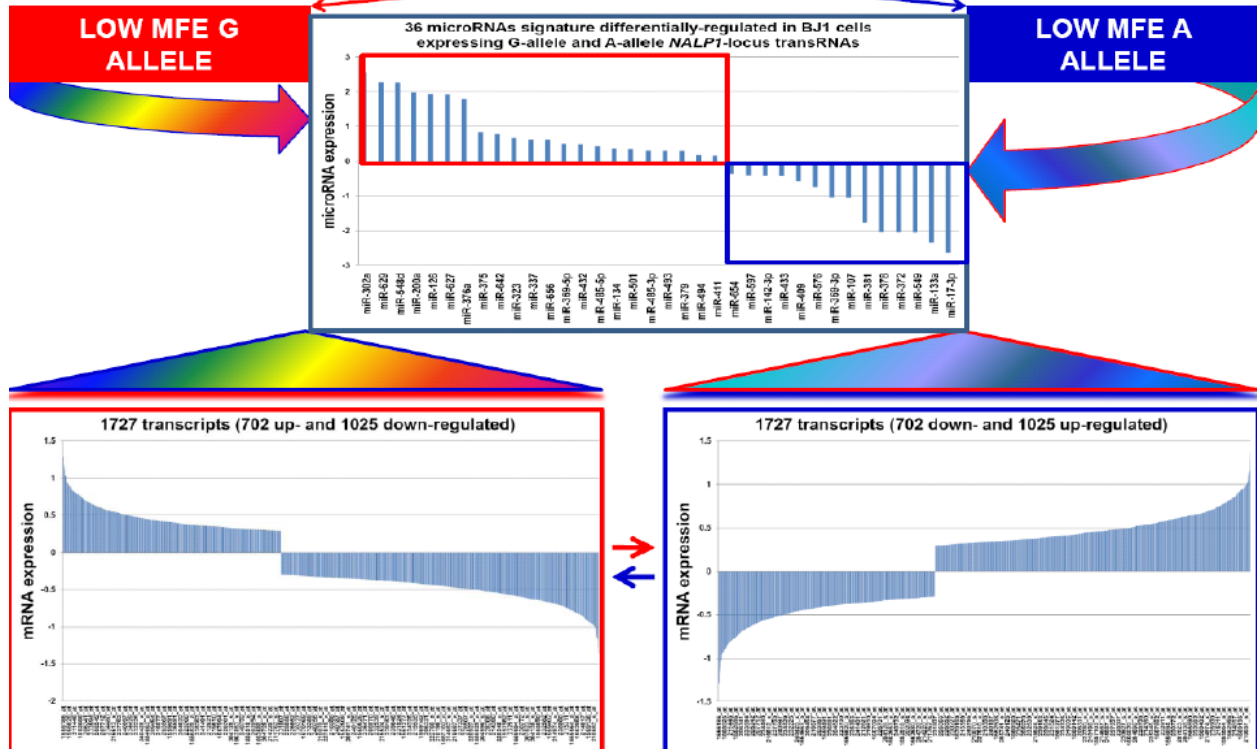

Figure S9.

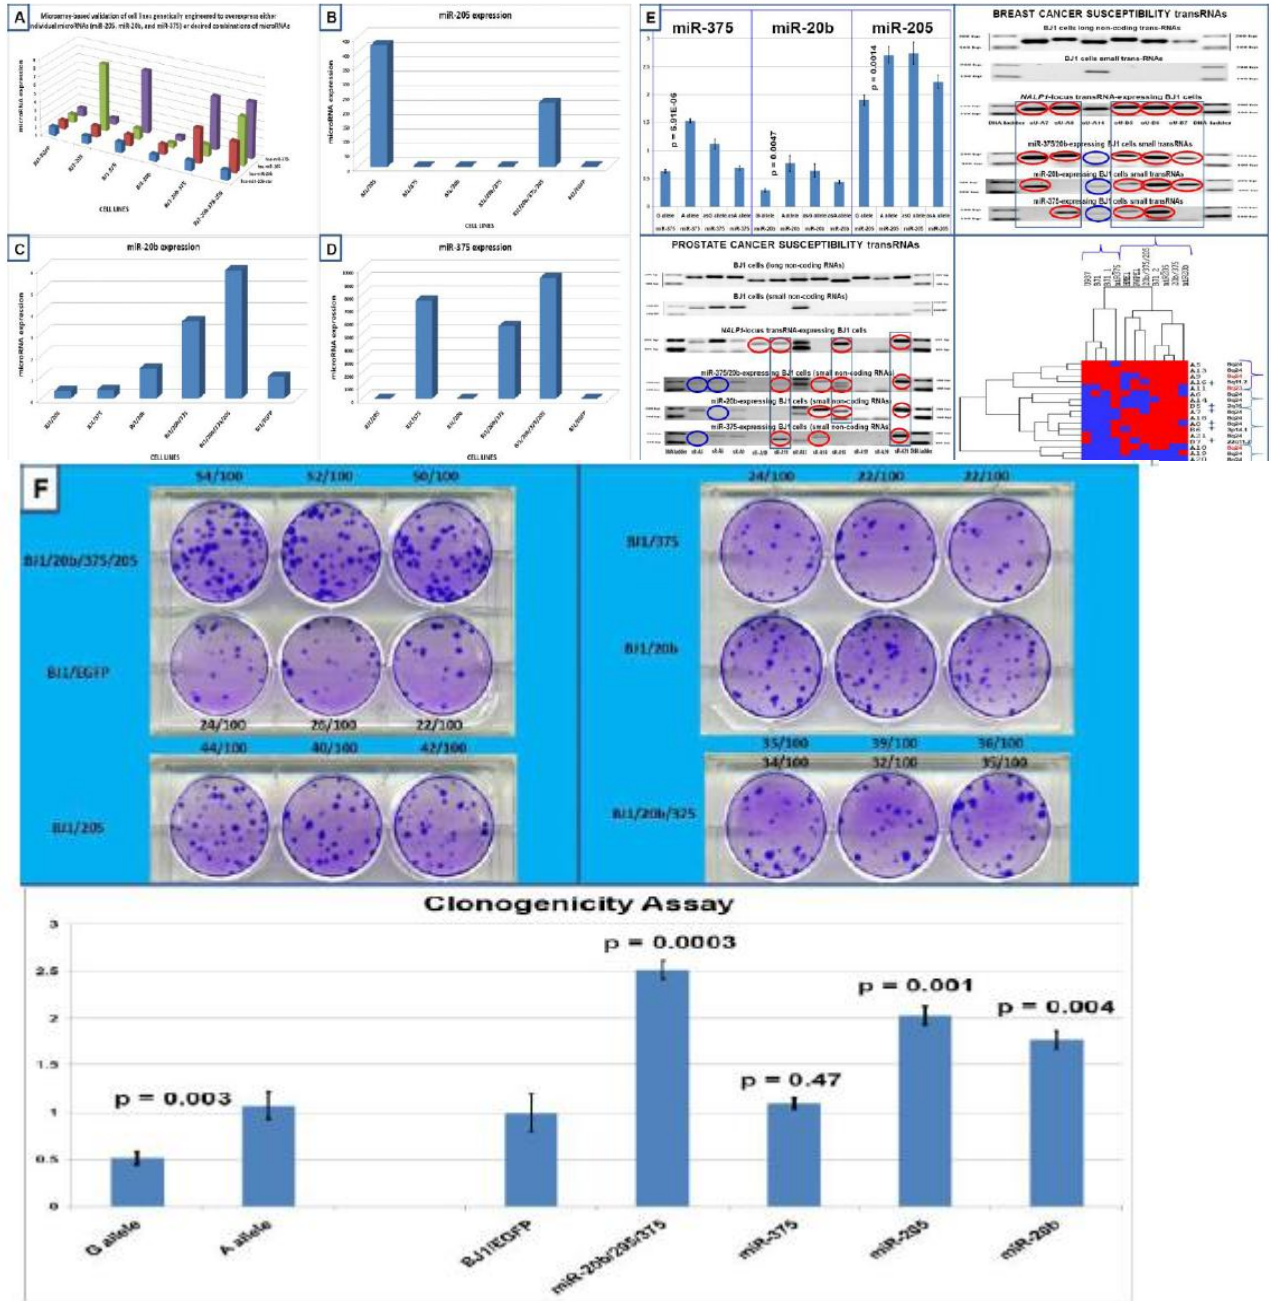

Figure S10.

Expression of NALP1-locus SNP-RNA-  
regulated “stemness” microRNA in  
human prostate cancer

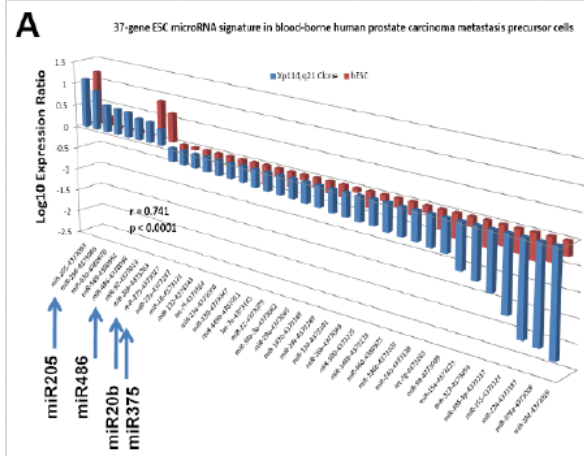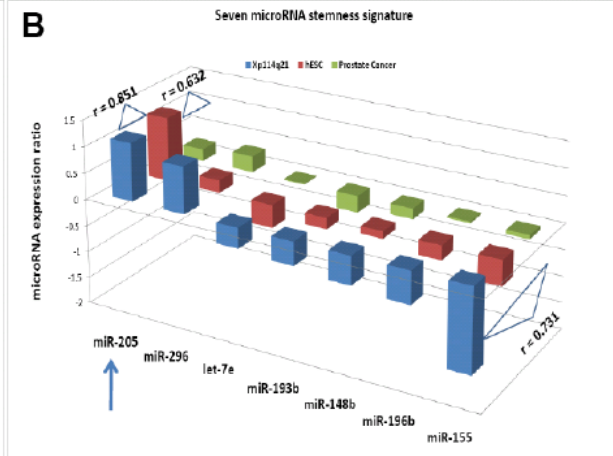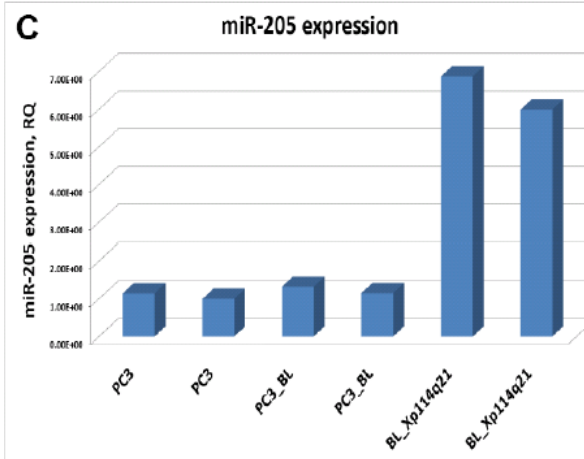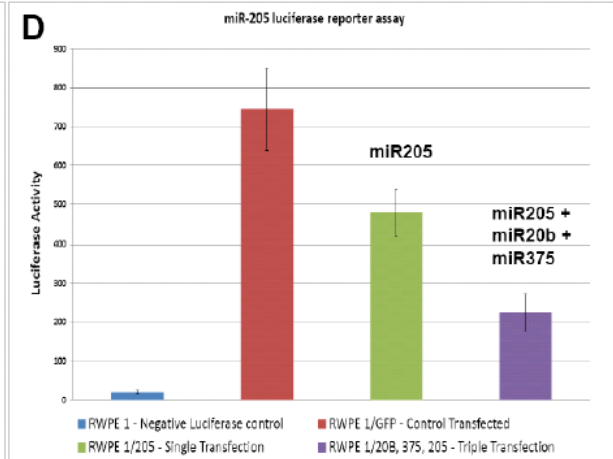

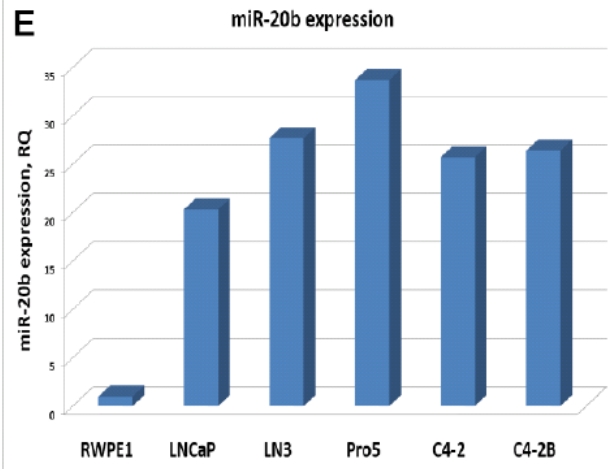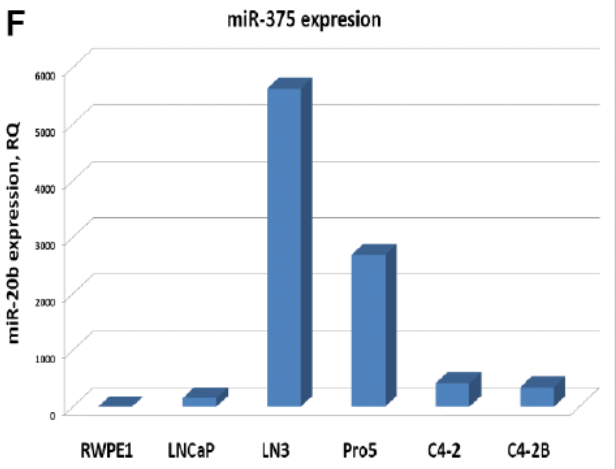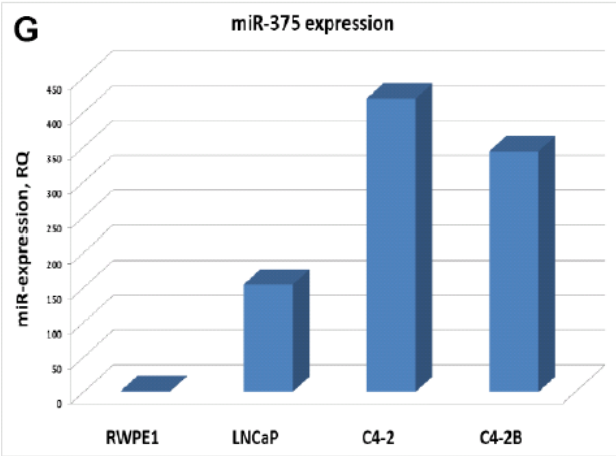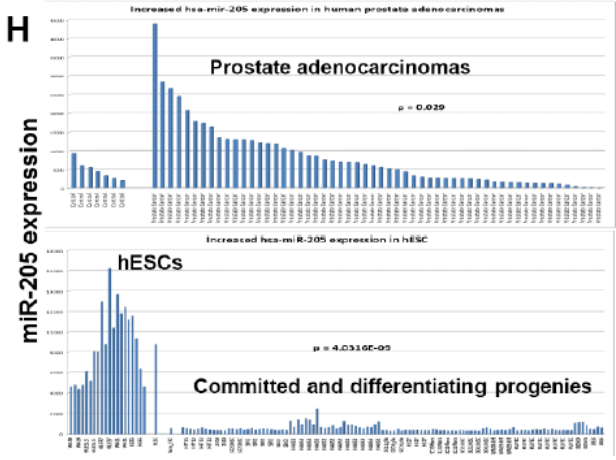

I

***NALP1*-locus SNP-RNA-regulated 'stemness' microRNAs enhance colony formation in agar by RWPE1 normal prostate epithelial cells**

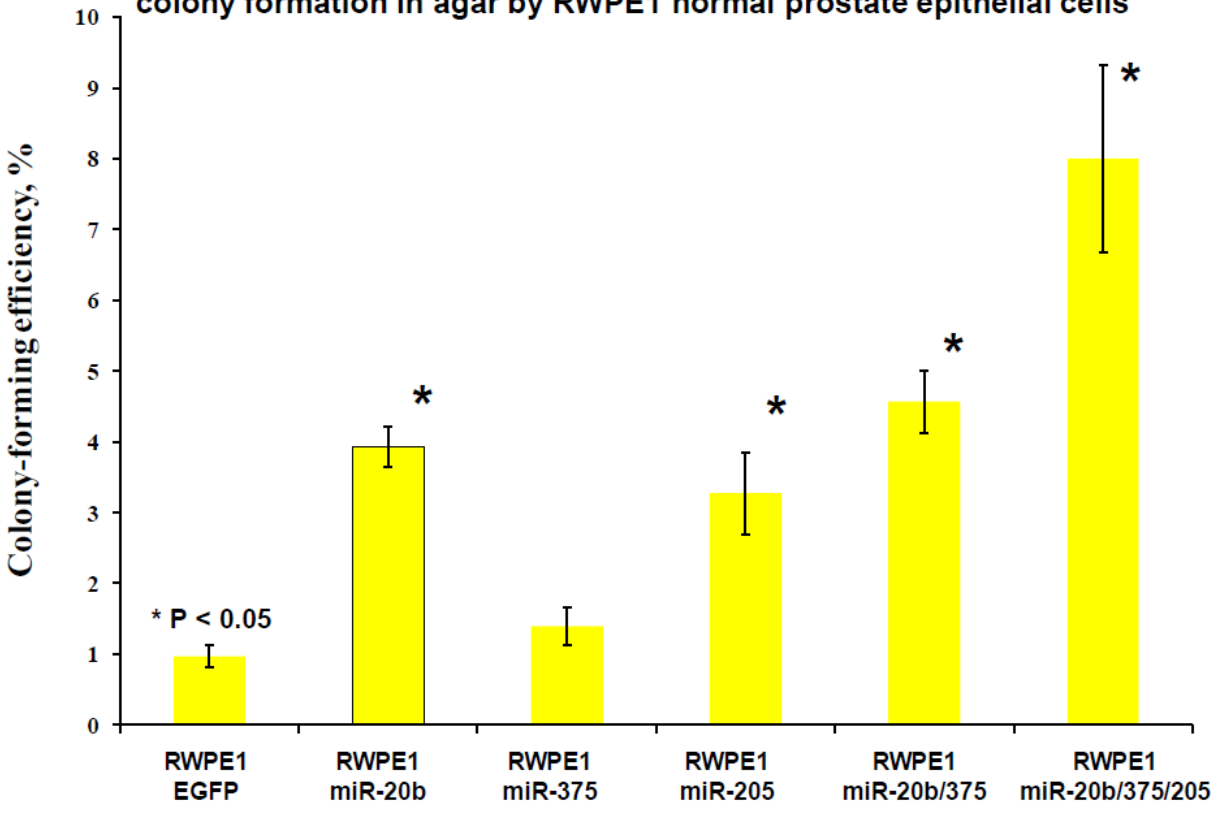

Supplement: cc1020_3571SD1.pdf [file cc1020_3571SD1.pdf]
