# Supplementary material
Source: PubMed Central journal article supplement (PMC3266183)
Supplement: cc1020_3571SD2.pdf [file cc1020_3571SD2.pdf]

Supplemental Tables: Table S1 (numbers in the second column refer to the SNP ID)

**PRIMER A SET**

|                | name        | label | sequence                 | Annealing T (°C) | Expecting size |
|----------------|-------------|-------|--------------------------|------------------|----------------|
| Primer set A1  | 6458307-F1  | A1F   | TCTTTAATACAGATTGGGAAGAGG | 59               | 150 bp         |
|                | 6458307-R1  | A1R   | AACTTTCAACTGCCAGGACA     | 58               |                |
| Primer set A2  | 99472138-F1 | A2F   | ACAGTTGTGCAACCATCAGC     | 59.8             | 165 bp         |
|                | 9472138-R2  | A2R   | GACTTTCTGGAAAAGGCAAAA    | 58.5             |                |
| Primer set A3  | 6596075-F1  | A3F   | TTGTGTTCAAGCCTCCTTCC     | 60               | 171 bp         |
|                | 6596075-R1  | A3R   | TCTGAGCTTAGCCTCCCTGA     | 60.2             |                |
| Primer set A4  | 2544677-F1  | A4F   | GGAAAACACTGGGAGGGAAT     | 60               | 178 bp         |
|                | 2544677-R1  | A4R   | CCTGGGTGACAGAGGAAGAC     | 59               |                |
| Primer set A5  | 6983561-F1  | A5F   | GGTTCTGTGAAGCGGGTAAA     | 60.1             | 177 bp         |
|                | 6983561-R1  | A5R   | TCATGGACCACAAATTTCCA     | 59.8             |                |
| Primer set A6  | 16901979-F  | A6F   | GTGGGGTCTTTGTTGTGGAG     | 60               | 188 bp         |
|                | 16901979-R  | A6R   | TGTCAGAGCGGTTGAATGA      | 60               |                |
| Primer set A7  | 672888-F    | A7F   | GCCATGTCTAACTGGGCATT     | 60               | 153 bp         |
|                | 672888-R    | A7R   | GCTGAGTGATGCTGGCAATA     | 60               |                |
| Primer set A8  | 13281615-F  | A8F   | GACACGTGGAATTTACTCTTTTGA | 59.6             | 168 bp         |
|                | 13281615-R  | A8R   | GCCAAGCCTACACTTCTCTT     | 59.7             |                |
| Primer set A9  | 10505477-F  | A9F   | CCGTGGGAAACAAAGTCTTC     | 59.6             | 185 bp         |
|                | 10505477-R  | A9R   | TTCCAACCTGAAACACACACA    | 60               |                |
| Primer set A10 | 10808556-F1 | A10F  | CTCCATAGAGCCTGCAGAGG     | 60               | 150 bp         |
|                | 10808556-R1 | A10R  | TTATTCGTCCCTCTGTTTTATGG  | 59.4             |                |
| Primer set A11 | 6983267-F   | A11F  | TCCTTTGAGCTCAGCAGATG     | 59.6             | 154 bp         |
|                | 6983267-R   | A11R  | TGAGAACTTGCTGGGTTCC      | 60               |                |
| Primer set A12 | 7014346-F   | A12F  | GCTTGCAGCTTCTGCCTAAT     | 59.8             | 160 bp         |
|                | 7014346-R   | A12R  | AACTTTTGGGGAGGCTGTTT     | 60               |                |
| Primer set A13 | 7000448-F   | A13F  | AGGCTCCTTAGGGAAGGTGA     | 60               | 165 bp         |
|                | 7000448-R   | A13R  | GAGATTGTGCCACTGCACTC     | 59.4             |                |
| Primer set A14 | 1447295-F   | A14F  | GAGTTGCACGCCAGACACTA     | 60               | 173 bp         |
|                | 1447295-R   | A14R  | AGGGGTTCTGTTGCTTTTT      | 60               |                |
| Primer set A15 | 2820037-F   | A15F  | AGTGATTGCTCTAATTGCCAAG   | 58               | 191 bp         |
|                | 2820037-R   | A15R  | GCGCATGAGGTCTATGTTGA     | 59               |                |

|                |           |      |                             |      |        |
|----------------|-----------|------|-----------------------------|------|--------|
| Primer set A16 | 889312-F  | A16F | GGCCATCTGTTTTACCAACC        | 59   | 151 bp |
|                | 889312-R  | A16R | TGGGAAGGAGTCGTTGAGTT        | 59   |        |
| Primer set A17 | 1937506-F | A17F | CGGGAAAGTAAAAATTGTTATCTCATT | 61   | 156 bp |
|                | 1937506-F | A17R | GAGGACCAATCCTTTGGACA        | 60   |        |
| Primer set A18 | 1937506-F | A18F | AAAGAGGTAACCCAGGGAACA       | 59   | 151 bp |
|                | 1937506-F | A18R | CATAAGCCTTCGCTGACTCC        | 60   |        |
| Primer set A19 | 1937506-F | A19F | TGAGCCAGGACATCAGAAAG        | 59   | 189 bp |
|                | 1937506-F | A19R | CCATCCCTGTGAGTCATCCT        | 59   |        |
| Primer set A20 | 1937506-F | A20F | TTCTCTCCAGATTGATACACAGC     | 58.5 | 166 bp |
|                | 1937506-F | A20R | AATGCCTTGCCAATACCAC         | 59   |        |
| Primer set A21 | 1937506-F | A21F | TCACAGGAAAATTGAGCAGAAA      | 59.9 | 178 bp |
|                | 1937506-F | A21R | ATGTGCAATGCCAAGAATGA        | 60   |        |
| Primer set A22 | 1937506-F | A22F | GTAGCCCCACTTCGCCAAT         | 62   | 116 bp |
|                | 1937506-F | A22R | TCCCTATCGCAGAGGAAAAA        | 59.8 |        |
| Primer set A23 | 1937506-F | A23F | AACGGTCAGACGCAAACAGT        | 60   | 196 bp |
|                | 1937506-F | A23R | GGCAGCTCCTCATTCTAAA         | 60   |        |
| Primer set A24 | 1937506-F | A24F | GACCAAATTGAAGAATTGGTTTG     | 59   | 174 bp |
|                | 1937506-F | A24R | ACTTGAGCTCGATCCACAGC        | 60   |        |
| Primer set A25 | 1937506-F | A25F | TCAATCCCCATATGCACAGA        | 59   | 153 bp |
|                | 1937506-F | A25R | ATGACATGCTCTCACGATGG        | 59   |        |
| Primer set A26 | 1937506-F | A26F | TGGCAGTCCAAGCTACTAAGAA      | 59   | 177 bp |
|                | 1937506-F | A26R | TGCTGCATGGTAAATTTTTG        | 57   |        |
| Primer set A27 | 1937506-F | A27F | GGGAAACGAAGGATGAAAGA        | 59   | 123 bp |
|                | 1937506-F | A27R | TTCTGGTTGATTTCCCTTC         | 59   |        |
| Primer set A28 | 1937506-F | A28F | CCATGAGCCTATCACACTCG        | 59   | 154 bp |
|                | 1937506-F | A28R | TGCCGATATTTCCGATTTTC        | 59.9 |        |
| Primer set A29 | 1937506-F | A29F | ATGTTTCATCAGTGGTCACAAATA    | 57   | 123 bp |
|                | 1937506-F | A29R | GGCTCATGGTAGGTCGTCAT        | 60   |        |

Supplemental Tables: Table S2 (numbers in the first column refer to the SNP ID)

**Primers Set B**

|                            | Primer sequence |                          | Expecting size | Annealing T |
|----------------------------|-----------------|--------------------------|----------------|-------------|
| Primer set B1<br>10186922  | Forward F       | AGCTCTGACTCCCAACTCCA     | 236 bp         | 60          |
|                            | Reverse R       | CGACAGATGGCTACAAAGCA     |                | 60          |
| Primer set B2<br>11159647  | Forward F       | GCTCACTACCTGGGTGCAAT     | 166 bp         | 60          |
|                            | Reverse R       | TTGTCAGCATTTCAGATTTC     |                | 57          |
| Primer set B3<br>2609653   | Forward F       | TGTGCACAAGAGCATTGTTTT    | 203 bp         | 59.4        |
|                            | Reverse R       | CCAGGATCATCCATGTTGTG     |                | 59.8        |
| Primer set B4<br>7570682   | Forward F       | GAGTGATGGAGTGGCATAGG     | 213 bp         | 58          |
|                            | Reverse R       | AACCCCTACATGCTTCCTT      |                | 59.2        |
| Primer set B5<br>13387042  | Forward F       | CCCTGTTTTGTTGCAGTGAA     | 172 bp         | 59.7        |
|                            | Reverse R       | ACGGAGCACTCTCAACATCC     |                | 60          |
| Primer set B6<br>2291533   | Forward F       | CAGAAGCAGCAGCAGGTACA     | 158 bp         | 59          |
|                            | Reverse R       | AAGCTACTGGCCCAAAGACA     |                | 60.1        |
| Primer set B7<br>2822558   | Forward F       | TATCGACAAAAGTTTTCCACTG   | 157 bp         | 59.4        |
|                            | Reverse R       | CCCTGCTAACACTGCTGGAC     |                | 60          |
| Primer set B8<br>10795668  | Forward F       | GGCATTGCGTTCATTCTGA      | 215 bp         | 59          |
|                            | Reverse R       | AGCGAGACTCCGTCTGAAAA     |                | 60          |
| Primer set B9<br>4779584   | Forward F       | AGCTGCTATAAGATGGGCTGA    | 181 bp         | 59          |
|                            | Reverse R       | TGCCACTGCTAAAAGCCATT     |                | 60          |
| Primer set B10<br>10757274 | Forward F       | GTTTCTGCACATGGTGATGG     | 250 bp         | 60          |
|                            | Reverse R       | CTGCCTCACTCTCCAGTTCC     |                | 60          |
| Primer set B11<br>10757278 | Forward F       | CAAACAGCCAATTTGTGGAG     | 182 bp         | 59.2        |
|                            | Reverse R       | GGCGTTACAATTAAGAGAGAGAGA |                | 59.5        |
| Primer set B12<br>1333049  | Forward F       | TCTGCTTCATATCCAACTTGTG   | 182 bp         | 59          |
|                            | Reverse R       | TGCTTCTGCATACTTTTGTCAAC  |                | 59          |
| Primer set B13<br>2383206  | Forward F       | GGCCCGATGATTTTCAGTTA     | 170 bp         | 59          |
|                            | Reverse R       | GACATAGCTCTACAGCTGGGAAT  |                | 59          |
| Primer set B14<br>2383207  | Forward F       | ACTTAGCCCTTGGGACCATT     | 156 bp         | 59.8        |
|                            | Reverse R       | AAGAAGCTAAGAGAATGTTGAGCA |                | 58.9        |
| Primer set B15<br>383830   | Forward F       | GACCCCTGATGTAACTACTCTTTG | 193 bp         | 59.2        |
|                            | Reverse R       | GCTGGTGGGTTTCTGTAGGA     |                | 60          |

Supplemental Tables: Table S3 (rs numbers in the first column refer to the SNP ID)

**Primers Set\_C**

|                              | Primer sequence |                         | Expecting size | Annealing T |
|------------------------------|-----------------|-------------------------|----------------|-------------|
| Primer set C1<br>rs7250581   | Forward F       | CTCCAAAAGCCAGGAGAATG    | 214 bp         | 59.8        |
|                              | Reverse R       | CCCGTGTGGCTGCATATTA     |                | 60          |
| Primer set C 2<br>rs10733113 | Forward F       | CACAGTCTGTTACAAGGGTGGGA | 187 bp         | 60          |
|                              | Reverse R       | TACTTCTTGCGGCCTGTCTT    |                | 60          |
| Primer set C3<br>rs10761659  | Forward F       | GGATTCTTCGCATGATGAGG    | 244 bp         | 60          |
|                              | Reverse R       | AGTCAAAGAGGAGGGCGTTT    |                | 60          |
| Primer set C4<br>rs10883365  | Forward F       | GAAGGCCGCATAAGACGTTA    | 235 bp         | 60          |
|                              | Reverse R       | CGTGTCTCTTCCAGCGCTAT    |                | 60.6        |
| Primer set C5<br>rs17234657  | Forward F       | AGTGCTGAAGCGGAATTGAG    | 215 bp         | 60          |
|                              | Reverse R       | ATGAGCAGCAATGGTCACAG    |                | 59.7        |
| Primer set C6<br>rs55646866  | Forward F       | AGAGTCCTCAGCCTCGTCAG    | 243 bp         | 60          |
|                              | Reverse R       | CGAGAAAGCAAGCTTCAGGT    |                | 59.8        |
| Primer set C7<br>rs6672995   | Forward F       | AGGGTTCCTGGCTCCTACAG    | 190 bp         | 60          |
|                              | Reverse R       | CAGAGGGTTGGGTTCCAGTA    |                | 60.1        |
| Primer set C8<br>ss107635144 | Forward F       | GCGTGGTGAGGTGACTACTG    | 165 bp         | 59          |
|                              | Reverse R       | AAGAAAACACAAGTGAGGCACA  |                | 60          |
| Primer set C9<br>rs12037606  | Forward F       | CTGGCAGAGGATTTGAGACA    | 173 bp         | 59          |
|                              | Reverse R       | AGGTAGCTCAGCTGTTTCATGG  |                | 59.3        |
| Primer set C10<br>rs6601764  | Forward F       | ACCAGTGGTCCAACCCACTA    | 221 bp         | 60          |
|                              | Reverse R       | TCACCATCTGGAAGGCTTTT    |                | 59.2        |
| Primer set C11<br>rs7807268  | Forward F       | GGAGGACAGGTTGGAGAACA    | 190 bp         | 59.8        |
|                              | Reverse R       | AAGGGACTGGAAGGGTGATT    |                | 59.4        |
| Primer set C12<br>rs6957669  | Forward F       | CTAGGCGTTTGCATTTCATCC   | 223 bp         | 59.6        |
|                              | Reverse R       | TGACGCAAAGACTGAAAGGA    |                | 60          |
| Primer set C13<br>rs12970134 | Forward F       | GGTGGTGACTACTGCCCTTG    | 203 bp         | 59.4        |
|                              | Reverse R       | CAGTGTGGAGACATGCTTGC    |                | 60.3        |
| Primer set C14<br>rs17782313 | Forward F       | CTTGGAAGCAGGAAAACCAG    | 180 bp         | 59.7        |
|                              | Reverse R       | GCTACCTCAATCCCAGATGC    |                | 59.2        |
| Primer set C15<br>rs1859962  | Forward F       | CCCGGAAGGCAAATAACAAT    | 166 bp         | 60.1        |
|                              | Reverse R       | TTGGGAAATTTAGCCCCATT    |                | 59.5        |
| Primer set C16<br>rs983085   | Forward F       | GGAATTGTACACCATCACCAA   | 154 bp         | 59.6        |
|                              | Reverse R       | TTTGTCAAATGCTTTTCTCCA   |                | 59.7        |

Primer set for C13 did not generate the expected product

Supplemental Tables: Table S4 (rs numbers in the second column refer to the SNP ID)

## PRIMER SET D

## PRIMER D SET

|                | name         | LABEL | SEQUENCE                      | Expecting size | Annealing T | total U937 | total BJ1 |
|----------------|--------------|-------|-------------------------------|----------------|-------------|------------|-----------|
| Primer set D1  | rs10490072-F | D1F   | TGCAAGCTCCAAGAGAGTGA          | 174            | 59.9        |            |           |
|                | rs10490072-R | D1R   | AGGCCCGTGTCTGTAATAA           |                | 59.5        |            |           |
| Primer set D2  | rs1153188-F  | D2F   | GAAGATGGTCTGAATGGCAAA         | 150            | 60.1        |            |           |
|                | rs1153188-R  | D2R   | TGTTTCGTCCACTGGATCTG          |                | 59.7        |            |           |
| Primer set D3  | rs13071168-F | D3F   | CCCACATCCAGACTTCTGCT          | 217            | 60.3        |            |           |
|                | rs13071168-R | D3R   | AGCTGTTTGGCTTTGGTGAT          |                | 59.7        |            |           |
| Primer set D4  | rs17036101-F | D4F   | ATTAGGGGCCAGGAAAGAAA          | 213            | 59.9        |            |           |
|                | rs17036101-R | D4R   | TGCCTGGCATTAAAAATCT           |                | 57.4        |            |           |
| Primer set D5  | rs17705177-F | D5F   | TCAGTTTCCTTCCCCAGAAA          | 170            | 59.6        |            |           |
|                | rs17705177-R | D5R   | GCACGTTCTGCACGTTGTAT          |                | 59.8        |            |           |
| Primer set D6  | rs358806-F   | D6F   | ACTTTCTGGAGGGCAGTTTG          | 183            | 59.3        |            |           |
|                | rs358806-R   | D6R   | GCTCATCATTTTAAAGTGGTACGA<br>A |                | 60.7        |            |           |
| Primer set D7  | rs5015480-F  | D7F   | GCTCACCTAGGGAAGTGTTTC         | 172            | 60.1        |            |           |
|                | rs5015480-R  | D7R   | GCCACATTGTAGGTGCTCAA          |                | 59.7        |            |           |
| Primer set D8  | rs7020996-F  | D8F   | CATTGTGGGGGAAAGTCTGT          | 171            | 59.8        |            |           |
|                | rs7020996-R  | D8R   | TCCTCAATGTTCAACCCCTTA         |                | 59.4        |            |           |
| Primer set D9  | rs7659604-F  | D9F   | GCAATGTGTTAGGGTAGAGAAC<br>A   | 203            | 59.6        |            |           |
|                | rs7659604-R  | D9R   | TGAACAGCCTCTCTTGGAGAA         |                | 60.1        |            |           |
| Primer set D10 | rs2716914-F  | D10F  | CGAACCAGAGGGCATAAGAG          | 150            | 59.8        |            |           |
|                | rs2716914-R  | D10R  | CAAGATCATGGGCTTCACAA          |                | 59.6        |            |           |
| Primer set D11 | rs2733359-F  | D11F  | GAGGGTTGTGACGGTCAACT          | 165            | 60          |            |           |
|                | rs2733359-R  | D11R  | CCAGCTTGAATACATGCAA           |                | 59.7        |            |           |
| Primer set D12 | rs35658367-F | D12F  | GAAGAATTTGGCAGTGAGC           | 199            | 59.8        |            |           |
|                | rs35658367-R | D12R  | ATCCATGGCCATTTCATTAT          |                | 60          |            |           |
| Primer set D13 | rs3926687-F  | D13F  | GGCAAGGAGGCAGAACAGT           | 150            | 60.4        |            |           |
|                | rs3926687-R  | D13R  | GGGGGAAATGAATTGTCAAA          |                | 59.6        |            |           |
| Primer set D14 | rs4790796-F  | D14F  | AGGTGGTGTGGTTTTGTCC           | 205            | 59.7        |            |           |
|                | rs4790796-R  | D14R  | AAGACTTCAGCCTCTAAAACAAGA<br>A |                | 59.2        |            |           |
| Primer set D15 | rs4790797-F  | D15F  | GGAGCTCTTTGCAAACCTGTG         | 151            | 58.6        |            |           |
|                | rs4790797-R  | D15R  | AAGACTTCAGCCTCTAAAACAAGA<br>A |                | 59.2        |            |           |
| Primer set D16 | rs7223628-F  | D16F  | TCATCAGGGAAGAAGAGAGAGAA       | 167            | 59.6        |            |           |

|                |             |      |                          |     |      |  |  |
|----------------|-------------|------|--------------------------|-----|------|--|--|
|                | rs7223628-R | D16R | TGGAGCAGTTAAGGGAACTGT    |     | 60.2 |  |  |
| Primer set D17 | rs8182352-F | D17F | AACCGTGCTGTCTCAGCATA     | 158 | 59.5 |  |  |
|                | rs8182352-R | D17R | CAGTGTGTTTGACGGAGGAG     |     | 59.3 |  |  |
| Primer set D18 | rs8182354-F | D18F | TGCAAATGAGATTTGGCTGT     | 187 | 59.3 |  |  |
|                | rs8182354-R | D18R | GAGATGTGGCCTTACAAGGTG    |     | 59.6 |  |  |
| Primer set D19 | rs878329    | D19F | TCCACTCAACTCCCTCAACC     | 150 | 60.1 |  |  |
|                | rs878329    | D19R | AGCCAAGTTCTTGATCTGC      |     | 59.4 |  |  |
| Primer set D20 | rs11761231  | D20F | AAGGCATGCAGAGCTTTTGT     | 215 | 60   |  |  |
|                | rs11761231  | D20R | CAGCCCTGCCAATTACAGAC     |     | 60.7 |  |  |
| Primer set D21 | rs11162922  | D21F | TTTGTGATATCTTCTGTTTGGTA  | 213 | 57.1 |  |  |
|                | rs11162922  | D21R | CATGGGGAGAGAAAATACTCTGA  |     | 59.6 |  |  |
| Primer set D22 | rs2837960   | D22F | TGTTGCTGAGACCCTCAGTG     | 177 | 60   |  |  |
|                | rs2837960   | D22R | AGTCAAGCAGTAGCCCAGGA     |     | 60   |  |  |
| Primer set D23 | rs6920220   | D23F | TGCTACGGCAGCGTAACATA     | 193 | 60.4 |  |  |
|                | rs6920220   | D23R | GAAGCATAAATTTGCCTCATCA   |     | 59.2 |  |  |
| Primer set D24 | rs743777    | D24F | GCCTCCTGTGCTTTCTCACT     | 170 | 59.6 |  |  |
|                | rs743777    | D24R | GCCTCAGAGAGAATCGGATG     |     | 59.9 |  |  |
| Primer set D25 | rs6679677   | D25F | ATTTTTCAGGTGCCCTGTTG     | 188 | 60   |  |  |
|                | rs6679677   | D25R | GGGTTTCTCATTTAATCCTCACA  |     | 59.4 |  |  |
| Primer set D26 | rs12141187  | D26F | TCAGCATCAGTCACCTCAGC     | 179 | 60.1 |  |  |
|                | rs12141187  | D26R | <b>TCTTGGGGACATTGCTG</b> |     | 60.7 |  |  |
| Primer set D27 | rs2644577   | D27F | AATCTGGGCATAGCCAACAG     | 166 | 60.1 |  |  |
|                | rs2644577   | D27R | AGGCAAGGAGGGTTGTTCTT     |     | 60.1 |  |  |
| Primer set D28 | rs4132958   | D28F | TAGACACAGGCCTGCACAAA     | 222 | 60.4 |  |  |
|                | rs4132958   | D28R | GAGCTGGTATGCCCATCTACA    |     | 60.1 |  |  |
| Primer set D29 | rs4950437   | D29F | TTTTAATGCCCCATGAATATG    | 103 | 58.7 |  |  |
|                | rs4950437   | D29R | GGTTTCTGAGGTTGCACACA     |     | 59.7 |  |  |
| Primer set D30 | rs6684174   | D30F | CCAGAGTGGAAATCAGCAGGT    | 234 | 60.3 |  |  |
|                | rs6684174   | D30R | CGGCGCAGACTTTCTTTTAT     |     | 59.5 |  |  |
| Primer set D31 | rs8029320   | D31F | TGCATAAGCCAATTCCTTGC     | 209 | 61.1 |  |  |
|                | rs8029320   | D31R | AAATCGTTTGCTTGGGTGAG     |     | 60.1 |  |  |
| Primer set D32 | rs952477    | D32F | GCCTTCATGCCCTGACTTC      | 151 | 60.8 |  |  |
|                | rs952477    | D32R | GGCTTAAGGCAAATGGAATC     |     | 58.6 |  |  |
| Primer set D33 | rs10798269  | D33F | TGGACCATTTGAGGTGATGA     | 227 | 59.9 |  |  |
|                | rs10798269  | D33R | GAGAGACCTCCAGGGAAACC     |     | 60   |  |  |
| Primer set D34 | rs12537284  | D34F | AGGTTGCAGTGAGCCAAGAT     | 243 | 59.9 |  |  |
|                | rs12537284  | D34R | AATACGTAAGCGTGGGGTTG     |     | 59.9 |  |  |
| Primer set D35 | rs729302    | D35F | TGAAGCCCTGCTGAGAAAGT     | 155 | 60.1 |  |  |

|                |            |      |                       |     |      |  |  |
|----------------|------------|------|-----------------------|-----|------|--|--|
|                | rs729302   | D35R | TCCTACTGGGTGGACTCTGG  |     | 60.1 |  |  |
| Primer set D36 | rs11171739 | D36F | GGAGGGACCAATCAACAGTC  | 163 | 59.4 |  |  |
|                | rs11171739 | D36R | CTACCTACCCTCCCCACAT   |     | 60.1 |  |  |
| Primer set D37 | rs11052552 | D37F | TCCCTTAAGGCATAAGACAGC | 241 | 58.5 |  |  |
|                | rs11052552 | D37R | TGAGGCTGCAGTGAGCTATG  |     | 60.3 |  |  |

Supplemental Tables: Table S5 (rs numbers in the second column refer to the SNP ID)

### PRIMER SET E

|                | name       | LABEL | SEQUENCE                 | Expected size | Annealing T |
|----------------|------------|-------|--------------------------|---------------|-------------|
| Primer set E1  | Rs7716600F | E1F   | TGTGAACTTGATGGCAACCA     | 223           | 60          |
|                | Rs7716600R | E1R   | TCTTCCTTTTCACCATCTTCC    |               | 58.2        |
| Primer set E2  | Rs11249433 | E2F   | TTGGAAACATGGAATCCAAAA    | 150           | 60.2        |
|                | Rs11249433 | E2R   | ATATCTGTTGGAAAACCTTTAGCC |               | 59          |
| Primer set E3  | Rs3803662  | E3F   | TTGTCATCCAAAGCACCAAC     | 227           | 59.5        |
|                | Rs3803662  | E3R   | CCTGGTGTGTCCACAAAGA      |               | 59.6        |
| Primer set E4  | Rs393152   | E4F   | CCTACTGCCTTGAATCTGC      | 237           | 59.8        |
|                | Rs393152   | E4R   | GTCTCCGCTGACCTAACAGC     |               | 60          |
| Primer set E5  | Rs1491923  | E5F   | CTGCACCTTTGGCTTTTAGG     | 197           | 59.9        |
|                | Rs1491923  | E5R   | CCCTCTTCCCAACACACAT      |               | 59.8        |
| Primer set E6  | Rs2736098  | E6F   | CGTGGTTTCTGTGTGGTGTC     | 190           | 59.4        |
|                | Rs2736098  | E6R   | CCTTGTCGCCTGAGGAGTAG     |               | 59.9        |
| Primer set E7  | Rs801114   | E7F   | CTCCCAGTGCATCATTTTC      | 152           | 60.5        |
|                | Rs801114   | E7R   | AGCCACTTCTCCACAGAGG      |               | 59.5        |
| Primer set E8  | Rs2151280  | E8F   | ACTCGATGGCCCTCAAAG       | 150           | 60.2        |
|                | Rs2151280  | E8R   | CCCATTCTCAGAATTTTCATCA   |               | 59          |
| Primer set E9  | Rs4636294  | E9F   | GGGTTGAGCCAGATCTTCAA     | 173           | 60.2        |
|                | Rs4636294  | E9R   | GGGATGTAACAGGGAAACGA     |               | 59.8        |
| Primer set E10 | Rs823128   | E10F  | ACTGGCTTTGGGTTGTTTAC     | 190           | 60          |
|                | Rs823128   | E10R  | AGATGCCAAATAATTCCACCA    |               | 59.3        |
| Primer set E11 | Rs947211   | E11F  | AAAGGCCAGGGAAAGAAGAC     | 224           | 59.7        |
|                | Rs947211   | E11R  | ATGGCCTATGGGTGCAATAA     |               | 60.2        |
| Primer set E12 | Rs27360990 | E12F  | ATGTCTGCCTTTGCATCAGA     | 214           | 60          |
|                | Rs27360990 | D12R  | CTGTCAACTCTGCCAATGTGA    |               | 60          |
| Primer set E13 | rs12418451 | E13F  | GTAAGGGAGTGCTGCTCCTG     | 236           | 60          |
|                | rs12418451 | D13R  | ACACACACACATCGCTGGAT     |               | 60          |
| Primer set E14 | rs10896449 | E14F  | agcagaatgtggaaggatgg     | 205           | 60.1        |
|                | rs10896449 | D14R  | ccaaggttcagcctcatctc     |               | 59.8        |

**Supplemental Tables: Table S6 (rs numbers refer to the SNP ID)**

A26: rs9469220

ATAAATTACCATTCAAACCTGCC[A/G]GTAGAAATATAAAATTGTAAGGAATAAATTCCACAAAAAATACAGTGTTTTAATTACAAAAATTTACCATG  
CAGCA

TGGCAGTCCAAGCTACTAAGAAGCACAAATAAAATATATAGTAGCAGGGGGAGATGGGAAGGGTGAGAGAATGTAGGATAAATTACCATTCAA  
CTGCC[A/G]GTAGAAATATA

TGGCAGTCCAAGCTACTAAGAAGCACAAATAAAATATATAGTAGCAGGGGGAGATGGGAAGGGTGAGAGAATGTAGGATAAATTACCATTCAA  
CTGCC[A/G]GTAGAAATATAAAATTGTAAGGAATAAATTCCACAAAAAATACAGTGTTTTAATTACAAAAATTTACCATGCAGCA

A29: rs9270986

ATGTTTCATCAGTGGTCACAAATATAATGTATCTAAAATAGGGACAGTAAGAAATTACTGGGCATAACTAG[A/C]AGGTGCCATGGGATGTGCCTG  
GAAAGCTTCTCATGACGACCTACCATGAGCC

ATGTTTCATCAGTGGTCACAAATATAATGTATCTAAAATAGGGACAGTAAGAAATTACTGGGCATAACTAG [A/C]

A25: rs6457617

TAGTCA[C/T]ATCTGCTCATGGACTCAACAAACAGTAATTGAGTCCACTGACTGCATTTTCGGAAATCCACACTCATGATCTTCCTCTG

A28: rs615672

GTGGTTAGGAAAA[C/G]AGAAATAAGAAACAACAGCAGAATGCACCGTCAGGTACTTTGGAAGTCACAGAAGGGAAAAGGGCAGG

A18: rs4242382

CCCAGGGAACATTTTGTCCCTCTAGTTATCTTCCC[A/G]CAGGCCCATCAAGAATCAGGCAGTAGGTGAAAAAGAAACACAGAGAACCTAGGAA  
CACAATAG

A13: rs7000448

GAGCAGAGGAGCAG[C/T]ATTTTTGAGAATCTGGCCAATATGGAAAGATTTGCTGACATATTCAGATTTGAGACTTTTTTTTTTTTTAGACGGAGTT  
TTGCTCTTGCCACTCAGGCTGGAGTGCAGTGGCACAATCTC

A14: rs1447295

TGAGTTGCACGCCAGACACTATACTAGATGATGGGACAACTAAAGGGTAATGAACAGTTCTGTCTCTATGTAAAAATAATAATGATGATGATGAT  
GAGATGGGACTTCAATTGAGGAAGTGCCATTGGGGAGGTATGTAAAA[A/C]GTGCTATGGAAAAAAGCAACAGGAACCCCT



A1: rs6458307

TCTTTAATACAGATTGGGAAGAGGATTACTTTTTCTGTCTCAGGTTCTTCAGGATAAAGGATAAAGATTTGGAGATCGTTTAAAAGCTTTTATATAA  
ATGCTCATTCA[C/T]TGAGTTCAAATACTTTTAAAATGTCCTGGCAGTTGAAAGTTA

A2: rs9472138

gaacactctgttacctaagcacgttctcctcata[C/T]cgttgtcgtcaatcctaccacggctaccagtcctcaggcagctactaatctatctgctttttctgtgtaatttgcctttccagaaagtc

A5: rs6983561

ATAGAACATATAGCAC[A/C]AAATGATTATATCAATAGAATGCTAATTGCATATCAAGGATATTTGGTATAATACAAATTATTCTACCTTAAACATAT  
GGAAATTTGTGGTCCATGA

A7: rs672888

GGGCATTTTCTGTGCTACTATTCTTAAGAGAATTATCTCACTCAATCCTCACTGCAGCTCTAGGAGCTAGATACTGTTATTG[C/T]CACTTTCTTAA  
AGGTAAAGAAACACAGATATTAGGCCTATTGCCAGCATCACTCAGCA

A4: rs2544677

TAATCTTTGTCTTTATGAA[C/G]GTCTAGAGGATTCTACCATAAAAATTAGGAAAGATAAGTTAGAAATGTTGAAACATAGAAAGTATTATAACTAGA  
ACGCATTTAATACTTGTAttttaattttgagacagtcctcctctgcaccagg

A17: rs1937506

CGGGAAAGTAAAAATTGTTATCTCATTCAATTCAAAAAATTTGATAAAATCAGGCTTGGAAAATGTGATTTATTAGGTGTCAAATAATGAAGTTATA  
CCTGTGGAGA[A/G]TATTAGAAGTGAACATTGTAATGGATATGTCCAAAGGATTGGTCCTC

A19: rs7017300

GAGCCAGGACATCAGAAAGAAAATTAAAAACAAAGTGAATACAGTGTGAAGATTGATTTGGGGCAAAGATTTGAAACTAAGACCATGAACAAT  
GAGATTCGTTAATGGAGTTTCCCTTTGTATGATGCCTAGA[A/C]CCAGCAACAGGGCAGTTGCAGTGATTTAAGGATGACTCACAGGGATGG

A3: rs6596075

TTGTGTTCAAGCCTCCTTCCATGGGAAGAACCAGCGGTGGACCTGAAGAGCTCTGCCTTCAAACAGATGATTCACTCA[C/G]AACAGGTTGCTG  
GTGACTGAACCTCAGTGA

A6: rs16901979

AGTGTGGGGTCTTTGTTGTGGAGCAGTGTTAATGATTTAGCATTACTTAT[A/C]TCTGGCAAATGGTATTTTTGAGATAACATGTTATGGAAGAAA  
GTGAACCTGAACCTTGAAGTTTGAAGATCTCGATTGAAGTATC

A23: rs16892766

ACGGTCAGACGCAAACAGTTTCAAGACTATT[A/C]GCTGTAAAGGTTATGCCTTATGTCACCCAAAAGGGTTTTCCCCTAGATTTATAGCACAAA  
CTCATGGAAGATTTATTGCCGTCTTAATTTTTTCCCAAATTTAACTTTAMGAACAGTCAGCCTG

A21: rs7837688

ttcacaggaaaattgagcagaagtacaaagagctcctgtatatacccctacccccacacattcacagcctccctcattaccaacattcccac tagagtggtgcattt[G/T]gtacaattgggtctatgttgacagtc  
att

A22: rs2542151

TGCTCCTGTCTCCCAAACCTCTAGATGCCAAGTGGGCGCTGTAGCCCCACTTCGCCAATGCCTTGGTTCGGGC

GGGC[G/T]CTTCTGAGACTCTCATTTCCTAATTTCACTAACTTCACACCTTCTTGCTAATTCTGATTATTTTTCTCTGCGATAGGGA

A24: rs6997709

TTGACCAAATTGAAGAATTGGTTTGTCTCACCTAAGTTCTATCAAGCCAAATAAGT[G/T]ATGGGACAGGATGAAAAAGATTTTTCTGACGTGA  
AAGGATTTGGGTAGTACCCATTGAATGTTCTCATGGAGATCAAGTCT

A8: rs13281615

GACACGTGGAATTTACTCTTTTGATAAATTGGTAACTATGAATCTCATCAAAGAA[A/G]GCAGAACGCAGATATTCTGAGTAGGGGGTTTGGGG  
GAGAAATAAGAGTGATTCTCTATCTGCTGCTAGGGCCATAAGACACTACACCAAGAGGAAGTGTAGGCTTGGCCAGGT

A10: rs10808556

CTCCATAGAGCCTGCAGAGGGCACTAGACTGGGAATTAGAAAACCTGATTTCCCTCCAGCTCCA[C/T]CTCTGACCAATTGCCTGACCCTGGTC  
AAATTGCTTAACCTCTTCTATCTCAGCTCCCTATCCATAAAACAGAGGGACGAATAAA

A11: rs6983267

TCCTTTGAGCTCAGCAGATGAAAG[G/T]CACTGAGAAAAGTACAAAGAATTTTTATGTGCTATTGACTTTATTTTATTTTATGTGGGGGAGGGAGC  
CGGCCCCAGCTGGAAGCTGCTTCTCTGAATCAAAGGGCAGGAACCCAGCAAGTTTCTCA

A12: rs7014346

GCTTGACGCTTCTGCCTAATGTTGACTTACAGTTCAAGATGGCTTCTGGAGTGCTACC[A/G]TTACATCCATGTTGTAGGCTAGAAGGAAAAGGG  
CAATGGCCTGAAGAGGAAGGGAGAGTTCCTGTTA

A15: rs2820037

GTGATTGCTCTAATTGCCAAGTACAGAAAAAGTTACTGGGTGTGTTTCATAGATCTAGTAGCTCTATTGTGAGGTGAATTTTAGTCAGGACTTCAAT  
TATCACATAGTTTTCTTGAGCCTCCA[A/T]TCTAAAAGAGAGCCTGTGATTACTCTTTTGTCTTTAGGTATTAACATCAACATAGACCTCATGCGC

A20: rs10090154

ttctccagattgatacacagctttaatgcaattctataaaaactctgcaagattttttgtaa[C/T]atAGCTAAAACAATATTGGAAAAAATAGTGAAGTGGTATTCCAAGGCT  
TACTATATGGCCAGAGTAGTCCAGACTGTGGTATTGGCAGAGGCATt

A27: rs660895

CTGTCTGATGGGAGTGAAGATTCTTCTTCAGGAATGGAAGGGGATGCACAGAGTGAAGCCACCCAAACAAAACAAGACTTGTAT[A/G]GCTAT  
AGATGGAAGGGAAATCAACCAGGAAATTTTTGG

A16: rs889312

ATGCCCTGCTGGAGAAAGG[A/C]ATGTGCAAATTAAGAGACTACAAATCAGTTTGAAAACCTCAACGACTCCTTCCCA

A9: rs10505477

CCGTGGGAAACAAAGTCTTCCACTGGGCTTATTCTGTGTCATGTGTCACCCTTGTCTATCAAACAGGAAGCCTTAA[C/T]TGGAGATGAAGATTT  
AGAAAAGGGCAAAGTCAGTATTGA

rs2670660

CACGCACAAGTGATCTACCAGTCTTTTAAA[A/G]TTCTATTATTAACCCAAACATGCTCTTTTCAATTTCCACAGAACACTGGGTCTAAATTTAGAC  
TGGTGATCCTGATGCT

Supplemental Tables: Table S7 (rs numbers refer to the SNP ID)

B1: rs10186922

CAGCTCTGACTCCCAACTCCACACCCCCATGACTTCTTCTCTCCAACCTGTGCTGGGCTGACATCGGTTTCACCTCGCCCATGGTTCCCAAG  
ATGATC[A/G]TGGACATGCAGTCGCATAGCAGAGTCATCTCTCATGCGGGCTGCCTGACACGGATGTCTTCTTGGTCTTTTTGCATGTATAGA  
AGACATGCTCCTGACTG

B2: rs11159647

tgctcactacctgggtgCAATATACTCATATAGCAAAGCTGCACAT[A/G]TATCTAACATAACATTGAAATTTTAAAAATAGGACATTTTaatacaaaattagattaa  
aagtaattactattagcgaataaagtcaaacatttagaaaatctgaaaaatgctgacaa

B3: rs2609653

TGTGCAACAAGAGCATTGTTTTCTAGCATATACTTATTTTAACTatttttagaagca[C/T]ttcgcatttggaaaagtgaataaacctaatgttcatcaatggatgaatggaaaaagaa  
actgtgtactgtatatacaatggaatattatacggctctaaaaaagaatgggatcctgccatctgtcacaacatggatgatcct

B4: rs7570682

AGTGATGGAGTGGCATAGGTAATTTCTGGAATGACTGAAGTAAATATAATCAGCTCACTTTAAAATGAATTTTTTCAGTATAAAGTAACTCTCTGG  
AA[A/G]TTGACATGAAGTTTGATCAGAAATTAAGGCAGAAAGGTATGTGAAACAGTAGAAACTGTAGATATGAGTAAAAAAGTGGGTGGCAAG  
GGATAAGGAAGCATGTAGGG

B5: rs13387042

CAGAAAAGAGGCAATGGA[A/G]GCTACAGAAAACCAAGGATTTCTTGTGGAATCGAATCTTCTTCAATCTTCTTACCACACTAGTGGATCTC  
CCTGTGGGAGGGATGTTGAGAGTGCTCCGTGTTTTT

B6: rs2291533

TTTTTAATTTATCTTCTCATGGTTCTTCTTGGATATCCTCTGGAAGTGTGTAAGACTGAAGAATTTTCATCCCCAGAACTCAC[A/G]TGTT  
GAAGCTCAGCATGTCTTTGGCCAGTAGCTT

B7: rs2822558

TTCTCGACAAAAGTTTTCCACTGGGAAATTATTAACCTGATGTCAGCAACTCATGGACTTGACA[A/G]CAAACCTCAATCTCTCTGGTCTGCC  
CTTTCAAATCCTAATGGCCGTATATCTCTTTGGCAAGAGCTGGGTCCAGCAGTGTAGCAGGG

B8: rs10795668

TTGTTTTCAGGAGTTTTCTATCTATGAGCAGCAGCAGAAAAGAGAAAAAGTTAGATTCTTA[A/G]ATTCCATGATTTTATATTTCCACCAAGGTACAA  
GTATTTCTACTTTTCTACCTGATTGTCTCTACTTTCTCCATGTGTAAtttctttctttctttctttT Cagacggagtctcgt

B9: rs4779584

AGCTGCTATAAGATGGGCTGAGTTAGAAAAACCTAACAGCCCATCCTAATAGACTGAATGTTCTATTGTTTGATGAATGTTATGTGCCAGTAGAA  
CTTGTTGATAAGCCATTCTTC[C/T]GAACAGAAACCAATAACTATAYACACAGGAAACAAAAATTTGTAAATGGCTTTTAGCAGTGGCAA

B10: rs10757274

AGCTTCTCCCCCGTGGGTCAAATCTAAGCTGAGTGTG[A/G]GACATAATTGAAATTCCTAGATAGATAGGAGATAGGGGTAGGGAATTTCTAAT  
CAGAGGGAATAGCACATGTAAGGCAACAATACAGTGCATCTGGGAAAGCTATACAATTTATTGTTATAGGACAAATGTTGGGGAATGTTGAGA  
GATGGAAGTGGAGAGTGAGGCG

B11: rs10757278

GTTAAGTTAGTTGAACTGAACTGAGGCCAGACAGGGCTGTGGGACAAAGTCAAGGTGTGGTCATTCCGGTA[A/G]GCAGCGATGCAGAATCAA  
GACAGAGTAGTTTCTCCTTCTCTCTCTCTTTAATTGTAACG

B12: rs1333049

TCTGCTTCATATTTCAACTTGTGTATGACACTTCTTAGGCTATCATTTTATTCCAAATTTATGGTCACTACCCTACTGTCTTCTCATACTAACCA  
TATGATCAACAGTT[C/G]AAAAGCAGCCACTCGCAGAGGTAAGCAAGATATATGGTAAACTGTGTTGACAAAAGTATGCAGAAGCA

B13: rs2383206

TGGCCCGATGATTTTCAGTTAACCAAATTTCTCCCTTACTATCCTGGTTGCCCTTCTGTCTTTTCTTAGAAATGTTATTGTAGT[A/G]TTTGAAG  
ATGGCCTGAATCCTGAACCCCCATCTTCAATGAGCACCAAATGTAATTATAGATTCCAGCTGTAGAGCTATGTCAG

B14: rs2383207

ATACTTAGCCCTTGGGACCAATTTTTACTCCTGTTGGATCCCTTC[A/G]GCTAAGCATGATTATTTACTATTTTTCAGCTATTAGTTATGTCTTGT  
GAAAAAGTATGAAAAGAGCTGCCAATAAATTAGAGTGTATGCTCAACATTCTTACTTCTT

B15: rs383830

cctgATGTAAACTACTCTTTGTTCAACCCCTAGTAGTACAAATATGATACTTTATTTTACTGTTACTCATGTTGCCTTGAAAACCTCCTGTGTTCTGTT  
ATCTTTGAATGTGAGCTAGT[A/T]ACTTTATTTTAAATTTTTGGAAGTCTGTGGGTGTAATTT

C1: rs7250581

CTCCAAAAGCCAGGAGAATGGGAGGGAAGTGAGGGTTGAAAAATTACCTATCAGGTAGAGTGTTCACTGTTTCGGGAGGTGGGTTTGCTAGAAG  
CTCAATCCCAACCATTAC[A/G]CTATATGCCTATGTAACAAACACACACATATACTTAAAAATTTGTTTTAAAAACCCAAATTTCTGGCTTCTCCTGAA  
AAAAATATAATATGCAGCCACACGGG

C2: rs10733113

CACAGTCTGTTACAAGGGTGGAATGAATTGTTTCTTGTAAGCACTCAGAACAATGAGTGGCACAGAGTGATACATGTTGAGGGCTTTTTGTTGT  
TGTTGTTGTTGAT[A/G]TATTGTCTCAGCACCCCTATTATATTTTTACATGGAGGGGATAAAAAAATCTTTCTTAAGACAGGCCGCAAGAAGTA

C3: rs10761659

ACTGAAAGTGCTCCTTACAAATGAACACTTAAATTCAGGAGCACTTTCAGTTAAAGCAAAGGAGTTAAAGCAAAGACTTTGGGAGTCAGTATCA  
AATAAAGATCATCTCTCAAAC[A/G]TAACAGAAGGAAAACAGGAATTAATTTATTTTACACTTTTTAGAAACGCCCTCCTCTTTGACT

C4: rs10883365

GCCGCATAAGACGTTACTTAAACATGTTACTTAAACAAGACTGCAGTAAACGTTTCTTTCCAAGTGAGAAAGGTCTTTTTCGTTCTCAGACGGTTT  
GAAGGT[A/G]TTTTGTGCCAACGTGACCCCCGGGGAGATTTGGAGGAAGCTTCTACGTCCTAGGAGGCTGAGATCCCACGGAGCCGGTTTACG  
GTTGAGAGCAGACAGTTTCGAGTAGATAGCGCTGGAAGAGACACGAA

C5: rs17234657

AGTGCTGAAGCGGAATTGAGCTCCTTAAGTTTTGTACATCATGTTTTTTAGGTTCCCACTGAGCTGATTTTTGGCCATGATTCACACATATCTCT  
CCTCCAAGGCTCCTCTCAAAAGCATTTCCCTCCAGTCACGTT[G/T]TCAAATAGCTTCTCATTCCCTGTATGCCTGTGTGTGCATGGCCTCATCT  
CACTTTGCTGTGACCATTGCTGCTCAT

C6: rs55646866

AGAGTCTCAGCCTCGTCAGTTATTCCTTCTAGTGCTGGGGACGAAGGGAAGAGGAGGAGAAGGAGCTGGGACCCAGCAGTGATGGGCCTAT  
GGGAGGGAGGATA[C/T]GGCTGCACAGCCCTCAGCGCGTGGCTCAGGCAGGGTCAGCCCTCTGCACATGCCTCCCCCTACCACCACACAC  
GTCATCGCCTTTTTATGTGGTCTGACTTTTTAGATTTTTCAACCTGAAGCTTGCTTTCTC

C7: rs6672995

AGGGTTCCTGGCTCCTACAGAAGACTTGCTTTAGGACTGAAGGCTATATTGCAGTCTGTGTTGGCCTTAGTCGCGGAGGGACATTTAA[A/G]GAT  
GGACTTACTAGAAATGCTCTTCATATCCAGGAACACACAGCACATTTCTCTGATGGGCTGCTGGGACCTTACCATTTACTGGAACCCAACCT  
CTGA

C8: ss107635144

ACTAGAGTGTGTGATTGAGGTAAAGCATGAGACCTGAACTGGCTTCAACACCAGGCT[C/T]GGTCACTCATGCCATGTGTCTTTGAGCAGGTTAC  
TTAACCTATCTGTGCCTCACTTGTGTTTTCTT

C9: rs12037606

TCTTAGTACATACGTTCCAAAT[A/G]TGAATCAGCTGTGATAAAGCTTGTCAAAACACTAACTTAGTCTTAGACTGGGAACAGTACTAAAATAAAG  
GGAATGTTAGATGTTGCATACCATGAACAGCTGAGCTACCT

C10: rs6601764

ATGGTTTTGAGCTTTCAGAGGTGACAGGAGT[C/T]AAGTAAGTGAAGTTATGATGTAAGCACACTTGAATGCTCCTTTAATCTTTAGAGCGGGGG  
CCACTGATCTTTGTTAATTTCCACAAAATCTCTGCAAAGCCGCTTCTTCTGGATTACTCAGAAAAGCCTTCCAGATTGGTGA

C11: rs7807268

CTCTCTCTCTAAATGCCTTGGGACCATCATGTCTAACCTTCGCTACAGACATTGGTGAG[C/G]JACAGCTTAGGCCATGGTGATGTTCACTGT  
AGTGTCCAAACAGGAGGAAATCACCTTCCAGTCCCTT

C12: rs6957669

TGGTGGTGATTACTGCCCTTGTCTGGGGTGCACACAGATGCATCTGGGAGGATCTGGAAGGGGCCTGCCCTCTTGAGCTTGGAGCTCCCTCAT  
ATG[A/G]JTCCACAGTGAGGACACAGTCATTGTTGGTTAGAGACTGGGACTCAAGTTGTAGGCTCCTTTCAGTCTTTGCGTCA

C13: rs12970134

ACTGACTCTTACCAAACAAAGCATGA[A/G]CAAACAAAGATTTATCAGAAGGGTG

C14: rs17782313

CTTGGAAGCAGGAAAACCAGAATATATGTGAGCATCTTTAATGACTACAACATTATAGAAGTTTAAAGCAGGAGAGATTGTATCC[C/T]GATGGAA  
ATGACAAGAAAAGCTTCAGGGGGAAGGTGACATTTAAGTTGGAATATTATTGAGGAGTATCATTTTAGCATCTGGGATTGAGGTAGC

C15: rs1859962

TCACAAAGAACACCTTGGACCAGTTCTTGATATAAATAAGAGGCTGCAGACTTTTCCAAATCCCTGCCCGTG[G/T]GATGAACACTTTAAAGGTCC  
CAAGATTTCTAATAATGGGGCTAAATTTCCAAAATGTG

C16: rs983085

ggaattgtacaccatcaccaaatatggcatataccaggtatgtgaggctgggtcaatattgaaaaccagtcactgtaatacacctt[A/G]ttaacaaactaaggatgaaaaatgtacatgatcataacaatcaatg  
gagaaaaagcatttgacaaaa

D1: rs10490072

**TTTGAAATGCAAGCTCCAAGAGAGTGAAGCCCCAGCCTGCACTGCCTTACTTTGT  
GCAGAGAATGCTTCTTTGGTTATGTATATACATGC[C/T]TGCTTATTCTAATCCATGC  
CTTTATTACGAAATTCATCTAATGTTGTGGCCAAATGGCAATAAAATAATATTATTAC  
AGGACACGGGCCT**

D2: rs1153188

**GAAGATGGTCTGAATGGCAAAATGGATAAAATTTAAATCAAACTAGTGAAGTGA  
ATAGCAAGGTGAGAAGTTCTTCTGAA[A/T]TGCAGTATAAAAGATAAAAAGAAATAC  
AAAGAAAAAGTCATGAAGGACAGATCCAGTGGACGAAACA**

D3: rs13071168

**CCCACATCCAGACTTCTGCTCTGATTCTCACTTCCACTCACCACACGTACCCATCT  
GTTACCCAAAATCACACTGCTGTTCACACCAGAAGTCCCTCCTCTACGATCA[A/G]A  
TTCCTAATCCCAATTTCTACTCACACACCTCGTGGGAGGCCAACACCTTCTTCTGG  
TTCTTCATTCTCTTCTCCTCCCCAGGGCTGACCATCACCAAAGCCAAACAGCT**

D5: rs17705177

**TCAGTTTCCTTCCCCAGAAAATTGTATATCTTGTAGGGTTATTGTGAAGATTAAGT  
GGAATGTGCATGCAAAAGTACTTTGCAAACCAAAAGCTCTAGGTTGG[A/T]GTAAA  
TAACTGAACTTTTAAAAAAAATTTACTTTAAGTTCTGGGATACAACGTGCAGAACGT  
GC**

D6: rs358806

**actttctggagggcagtttgcaatATTTGTCAAATTTTGAATGTGCGTGGGCTTTGACCGAA  
TAACTCTACTCACAAGGATATGTTCTAAAAAGAAAAACACACACGTACATGTGCAGT  
ACAAACAGCAAACTCAATATTCAA[A/C]GTTCAATAAAATTCGTACCACTTTAAAT  
GATGAGC**

D7: rs5015480

**GCTCACCCCTAGGGAAGTGTTCTTAGGGAAGCATTCTAATATTTCCAGCTGTCCAT  
ATATTTTCAAACAAATAATAGGGTATTGAAGTAACTCGAATGTTGATTATA[C/T]GTT  
TTCTATCAAATTATTCAAGTattcattcagaaaatatttattgagcacctacaatgtggc**

D8: rs7020996

**CATTGTGGGGGAAAGTCTGTCTTTAGAAAAGAAATGTAACTGGGCAAGTAGTCTC  
ATCAGTTAAATGATTTCTTGTGACATAAGGTGAGGAAAAGAAGAA[C/T]AACTTTT  
GGGAAAAGTAACTGTGAGAATACAAGGGAAGAAGAAAAATAAGGGGTTGAACATT  
GAGGA**

D9: rs7659604

**GCAAATGTGTTAGGGTAGAGAACATTTTAATGTTATTATCCTAAAAGGAATCTTTAG  
ACTGATAAAAGCTATGGTATTTAACTGTCATGGCTATAATGGCCTTAGCTATAACTT[  
C/T]TGAATCTCAGTGGGAATGGTAGGGGAATAACTGTATTGCACAACCTGGTAACTT  
ACCTTTTCTGATATTTCTCCAAGAGAGGCTGTTCA**

D11: rs2733359

**GAGGGTTGTGACGGTCAACTGTTTTTGTACACATCTTCGATTATTC[C/T]TCCTGTTT  
TCAGCCTCATTCTCTCGTTCTAGGCCATCCTAAAGTACCTGTCATCTCTACGTCTGT  
GGCCTTCTCTGGGCTCCACTAGGCATGTCCCCTTGCATGTATTCCAAGCTGG**

D15: rs4790797

**GGAGCTCTTTGCAAACCTGTGAAATTCTGTGTACTTTGAGGGAGAATAATTGTTAATA  
TTTATTAACATT[A/G]TATTGTATGATTTAACCTTCATAATAATGGTTTTCTATACAG  
AACCATTTTTTATTCTTGTTTTAGAGGCTGAAGTCTT**

D16: rs7223628

tcacaggggaagaagagagagaaagaaatgaaaataaacacagcttgcagcacattggcattaacatgagatcag  
ctgctctctgacca[C/T]ttcctcatagttggttggtgcctattgtcttagaatcacactgaccctagattacagttcccttaa  
ctgctcca

D17: rs8182352

aaccgtgctgtctcagcatattggtctgttctgcacaACCAAAGCTGTAACACTTCTGCTTTCTCT  
GGGTTCAGCCCAGCAGAACCATAATGTGGAAATTTCAACTGGGCTGCCTCTGTC  
[C/T]TTGGGCATATGCCTCCTCCTCCGTCAAACACACTG

D18: rs8182354

**TGCAAATGAGATTTGGCTGTAAACCTCTAAACTCATCTCCTTCTGTTCCCTTACCTTC**  
TACCTTGCTCTTTACTTCTTATCATTCTAAGATAAATTCCC[C/T]TTTAGAGTTTCTGG  
TCTTGAAATTACCCTTCTATTTTTGCTATATTGCCTGTGGTCTCCCTTTTTAAC**CACCT**  
**TGTAAGGCCACATCTC**

D20: rs11761231

**AAGGCATGCAGAGCTTTTGTGTTCAAAGAATTCTGTCTTTTTCTCCCTAAAGCCAT**  
TGCATTTGTTTCAAATCTACGTGTGACTACATTTGGAGATAAGTAGCC[C/T]TTTTCA  
GACCTTCTTGATTTCAAACACAGATTTGGTCTGCACGTTCTCATGATAAGACAGAG  
AAGGAGACCATGGAAATATTTTGCCT**GTCTGTAATTGGCAGGGCTG**

D23: rs6920220

**TGCTACGGCAGCGTAACATAGTAGGTGAAGTACCCATTGATAAATTATATTTTATCT**  
GCTTCCATCTGTTAGCAGGTAACCTTCTCCACTAAAA[A/G]GATATGGTTCTGTAGAA  
CAATGGCATATGCAGACAGTGATCTGTTATTCCACTATTCTCTTAAGCTATCAATCA  
GATT**GATGAGGCAAATTTATGCTTC**



D25: rs6679677

**ATTTTTCAGGTGCCCTGTTG**GAAACTATTCAGTGCTTCCTGCGGCTACCAGCGAAC  
AAGGTCTGAATCCTTGCTCCCAA[A/C]CAATAATCTGTGATCTTAAGCAATTTATTCA  
ACTAACAAgcctgtttctcacctgtattatggagatagtcaccttctaaggatgtgaggattaaatgagaaaccc

D26: rs12141187

**TCAGCATCAGTCACCTCAGCC**AGGTCCCTGAATCACAGCCAAGCCTAGATGAGTG  
GTATTATTGACCATGATAATGGGAGGATGAATGGTGGCTATGACTG[C/T]CTGCTGC  
AATCAACCTTTAGGATGGCCAGAAATTCTGATTTGGCCAGCCCTTGGCCCAGAC**AG**  
**CAATGTCCCAAGA**

D28: rs4132958

**TAGACACAGGCCTGCACAAAG**AGCTTGCAATCTATAGATGGATCAGTTGTCATTAT  
ATAAAGCTCCATATCTTCATTATCAAAGCAGCTATGCTGAATGC[C/T]CTTCTCTGA  
AAGATTGTAAGCAAGCTCTGCAGAACCTGGGCAGGCCAGGGTGAGCCTTGCTCTG  
TGGAGATTATAACAGAAAATAAAAAATAAAGGAAAT**GTAGATGGGCATACCAGCTC**

D32: rs952477

**GCCTTCATGCCCTGACTTC**AGTGGGAGAGAATTAGGCATGGTTGGTAGTGGATTC  
CCTCTCCTTTTCTCCTGTCC[A/G]TGGAGGCTATTGTTCCAAGCCCACCACAAGAGT  
TCTTAAGCCTGGGATCCCAGAAG**GATTCCATTTGCCTTAAGCC**

D33: rs10798269

**TGGACCATTTGAGGTGATGAG**CCTGACCCTCTAAAAAAGGTTAAGCAATTTAATG  
GGTGAGGAAGTTTTTTTGAAGCCTATATCCCAACCAGTTCCCCAGGGCAG[A/G]T  
AGATTTGTAAGGAGAAAAGGAGGAGAGATTGGTGCACCTCAAGAAATCTAGATATT  
CTTCAGGTAACAAACAAGAAAGCAGACACAGGTGAATGCTTT**GGTTTCCCTGGAG**  
**GTCTCTC**

D35: rs729302

**TGAAGCCCTGCTGAGAAAGT**ACTGGGTCCCTATTGGAACCCACTCTCTGCACATC  
TGGAAATCTTTGGAAATAGACCAGAGACCAGGGTGCAGGTGTGCCATGGGACAAG  
GTGAAGAC[**A/C**]CAGGATCACCTACACACC**AGAGTCCACCCAGTAGGA**

D36: rs11171739

**GGAGGGACCAATCAACAGTC**TTATAAGTAGATACAACAGTGTATAAACAAGGAAA  
CCAAGGAAGATTTTTCTC[**C/T**]TTCAGAACTCGGACCCTGAATACCAGGTTGAGCTG  
GAGCTGAGTGAGTAATAAAATGAAAGGCCCTT**AATGTGGGGGAGGGTAGGTAG**

Supplemental Tables: Table S9 (rs numbers refer to the SNP ID)

**E1 rs7716600**

**TGTGAACTTGTATGGCAACCA**AAATGATCAATATATGAAGTGAAGTAGGCATAACACTAAGAAGA  
AACTAAAAAACTTATAATGATAGTTGAGTGTGTTAACCCATCTCTTTTGGAAACAGAGTAGCAGACAAGAAT  
ATTATAGGAAGatgtgcacatgtacc[**A/C**]caaagcttaaagtacaattaaaaaaaaaagaaTATTATA**GGAAGATGGTGA**  
**AAAGGAAGAG**

**E2 rs11249433**

**TTGGAAACATGGATCCAAAA**CTGTGAAAGAAAAAGCAGAGAAAGCAGGGCTGGGTTTAA[**C/T**]T  
TTGGAGTTCCTTGGTTGCTTCTCCTTAGCACAGTGACTCATTGATATCATCTTTAATTTCTCT**GGCTAA**  
**AGGTTTTCCAACAGATAT**

**E3 rs3803662**

**TTGTCATCCAAAGCACCAAC**TATGAGAGATATCTATGTGCAATGGTATATAGATCTGTCATAGAA  
GGGTTTAATTATATCTGCCTAATGATTTTCTCCTTAATGCCTCTATAGCTGTC[**C/T**]CTTAGCGAAGAAT  
AAAAGTGTGGACTGACCCCCACCCATTTGCGAAGAAAGTACTGGGTCTTCAGCTTTCATTGTTTCAGCCGG  
TGG**TCTTTGTGGACAACACCAGG**

**E4 rs393152**

**CCTACTGCCTTGAATCTGC**TGAAGACCAAGCCCCTGCCCCCAAGCCATGGCAAAGAAGGAGG  
GAAGGAAGCAAAGGTGCCAGCGGGGACAACCTCGGGGAGGGGCGAGGTGCCAGGGGCCAGGAAGGC  
CAAGCAGCATGTGGCAGGGCAGCATCAGGTGACTCCCAAGAAGGAATGAGGAGAGGAT[**A/G**]TGAGGAA  
AGAGCCACAGCACAGAGGCCT**GCTGTTAGGTCAGCGGAGAC**

**E5 rs1491923**

**TCTGCACCTTTGGCTTTTAGG**AATc[**C/T**]ACTTTGCTCTGGCATTCTCCTAATTTTCTAGAAAATTA  
TTGGTCTATTTTCATAATTTTATCTTCATTTCCCTAAATCCCAAAATATTGATATTTCCCAAGGGTTTATTTTGA  
CACTTTTCCCTTCTTGCTTGAGATCAATGATTCTTAATTA**ATGTGTGTTGGGAAAGAGGG**

**E6** rs2736098

**CGTGGTTTCTGTGTGGTGT**CACCTGCCAGACCCGCCGAAGAAGCCACCTCTTTGGAGGGTGCGC  
TCTCTGGCACGCGCCACTCCCACCCATCCGTGGGCCGCCAGCACCACGC[**A/G**]GGCCCCCATCCACAT  
CGCGGCCACCACGTCCCTGGGACACGCCTTGCCCCGGTGTACGCCGAGACCAAGCACTTCCT**CTAC**  
**TCCTCAGGCGACAAGG**

**E7** rs801114

**CTCCCCAGTGCATCATTTC**AGTTTTGTCTTTACTTTCAAAGAAAGCTGTCTTTCTGACACTGCAT  
TCTGCCCTTTCTGACCCA[**G/T**]GTCCCATATTTAAAGGCTTCACATAGACTATATAATCCAAGTTATC**CCT**  
**CTGTGGAGAAAGTGGCT**

**E8** rs2151280

**actcgatggccctcaaaag**[**C/T**]gaaacaagctactatcaggacctatagaaaaagtttgccaacctctACACTGTAGTATGCC  
TTAAGGATTTTTAGAAGATTGAGTATGATAAACACTTTCAAAGAA**TGATGAAATTCTGAGAAATG**  
**GG**

**E9** rs4636294

**GGTTGAGCCAGATCTTCAA**GACTTAAAAGGATTTAAGTCC[**A/G**]ATAGTAAAAGGAGCGAAGG  
GAATTCTAGTAAAAGGGAACAGCTTGAGGAATGACCTAGAGACATGACAGTGATCTTTGGAGAAATGGCA  
GTTAGACAGACATTCTGTCTAC**TCGTTTCCCTGTTACATCCC**

**E10** rs823128

**ACTGGCTTTGGGTTGTTAC**AGT[**A/G**]GGATACAAATTCCTGCTTCATCTCTTAATAGTTAGGTGA  
ACTGTGTAGTACTTTTTTATCCTAACCTCAGGCCTAACATATGAAATGAGGATAACATATGCCTTTAAGA  
GTTGTGCATGATTTTGAAATATGTATAAAGTACC**TGGTGAATTATTTGGCATCT**

**E11** rs947211

**AAAGGCCAGGGAAAGAAGAC**AGGAAAAAAGTGAAAACATAAGAGAAAAATTTGCTTCA[**A/G**]AG  
AACTGGTTGTGTGGTTCCCAACTGTCCATATGGCACAGGAAAGTCTCATCTGTGAAACAAAATAAAGTTCC  
CTTCCAACACAGACATGACTGTTCTAATTTCTATGTTATTTCAACTCTCTAGGAGGTGAGAAAAGCAGAAA  
**TTATTGCACCCTAGGCCAT**

E12 rs2736990

**ATGTCTGCCTTTGCATCAGA**TAATGGCTTACAAGTTAATCTCCTCTTGCTCCCTGTTACACACATA  
TACA[C/T]CTTCTTCCTAAACAGCTCATAAGGTGAAAGAAAGACTCAGATTTCTGACTATGTAATTGATAAT  
ATCACACGGACTGCCTGCTCATCATCTGCTAG**TCACATTGGCAGAGTTGACAG**

E13 rs12418451

**GTAAGGGAGTGCTGCTCCTGG**ACCTGCTCCTGAGAATGGCTCCTGGGAGTGATGTAGGTGACT  
GATTGATGGGGTGGGACGAAGCTGGGCAGAGGCTTGGGTAGCTGGGACTGTAACAGTTATGTGAGAGGA  
AGCGGGAATCTGAGAGAGTTGCC[A/G]GGGCAAATGTAGGCCCCAGCCCTGGTTCAGGGGACAGC  
CCAGGGATAGTCACCAGGG**ATCCAGCGATGTGTGTGTGT**

E14 rs10896449

**agcagaatgtggaaggatgg**gcaggagttgtctaagagaagagtgtggcaatagaagggcaccctgggccacaggaacaacatagc  
tgaaagatgaggagtcaagaaatattctggcaccatgggtactattagcagtttaactttacaggagctgaaa[A/G]ttaagaaggggaatgtcaag  
**agatgaggctgaacctgg**

# Supplemental Tables: Table S10 (rs numbers refer to the SNP ID)

## Table 1. Chromatin state maps of 43 IDAGL

| Diseases/Traits/Map Features | LDL TC       | HDL TG       | HDL TC       | LDL TC       | LDL TC       | LDL TC       | TG HDL       | CAD | CAD | T2D  | T2D | T2D | T1D  | T1D  | RA   | RA  | RA  | UC  | CD   | CD | CD   | CD | CD   | CD   | PC CRC | PC CRC | NLP1 | BC  | PD   | PD  | PD | PD   | SCZH | Longevity | Longevity | Longevity | T2D  | CD   | CD   | BC   | BC | MEL  | RA   | HT    | HDL | Disease/Trait/Map Feature | Percent Coverage  |        |          |         |          |        |        |        |        |        |
|------------------------------|--------------|--------------|--------------|--------------|--------------|--------------|--------------|-----|-----|------|-----|-----|------|------|------|-----|-----|-----|------|----|------|----|------|------|--------|--------|------|-----|------|-----|----|------|------|-----------|-----------|-----------|------|------|------|------|----|------|------|-------|-----|---------------------------|-------------------|--------|----------|---------|----------|--------|--------|--------|--------|--------|
|                              |              |              |              |              |              |              |              |     |     |      |     |     |      |      |      |     |     |     |      |    |      |    |      |      |        |        |      |     |      |     |    |      |      |           |           |           |      |      |      |      |    |      |      |       |     |                           |                   | rs127  | rs484    | rs581   | rs439    | rs442  | rs551  | rs104  | rs238  | rs727  |
| SNP                          | 74           | 6914         | 080          | 401          | 0638         | 720          | 2034         | 206 | 8   | 0596 | 1   | 7   | 0986 | 4677 | 9677 | 572 | 777 | 895 | 9220 | 7  | 2995 | 6  | 2660 | 3287 | 6      | 0880   | 312  | 128 | 6990 | 152 | 7  | 6860 | 0638 | 3807      | 2138      | 5         | 1764 | 3662 | 1592 | 6294 | 0  | 6098 | 5436 | score | SNP |                           |                   |        |          |         |          |        |        |        |        |        |
| transRNA                     |              |              |              |              |              |              |              | 1   | 1   | 1    | 1   | 1   | 1    | 1    | 1    | 1   | 1   | 1   | 1    | 1  | 1    | 1  | 1    | 1    | 1      | 1      | 1    | 1   | 1    | 1   | 1  | 1    | 1    | 1         | 1         | 1         | 1    | 1    | 1    | 1    | 1  | 1    | 1    | 1     | 1   | 32                        | transRNA          | 74.419 |          |         |          |        |        |        |        |        |
| Enhancer Function            | 1            |              |              |              |              |              |              |     |     |      |     |     |      |      |      |     |     |     |      |    |      |    |      |      | 1      | 1      |      |     |      |     |    |      |      |           |           |           |      |      |      |      |    |      |      |       |     | 3                         | Enhancer Function | 6.9767 |          |         |          |        |        |        |        |        |
| H3K4Me1                      | 1            | 1            | 1            | 1            | 1            | 1            | 0            | 1   | 1   | 1    | 1   | 1   | 1    | 1    | 1    | 1   | 1   | 1   | 1    | 1  | 1    | 1  | 1    | 1    | 1      | 1      | 1    | 1   | 1    | 1   | 1  | 1    | 1    | 1         | 1         | 1         | 1    | 1    | 1    | 1    | 1  | 1    | 1    | 1     | 1   | 1                         | 1                 | 42     | H3K4Me1  | 97.674  |          |        |        |        |        |        |
| H3K4Me3                      | 1            | 1            | 1            | 1            | 0            | 1            | 1            | 1   | 0   | 1    | 1   | 0   | 0    | 0    | 1    | 1   | 1   | 0   | 0    | 0  | 1    | 1  | 0    | 0    | 0      | 0      | 1    | 0   | 0    | 1   | 0  | 1    | 0    | 1         | 0         | 1         | 0    | 1    | 1    | 1    | 1  | 1    | 0    | 0     | 1   | 1                         | 1                 | 1      | 1        | 26      | H3K4Me3  | 60.465 |        |        |        |        |
| H3K36Me3                     | 1            | 1            | 1            | 1            | 0            | 1            | 1            | 1   | 0   | 0    | 0   | 0   | 0    | 0    | 1    | 0   | 0   | 0   | 0    | 1  | 0    | 0  | 0    | 0    | 0      | 1      | 0    | 0   | 1    | 1   | 1  | 1    | 0    | 1         | 1         | 1         | 1    | 1    | 1    | 1    | 1  | 1    | 0    | 1     | 1   | 1                         | 1                 | 23     | H3K36Me3 | 53.488  |          |        |        |        |        |        |
| H3K27me3                     | 1            | 1            | 0            | 1            | 0            | 1            | 1            | 1   | 1   | 1    | 1   | 1   | 0    | 1    | 0    | 1   | 1   | 1   | 1    | 1  | 1    | 1  | 0    | 0    | 0      | 1      | 0    | 1   | 1    | 1   | 0  | 1    | 0    | 0         | 0         | 1         | 1    | 1    | 1    | 1    | 1  | 1    | 0    | 0     | 1   | 1                         | 1                 | 1      | 1        | 30      | H3K27me3 | 69.767 |        |        |        |        |
| Polycmb                      | 1            | 1            | 1            | 1            | 0            | 1            | 0            | 1   | 0   | 0    | 0   | 0   | 1    | 0    | 0    | 1   | 1   | 1   | 1    | 0  | 1    | 1  | 1    | 1    | 1      | 1      | 1    | 1   | 1    | 1   | 1  | 1    | 0    | 0         | 1         | 1         | 1    | 1    | 1    | 1    | 1  | 1    | 1    | 1     | 1   | 1                         | 1                 | 1      | 31       | Polycmb | 72.093   |        |        |        |        |        |
| NFKB                         |              |              |              | 1            | 1            |              |              |     |     |      |     | 1   | 1    | 1    | 1    | 1   | 1   | 1   | 1    | 1  | 1    | 1  | 1    | 1    | 1      | 1      | 1    | 1   | 1    | 1   | 1  | 1    | 1    | 1         | 1         | 1         | 1    | 1    | 1    | 1    | 1  | 1    | 1    | 1     | 1   | 1                         | 1                 | 1      | 12       | NFKB    | 27.907   |        |        |        |        |        |
| STAT1                        | 1            |              |              | 1            |              |              |              | 1   |     |      |     |     |      |      |      |     |     |     |      | 1  | 1    |    |      |      |        | 1      | 1    |     |      |     |    |      |      |           | 1         |           |      |      |      |      |    |      |      |       |     |                           |                   | 11     | STAT1    | 25.581  |          |        |        |        |        |        |
| HEY1                         | 1            | 1            | 1            | 1            | 1            | 1            |              |     |     |      |     |     |      |      |      |     |     |     |      |    |      |    |      |      |        |        |      | 1   |      |     | 1  |      |      |           |           |           |      |      |      |      |    |      |      |       |     |                           |                   |        | 9        | HEY1    | 20.93    |        |        |        |        |        |
| JUND                         | 1            | 1            | 1            | 1            | 1            | 1            |              |     |     | 1    | 1   |     |      |      |      |     |     |     |      |    |      |    |      |      |        |        |      |     |      |     |    |      |      |           |           |           |      |      |      |      |    |      |      |       |     |                           |                   |        | 9        | JUND    | 20.93    |        |        |        |        |        |
| e-JUN                        | 1            |              |              | 1            | 1            | 1            | 1            |     |     | 1    |     |     |      |      |      |     |     |     |      |    |      |    |      |      |        |        |      |     |      |     |    |      |      |           |           |           |      |      |      |      |    |      |      |       |     |                           |                   |        |          | 8       | e-JUN    | 18.605 |        |        |        |        |
| p300                         | 1            | 1            |              | 1            |              |              |              |     |     |      | 1   |     |      |      |      |     |     |     |      |    |      |    |      |      |        | 1      | 1    |     |      |     |    |      |      |           |           |           |      |      |      |      |    |      |      |       |     |                           |                   |        |          |         | 7        | p300   | 16.279 |        |        |        |
| BAF166                       | 1            |              |              | 1            | 1            |              |              |     |     |      |     |     |      |      |      |     |     |     |      |    |      |    |      |      |        |        |      |     |      |     |    |      |      |           |           |           |      |      |      |      |    |      |      |       |     |                           |                   |        |          | 7       | BAF166   | 16.279 |        |        |        |        |
| FOSL2                        | 1            | 1            | 1            | 1            | 1            | 1            |              |     |     |      |     |     |      |      |      |     |     |     |      |    |      |    |      |      |        |        |      |     |      |     |    |      | 1    |           |           |           |      |      |      |      |    |      |      |       |     |                           |                   |        | 7        | FOSL2   | 16.279   |        |        |        |        |        |
| TAF1                         |              |              |              | 1            |              |              |              |     |     |      |     |     |      |      |      | 1   | 1   |     |      |    |      |    |      |      |        |        |      |     |      |     |    |      |      |           |           |           |      |      |      |      |    |      |      |       |     |                           |                   |        |          | 6       | TAF1     | 13.953 |        |        |        |        |
| CEBP                         | 1            | 1            | 1            |              |              |              |              |     |     |      |     |     |      |      |      |     |     |     |      |    |      |    |      |      |        | 1      | 1    |     |      |     |    |      |      |           |           |           |      |      |      |      |    |      |      |       |     |                           |                   |        |          |         | 5        | CEBP   | 11.628 |        |        |        |
| e-FOS                        |              |              |              |              |              |              |              |     |     |      |     |     |      |      |      |     |     |     |      |    |      |    |      |      |        |        |      |     |      |     |    |      |      |           |           |           |      |      |      |      |    |      |      |       |     |                           |                   |        |          |         | 5        | e-FOS  | 11.628 |        |        |        |
| Rad21                        |              |              |              | 1            |              |              |              |     |     |      |     |     |      |      |      |     |     |     |      |    |      |    |      |      |        |        | 1    | 1   |      |     |    |      |      |           |           |           |      |      |      |      |    |      |      |       |     |                           |                   |        |          |         |          | 5      | Rad21  | 11.628 |        |        |
| CTCF                         |              |              |              | 1            |              |              |              |     |     |      |     |     |      |      |      |     |     |     |      |    |      |    |      |      |        |        |      |     |      |     |    |      |      |           |           |           |      |      |      |      |    |      |      |       |     |                           |                   |        |          |         |          | 5      | CTCF   | 11.628 |        |        |
| PU.1                         | 1            |              |              |              |              |              |              |     |     |      |     |     |      | 1    |      |     |     |     |      |    |      |    |      |      |        |        |      |     |      |     |    |      |      |           |           |           |      |      |      |      |    |      |      |       |     |                           |                   |        |          |         |          | 4      | PU.1   | 9.3023 |        |        |
| BATF                         |              |              |              | 1            |              |              |              |     |     |      |     |     |      |      |      |     |     |     |      |    |      |    |      |      |        |        |      |     |      |     |    |      |      |           |           |           |      |      |      |      |    |      |      |       |     |                           |                   |        |          |         |          |        | 4      | BATF   | 9.3023 |        |
| IRF4                         |              |              |              |              |              |              |              |     |     |      |     |     | 1    |      |      |     |     |     |      |    |      |    |      |      |        |        |      |     |      |     |    |      |      |           |           |           |      |      |      |      |    |      |      |       |     |                           |                   |        |          |         |          |        | 3      | IRF4   | 6.9767 |        |
| EBF                          |              |              |              |              |              |              |              |     |     |      |     |     |      |      |      |     |     |     |      |    |      |    |      |      |        |        |      |     |      |     |    |      |      |           |           |           |      |      |      |      |    |      |      |       |     |                           |                   |        |          |         |          |        |        | 2      | EBF    | 4.6512 |
| HNF4A                        | 1            | 1            |              |              |              |              |              |     |     |      |     |     |      |      |      |     |     |     |      |    |      |    |      |      |        |        | 1    | 1   |      |     |    |      |      |           |           |           |      |      |      |      |    |      |      |       |     |                           |                   |        |          |         |          |        | 4      | HNF4A  | 9.3023 |        |
| RXRA                         |              |              |              | 1            | 1            |              |              |     |     |      |     |     |      |      |      |     |     |     |      |    |      |    |      |      |        |        |      |     |      |     |    |      |      |           |           |           |      |      |      |      |    |      |      |       |     |                           |                   |        |          |         |          |        | 4      | RXRA   | 9.3023 |        |
| e-MYC                        | 1            |              |              | 1            |              |              |              |     |     |      |     |     |      |      |      |     |     |     |      |    |      |    |      |      |        |        |      |     |      |     |    |      |      |           |           |           |      |      |      |      |    |      |      |       |     |                           |                   |        |          |         |          |        |        | 3      | e-MYC  | 6.9767 |
| MAX                          | 1            |              |              | 1            |              |              |              |     |     |      |     |     |      |      |      |     |     |     |      |    |      |    |      |      |        |        |      |     |      |     |    |      |      |           |           |           |      |      |      |      |    |      |      |       |     |                           |                   |        |          |         |          |        |        | 3      | MAX    | 6.9767 |
| BAF170                       |              |              |              | 1            | 1            |              |              |     |     |      |     |     |      |      |      |     |     |     |      |    |      |    |      |      |        |        |      |     |      |     |    |      |      |           |           |           |      |      |      |      |    |      |      |       |     |                           |                   |        |          |         |          |        | 3      | BAF170 | 6.9767 |        |
| Brg1                         |              |              |              | 1            | 1            |              |              |     |     |      |     |     |      |      |      |     |     |     |      |    |      |    |      |      |        |        |      |     |      |     |    |      |      |           |           |           |      |      |      |      |    |      |      |       |     |                           |                   |        |          |         |          |        | 2      | Brg1   | 4.6512 |        |
| Ini1                         | 1            |              |              | 1            |              |              |              |     |     |      |     |     |      |      |      |     |     |     |      |    |      |    |      |      |        |        |      |     |      |     |    |      |      |           |           |           |      |      |      |      |    |      |      |       |     |                           |                   |        |          |         |          |        | 2      | Ini1   | 4.6512 |        |
| OR                           | 1            |              |              |              |              |              |              |     |     |      |     |     |      |      |      |     |     |     |      |    |      |    |      |      |        |        |      |     |      |     |    |      |      |           |           |           |      |      |      |      |    |      |      |       |     |                           |                   |        |          |         |          |        |        | 3      | OR     | 6.9767 |
| Chromatin state score        | 19           | 12           | 9            | 22           | 2            | 14           | 4            | 6   | 6   | 4    | 8   | 5   | 4    | 3    | 5    | 5   | 9   | 15  | 5    | 5  | 4    | 4  | 7    | 10   | 11     | 5      | 4    | 7   | 5    | 6   | 4  | 8    | 3    | 8         | 3         | 5         | 5    | 5    | 5    | 5    | 3  | 2    | 4    | 5     |     |                           |                   |        |          |         |          |        |        |        |        |        |
| Phenotype                    | Blood Lipids | CAD | CAD | T2D  | T2D | T2D | T1D  | T1D  | RA   | RA  | RA  | UC  | CD   | CD | CD   | CD | CD   | CD   | PC     | PC     | NLP  | BC  | PD   | PD  | PD | PD   | SCZH | Longevity | Longevity | Longevity | T2D  | CD   | CD   | BC   | BC | MEL  | RA   | HT    | HDL |                           |                   |        |          |         |          |        |        |        |        |        |

Legend: LDL, low density lipoproteins; TC, total cholesterol; HDL, high density lipoproteins; TG, triglycerids; CAD, coronary artery disease; T2D, type 2 diabetes; T1D, type 1 diabetes; RA, rheumatoid arthritis; UC, ulcerative colitis; CD, Crohn's disease; PC, prostate cancer; CRC, colorectal cancer; SCZH, schizophrenia; BC, breast cancer; PD, Parkinson's disease; MEL, melanoma; HT, hypertension.

</
